# Supplementary material
Source: PubMed Central journal article supplement (PMC2717275)
Supplement: mmc1.pdf [file mmc1.pdf]

Biophysical Journal, Volume 96

**Supporting Material**

**DNA Sequence-directed Organization of Chromatin: Structure-based  
Computational Analysis of Nucleosome-binding Sequences**

Sreekala Balasubramanian, Fei Xu, and Wilma K. Olson

**Supplementary Materials**

**DNA Sequence-directed Organization of Chromatin:  
Structure-based Analysis of Nucleosome-binding Sequences**

**Sreekala Balasubramanian, Fei Xu, and Wilma K. Olson**

Department of Chemistry & Chemical Biology

Rutgers, the State University of New Jersey

Wright-Rieman Laboratories

610 Taylor Road

Piscataway, New Jersey 08854-8087, USA

### List of Supplementary Tables

- Table S1.** Protein-DNA complexes with resolution  $\leq 2.5 \text{ \AA}$  used to generate knowledge-based potentials.
- Table S2.** Nucleosome-positioning sequences: (i) nucleosome-binding sequences from the mouse genome; (ii) anti-selection sequences from the mouse genome; (iii) synthetic SELEX sequences; (iv) high-resolution positioning sequences.
- Table S3.** Properties of DNA base-pair steps used in knowledge-based potentials: (i) number of base-pair steps included in derived ‘energy’ functions; (ii) average values and dispersion of Tilt,  $\langle \theta_1 \rangle \pm (\sigma_{\theta_1})$ , in protein-bound DNA dimers; (iii) average values and dispersion of Roll,  $\langle \theta_2 \rangle \pm (\sigma_{\theta_2})$ , in protein-bound DNA dimers; (iv) average values and dispersion of Twist,  $\langle \theta_3 \rangle \pm (\sigma_{\theta_3})$ , in protein-bound DNA dimers; (v) average values and dispersion of Shift,  $\langle \theta_4 \rangle \pm (\sigma_{\theta_4})$ , in protein-bound DNA dimers; (vi) average values and dispersion of Slide,  $\langle \theta_5 \rangle \pm (\sigma_{\theta_5})$ , in protein-bound DNA dimers; (vii) average values and dispersion of Rise,  $\langle \theta_6 \rangle \pm (\sigma_{\theta_6})$ , in protein-bound DNA dimers; (viii) relative base-pair flexibility  $V$  of protein-bound DNA dimers.
- Table S4.** Comparative ‘cost’ of nucleosomal deformation of individual base-pair steps with knowledge-based functions based on different subsets of observed protein-bound DNA conformations: (i) pyrimidine-purine (YR) base-pair steps; (ii) purine-purine and pyrimidine-pyrimidine (RR, YY) base-pair steps; (iii) purine-pyrimidine (RY) base-pair steps.
- Table S5.** Threading scores of known nucleosome-binding and nucleosome-resistant sequences on the central 60 base-pair steps of the 147-bp nucleosome core-particle structure (NDB\_ID pd0287) (2) and an ideal 61-bp superhelical template with the same average global structure.

**Table S1. Protein-DNA complexes with resolution  $\leq 2.5$  Å used to generate knowledge-based potentials.**

| NDB_ID | PDB_ID | Structure Description                                                    | Resol.<br>(Å) | Literature citation                 |
|--------|--------|--------------------------------------------------------------------------|---------------|-------------------------------------|
| PD0002 | 1A73   | INTRON-ENCODED ENDONUCLEASE I-PPOI/DNA COMPLEX                           | 1.8           | Flick <i>et al.</i> , 1998          |
| PD0003 | 1CRX   | CRE RECOMBINASE/DNA COMPLEX                                              | 2.4           | Guo <i>et al.</i> , 1997            |
| PD0006 | 3PVI   | RESTRICTION ENDONUCLEASE PVUII/DNA COMPLEX                               | 1.59          | Horton <i>et al.</i> , 1998b        |
| PD0007 | 9ANT   | ANTENNAPEDIA HOMEODOMAIN/DNA COMPLEX                                     | 2.4           | Fraenkel & Pabo, 1998               |
| PD0008 | 1A6Y   | REVERBA ORPHAN NUCLEAR RECEPTOR/DNA COMPLEX                              | 2.3           | Zhao <i>et al.</i> , 1998           |
| PD0010 | 1BGB   | ECORV ENDONUCLEASE/DNA COMPLEX                                           | 2.0           | Horton & Perona, 1998a              |
| PD0011 | 2PVI   | RESTRICTION ENDONUCLEASE/DNA COMPLEX                                     | 1.76          | Horton <i>et al.</i> , 1998a        |
| PD0012 | 1BNZ   | SSO7D HYPERTHERMOPHILE PROTEIN/DNA COMPLEX                               | 2.0           | Gao <i>et al.</i> , 1998            |
| PD0013 | 1RV5   | ECORV ENDONUCLEASE/DNA COMPLEX                                           | 2.1           | Horton & Perona, 1998b              |
| PD0016 | 3HDD   | ENGRAILED HOMEODOMAIN/DNA COMPLEX                                        | 2.2           | Fraenkel <i>et al.</i> , 1998       |
| PD0020 | 1BC8   | SAP-1 ETS DOMAIN/DNA COMPLEX                                             | 1.9           | Mo <i>et al.</i> , 1998             |
| PD0024 | 1B3T   | EBNA-1 NUCLEAR PROTEIN/DNA COMPLEX                                       | 2.2           | Bochkarev <i>et al.</i> , 1998      |
| PD0027 | 1BC7   | SERUM RESPONSE FACTOR ACCESSORY PROTEIN 1A (SAP-1)/DNA COMPLEX           | 2.0           | Mo <i>et al.</i> , 1998             |
| PD0028 | 1BG1   | TRANSCRIPTION FACTOR STAT3B/DNA COMPLEX                                  | 2.2           | Becker <i>et al.</i> , 1998         |
| PD0029 | 2BAM   | PROTEIN (ENDONUCLEASE BAMHI)/DNA COMPLEX                                 | 2.0           | Viadiu & Aggarwal, 1998             |
| PD0030 | 2KTQ   | LARGE FRAGMENT OF DNA POLYMERASE I/DNA COMPLEX                           | 2.3           | Li <i>et al.</i> , 1998b            |
| PD0031 | 3BAM   | PROTEIN (RESTRICTION ENDONUCLEASE BAMHI) (3.1.21.4)/DNA COMPLEX          | 1.8           | Viadiu, & Aggarwal, 1998            |
| PD0032 | 3KTQ   | LARGE FRAGMENT OF DNA POLYMERASE I/DNA COMPLEX                           | 2.3           | Li <i>et al.</i> , 1998b            |
| PD0033 | 4KTQ   | LARGE FRAGMENT OF DNA POLYMERASE I/DNA COMPLEX                           | 2.5           | Li <i>et al.</i> , 1998b            |
| PD0035 | 1BDT   | WILD TYPE GENE-REGULATING PROTEIN ARC/DNA COMPLEX                        | 2.5           | Schildbach <i>et al.</i> , 1999     |
| PD0037 | 1B94   | RESTRICTION ENDONUCLEASE ECORV/DNA COMPLEX                               | 1.9           | Thomas <i>et al.</i> , 1999         |
| PD0042 | 1B8I   | IV/HOMEBOX PROTEIN EXTRADENTICLE/DNA COMPLEX PRE-TRANSITION STATE ECO RI | 2.4           | Passner <i>et al.</i> , 1999        |
| PD0049 | 1CKQ   | ENDONUCLEASE/DNA COMPLEX                                                 | 1.85          | Horvath <i>et al.</i> , unpublished |
| PD0050 | 6PAX   | HOMEBOX PROTEIN PAX-6/DNA COMPLEX                                        | 2.5           | Xu <i>et al.</i> , 1999             |
| PD0051 | 1CKT   | HIGH MOBILITY GROUP PROTEIN HMG1/DNA COMPLEX                             | 2.5           | Ohndorf <i>et al.</i> , 1999        |

| NDB_ID | PDB_ID | Structure Description                                           | Resol.<br>(Å) | Literature citation                 |
|--------|--------|-----------------------------------------------------------------|---------------|-------------------------------------|
| PD0052 | 1SSP   | URACIL-DNA GLYCOSYLASE/DNA COMPLEX                              | 1.9           | Parikh <i>et al.</i> , 1998         |
| PD0054 | 1CL8   | ENDONUCLEASE/DNA COMPLEX                                        | 1.8           | Horvath <i>et al.</i> , unpublished |
| PD0055 | 1QPS   | ENDONUCLEASE ECORI/DNA COMPLEX                                  | 2.5           | Horvath <i>et al.</i> , unpublished |
| PD0056 | 1QPZ   | PURINE NUCLEOTIDE SYNTHESIS REPRESSOR/DNA COMPLEX               | 2.5           | Glasfeld <i>et al.</i> , 1999       |
| PD0062 | 1QRH   | RESTRICTION ENDONUCLEASE ECO-RI/DNA COMPLEX                     | 2.5           | Choi <i>et al.</i> , 2002           |
| PD0065 | 1QSY   | KLENOW FRAGMENT OF DNA POLYMERASE I/DNA COMPLEX                 | 2.3           | Li <i>et al.</i> , 1999             |
| PD0066 | 1QSS   | KLENOW FRAGMENT OF DNA POLYMERASE I/DNA COMPLEX                 | 2.3           | Li <i>et al.</i> , 1999             |
| PD0067 | 1QTM   | DNA POLYMERASE I (E.C.2.7.7.7)/DNA COMPLEX                      | 2.3           | Li <i>et al.</i> , 1999             |
| PD0068 | 1QUM   | ENDONUCLEASE IV (E.C.3.1.21.2)/DNA COMPLEX                      | 1.6           | Hosfield <i>et al.</i> , 1999       |
| PD0070 | 1D3U   | TATA-BINDING PROTEIN/DNA COMPLEX                                | 2.4           | Littlefield <i>et al.</i> , 1999    |
| PD0071 | 1BY4   | PROTEIN RETINOIC ACID RECEPTOR/DNA COMPLEX                      | 2.1           | Zhao <i>et al.</i> , 2000           |
| PD0073 | 3HTS   | HEAT SHOCK TRANSCRIPTION FACTOR/DNA COMPLEX                     | 1.8           | Littlefield & Nelson, 1999          |
| PD0075 | 1B72   | PBX1, HOMEBOX PROTEIN HOX-B1/DNA TERNARY COMPLEX                | 2.4           | Piper <i>et al.</i> , 1999          |
| PD0076 | 2IRF   | INTERFERON REGULATORY FACTOR 2/DNA COMPLEX                      | 2.2           | Fujii <i>et al.</i> , 1999          |
| PD0088 | 1BF4   | PROTEIN (CHROMOSOMAL PROTEIN SSO7D)/DNA COMPLEX                 | 1.6           | Gao <i>et al.</i> , 1998            |
| PD0089 | 1HWT   | PROTEIN (HEME ACTIVATOR PROTEIN)/DNA COMPLEX                    | 2.5           | King <i>et al.</i> , 1999a          |
| PD0090 | 2HAP   | HEME ACTIVATOR PROTEIN HAP1-18/DNA COMPLEX                      | 2.5           | King <i>et al.</i> , 1999b          |
| PD0096 | 1CYQ   | INTRON-ENCODED HOMING ENDONUCLEASE I-PPOI/DNA COMPLEX           | 1.9           | Galburt <i>et al.</i> , 1999        |
| PD0099 | 1DIZ   | 3-METHYLADENINE DNA GLYCOSYLASE II/DNA COMPLEX                  | 2.5           | Hollis <i>et al.</i> , 2000         |
| PD0101 | 1DFM   | ENDONUCLEASE BGLII/DNA COMPLEX                                  | 1.5           | Lukacs <i>et al.</i> , 2000         |
| PD0108 | 1DMU   | BGLI RESTRICTION ENDONUCLEASE/DNA COMPLEX                       | 2.2           | Newman <i>et al.</i> , 1998         |
| PD0110 | 1QRV   | HIGH MOBILITY GROUP PROTEIN D/DNA COMPLEX                       | 2.2           | Murphy IV <i>et al.</i> , 1999      |
| PD0111 | 1DP7   | MHC CLASS II TRANSCRIPTION FACTOR HRFX1/DNA COMPLEX             | 1.5           | Gajiwala <i>et al.</i> , 2000       |
| PD0115 | 1DSZ   | RETINOIC ACID RECEPTOR RXR $\alpha$ & RAR $\alpha$ /DNA COMPLEX | 1.7           | Rastinejad <i>et al.</i> , 2000     |
| PD0116 | 1DUX   | ETS-DOMAIN PROTEIN ELK-1/DNA COMPLEX                            | 2.1           | Mo <i>et al.</i> , 2000             |
| PD0117 | 1EBM   | 8-OXOGUANINE DNA GLYCOSYLASE/DNA COMPLEX                        | 2.1           | Bruner <i>et al.</i> , 2000         |
| PD0119 | 1CA5   | CHROMOSOMAL PROTEIN SAC7D/DNA COMPLEX                           | 2.2           | Su <i>et al.</i> , 2000             |
| PD0120 | 1CA6   | CHROMOSOMAL PROTEIN SAC7D/DNA COMPLEX                           | 2.2           | Su <i>et al.</i> , 2000             |
| PD0121 | 1EGW   | MADS BOX TRANSCRIPTION ENHANCER FACTOR 2/DNA COMPLEX            | 1.5           | Santelli & Richmond, 2000           |
| PD0122 | 1QPI   | TETRACYCLINE REPRESSOR/DNA COMPLEX                              | 2.5           | Orth <i>et al.</i> , 2000           |

| NDB_ID  | PDB_ID | Structure Description                                              | Resol.<br>(Å) | Literature citation                    |
|---------|--------|--------------------------------------------------------------------|---------------|----------------------------------------|
| PD0126  | 1QAI   | REVERSE TRANSCRIPTASE/DNA COMPLEX                                  | 2.3           | Najmudin <i>et al.</i> , 2000          |
| PD0127  | 1EMH   | URACIL-DNA GLYCOSYLASE/DNA COMPLEX                                 | 1.8           | Parikh <i>et al.</i> , 2000            |
| PD0131  | 1EON   | TYPE II RESTRICTION ENZYME ECORV/DNA COMPLEX                       | 1.6           | Horton <i>et al.</i> , 2000            |
| PD0132  | 1EEO   | TYPE II RESTRICTION ENZYME ECORV/DNA COMPLEX                       | 2.2           | Horton & Perona, 2000                  |
| PD0139  | 1ESG   | TYPE II RESTRICTION ENZYME BAMH/DNA COMPLEX                        | 1.9           | Viadiu & Aggarwal, 2000                |
| PD0141  | 1EWN   | 3-METHYL-ADENINE DNA GLYCOSYLASE/DNA COMPLEX                       | 2.1           | Lau <i>et al.</i> , 2000               |
| PD0142  | 1EWQ   | DNA MISMATCH REPAIR PROTEIN MUTS/DNA COMPLEX                       | 2.2           | Obmolova <i>et al.</i> , 2000          |
| PD0147  | 1EYU   | TYPE II RESTRICTION ENZYME PVUII/DNA COMPLEX                       | 1.8           | Horton & Cheng, 2000                   |
| PD0151  | 1D02   | RESTRICTION ENDONUCLEASE/DNA COMPLEX                               | 1.7           | Deibert <i>et al.</i> , 1999           |
| PD0152  | 1D1U   | MOLONEY MURINE LEUKEMIA VIRUS REVERSE<br>TRANSCRIPTASE/DNA COMPLEX | 2.3           | Cote <i>et al.</i> , 2000              |
| PD0153  | 1D2I   | RESTRICTION ENDONUCLEASE BGLI/DNA COMPLEX                          | 1.7           | Lukacs <i>et al.</i> , 2000            |
| PD0154  | 1QN4   | TRANSCRIPTION INITIATION FACTOR TFIID-1/DNA COMPLEX                | 1.9           | Patikoglou <i>et al.</i> , 1999        |
| PD0160  | 1QNA   | TRANSCRIPTION INITIATION FACTOR TFIID-1/DNA COMPLEX                | 1.8           | Patikoglou <i>et al.</i> , 1999        |
| PD0173  | 1MJ2   | METHIONINE REPRESSOR MUTANT (Q44K)/DNA COMPLEX                     | 2.4           | Garvie & Phillips, 2000                |
| PD0180  | 1GD2   | TRANSCRIPTION FACTOR PAPI/DNA COMPLEX                              | 2.0           | Fujii <i>et al.</i> , 2000             |
| PD0194  | 1FJX   | HHAI METHYLTRANSFERASE MUTANT                                      | 2.3           | Vilkaitis <i>et al.</i> , 2000         |
| PDE001  | 1ERI   | ECO RI ENDONUCLEASE (E.C.3.1.21.4)/DNA COMPLEX                     | 2.5           | Kim <i>et al.</i> , 1990               |
| PDE005  | 1DNK   | (E.C.3.1.21.1)/DNA COMPLEX                                         | 2.3           | Weston <i>et al.</i> , 1992            |
| PDE006  | 2DNJ   | (E.C.3.1.21.1)/DNA COMPLEX                                         | 2.0           | Lahm & Suck, 1991                      |
| PDE009  | 1HCR   | HIN RECOMBINASE/DNA COMPLEX                                        | 2.3           | Feng <i>et al.</i> , 1994              |
| PDE0125 | 1BPY   | DNA POLYMERASE $\beta$ /DNA COMPLEX                                | 2.2           | Sawaya <i>et al.</i> , 1997            |
| PDE0126 | 1BPX   | DNA POLYMERASE $\beta$ /DNA COMPLEX                                | 2.4           | Sawaya <i>et al.</i> , 1997            |
| PDE0128 | 1TC3   | TC3 TRANSPOSASE/DNA COMPLEX                                        | 2.5           | Van Pouderoyen <i>et al.</i> ,<br>1997 |
| PDE0131 | 2BDP   | DNA POLYMERASE I/DNA COMPLEX                                       | 1.8           | Kiefer <i>et al.</i> , 1998            |
| PDE0132 | 3BDP   | DNA POLYMERASE I/DNA COMPLEX                                       | 1.9           | Kiefer <i>et al.</i> , 1998            |
| PDE0133 | 4BDP   | DNA POLYMERASE I/DNA COMPLEX                                       | 1.8           | Kiefer <i>et al.</i> , 1998            |
| PDE0135 | 1T7P   | DNA POLYMERASE, THIOREDOXIN/DNA COMPLEX                            | 2.2           | Doublie <i>et al.</i> , 1998           |
| PDE014  | 1RVA   | ECO RV/DNA COMPLEX                                                 | 2.0           | Kostrewa & Winkler, 1995               |
| PDE0143 | 1A35   | HUMAN TOPOISOMERASE I/DNA COMPLEX                                  | 2.5           | Redinbo <i>et al.</i> , 1998           |

| NDB_ID  | PDB_ID | Structure Description                                               | Resol.<br>(Å) | Literature citation             |
|---------|--------|---------------------------------------------------------------------|---------------|---------------------------------|
| PDE0145 | 1BSU   | ENDONUCLEASE ECORV (E.C.3.1.21.4)/DNA COMPLEX                       | 2.0           | Martin <i>et al.</i> , 1999     |
| PDE020  | 1BHM   | BAMHI (E.C.3.1.21.4)/DNA COMPLEX                                    | 2.2           | Newman <i>et al.</i> , 1995     |
| PDE025  | 1FJL   | SEGMENTATION PROTEIN PAIRED/DNA COMPLEX                             | 2.0           | Wilson <i>et al.</i> , 1995     |
| PDE139  | 1AZ0   | ECORV ENDONUCLEASE (E.C.3.1.21.4)/DNA COMPLEX                       | 2.0           | Perona & Martin, 1997           |
| PDE141  | 6MHT   | CYTOSINE-SPECIFIC METHYLTRANSFERASE HHAI (E.C.2.1.1.73)/DNA COMPLEX | 2.05          | Kumar <i>et al.</i> , 1997      |
| PDR001  | 3CRO   | 434 CRO/DNA COMPLEX                                                 | 2.5           | Mondragon & Harrison, 1991      |
| PDR004  | 2OR1   | 434 REPRESSOR/DNA COMPLEX                                           | 2.5           | Aggarwal <i>et al.</i> , 1988   |
| PDR010  | 1LMB   | LAMBDA REPRESSOR/DNA COMPLEX                                        | 1.8           | Beamer & Pabo, 1992             |
| PDR011  | 1RPE   | 434 REPRESSOR/DNA COMPLEX                                           | 2.5           | Shimon & Harrison, 1993         |
| PDR013  | 1TRR   | TRP REPRESSOR/DNA COMPLEX                                           | 2.4           | Lawson & Carey, 1993            |
| PDR015  | 1PER   | 434 REPRESSOR/DNA COMPLEX                                           | 2.5           | Rodgers & Harrison, 1993        |
| PDR018  | 1PDN   | PRD PAIRED/DNA COMPLEX                                              | 2.5           | Xu <i>et al.</i> , 1995         |
| PDR021  | 2NLL   | RETINOIC ACID RECEPTOR, THYROID HORMONE RECEPTOR/DNA COMPLEX        | 1.9           | Rastinejad <i>et al.</i> , 1995 |
| PDR022  | 1TSR   | P53 TUMOR SUPPRESSOR/DNA COMPLEX                                    | 2.2           | Cho <i>et al.</i> , 1994        |
| PDR023  | 1BER   | CAP/DNA COMPLEX                                                     | 2.5           | Parkinson <i>et al.</i> , 1996  |
| PDR031  | 1AIS   | TATA-BINDING PROTEIN/DNA COMPLEX                                    | 2.1           | Kosa <i>et al.</i> , 1997       |
| PDR032  | 1A3Q   | HUMAN NF- $\kappa$ B P52 BOUND TO DNA                               | 2.1           | Cramer <i>et al.</i> , 1997     |
| PDR034  | 1AU7   | PIT-1 MUTANT/DNA COMPLEX                                            | 2.3           | Jacobson <i>et al.</i> , 1997   |
| PDR036  | 1MNM   | $\alpha$ -2 TRANSCRIPTIONAL REPRESSOR/DNA COMPLEX                   | 2.2           | Tan & Richmond, 1998            |
| PDR047  | 1AZP   | HYPERTHERMOPHILE CHROMOSOMAL PROTEIN SAC7D/DNA COMPLEX              | 1.6           | Robinson <i>et al.</i> , 1998   |
| PDR048  | 1AZQ   | HYPERTHERMOPHILE CHROMOSOMAL PROTEIN SAC7D/DNA COMPLEX              | 1.9           | Robinson <i>et al.</i> , 1998   |
| PDR049  | 1AKH   | MAT A1/ $\alpha$ 2/DNA TERNARY COMPLEX                              | 2.5           | Li <i>et al.</i> , 1998a        |
| PDR051  | 2RAM   | TRANSCRIPTION FACTOR NF- $\kappa$ B P65/DNA COMPLEX                 | 2.4           | Chen <i>et al.</i> , 1998       |
| PDR056  | 1BL0   | MULTIPLE ANTIBIOTIC RESISTANCE PROTEIN/DNA COMPLEX                  | 2.3           | Rhee <i>et al.</i> , 1998       |
| PDR056  | 1HCQ   | ESTROGEN RECEPTOR/DNA COMPLEX                                       | 2.4           | Schwabe <i>et al.</i> , 1993    |
| PDT012  | 1YTB   | TATA BINDING PROTEIN (TBP)/DNA COMPLEX                              | 1.8           | Kim <i>et al.</i> , 1993        |
| PDT013  | -      | HNF-3/FORK HEAD DNA-RECOGNITION MOTIF/DNA COMPLEX                   | 2.5           | Clark <i>et al.</i> , 1993      |

| NDB_ID | PDB_ID | Structure Description                                                  | Resol.<br>(Å) | Literature citation                    |
|--------|--------|------------------------------------------------------------------------|---------------|----------------------------------------|
| PDT015 | 1NFK   | NUCLEAR FACTOR $\kappa$ B (NF- $\kappa$ B)/DNA COMPLEX                 | 2.3           | Ghosh <i>et al.</i> , 1995             |
| PDT028 | 1YRN   | MAT A1 HOMEODOMAIN, MAT $\alpha$ 2 HOMEODOMAIN/DNA COMPLEX             | 2.5           | Li <i>et al.</i> , 1995                |
| PDT029 | 2DGC   | GCN4/DNA COMPLEX                                                       | 2.2           | Keller <i>et al.</i> , 1995            |
| PDT030 | 1LAT   | GLUCOCORTICOID RECEPTOR MUTANT/DNA COMPLEX                             | 1.9           | Gewirth & Sigler, 1995                 |
| PDT031 | –      | EVEN-SKIPPED HOMEODOMAIN/DNA COMPLEX                                   | 2.0           | Hirsch & Aggarwal, 1995                |
| PDT033 | 1PUE   | TRANSCRIPTION FACTOR PU.1/DNA COMPLEX                                  | 2.1           | Kodandapani <i>et al.</i> , 1996       |
| PDT034 | 1CDW   | TATA BINDING PROTEIN (TBP)/DNA COMPLEX                                 | 1.9           | Nikolov <i>et al.</i> , 1996           |
| PDT035 | 1IGN   | RAP1/DNA COMPLEX                                                       | 2.2           | Koenig <i>et al.</i> , 1996            |
| PDT036 | 1YTF   | TRANSCRIPTION FACTOR IIA (TFIIA)/DNA COMPLEX                           | 2.5           | Tan <i>et al.</i> , 1996               |
| PDT038 | 1UBD   | YY1 ZINC FINGER DOMAIN MUTANT/DNA COMPLEX                              | 2.5           | Houbaviy <i>et al.</i> , 1996          |
| PDT039 | 1AAAY  | ZIF268 ZINC FINGER PEPTIDE/DNA COMPLEX                                 | 1.6           | Elrod-Erickson <i>et al.</i> , 1996    |
| PDT040 | 1IHF   | INTEGRATION HOST FACTOR/DNA COMPLEX                                    | 2.2           | Rice <i>et al.</i> , 1996              |
| PDT043 | 2HDD   | ENGRAILED HOMEODOMAIN Q50K VARIANT/DNA COMPLEX                         | 1.9           | Tucker-Kellogg <i>et al.</i> ,<br>1997 |
| PDT044 | 1ZME   | PROLINE UTILIZATION TRANSCRIPTION ACTIVATOR (PUT3)/DNA<br>COMPLEX      | 2.5           | Swaminathan <i>et al.</i> , 1997       |
| PDT045 | 1XBR   | T DOMAIN/DNA COMPLEX                                                   | 2.5           | Muller & Herrmann, 1997                |
| PDT048 | 1AWC   | GA BINDING PROTEIN $\alpha$ , GA BINDING PROTEIN $\beta$ 1/DNA COMPLEX | 2.1           | Batchelor <i>et al.</i> , 1998         |
| PDT049 | 2CGP   | CATABOLITE GENE ACTIVATOR PROTEIN/DNA COMPLEX                          | 2.2           | Passner & Steitz, 1997                 |
| PDT055 | 1A1F   | THREE-FINGER ZIF268 PEPTIDE/DNA COMPLEX                                | 2.1           | Elrod-Erickson <i>et al.</i> , 1998    |
| PDT056 | 1A1G   | THREE-FINGER ZIF268 PEPTIDE/DNA COMPLEX                                | 1.9           | Elrod-Erickson <i>et al.</i> , 1998    |
| PDT057 | 1A1H   | QGSR (THREE-FINGER ZIF268 VARIANT)/DNA COMPLEX                         | 1.6           | Elrod-Erickson <i>et al.</i> , 1998    |
| PDT059 | 1A1I   | ZINC FINGER/DNA COMPLEX                                                | 1.6           | Elrod-Erickson <i>et al.</i> , 1998    |
| PDT062 | 1AM9   | STEROL REGULATORY ELEMENT BINDING(STRE)/DNA COMPLEX                    | 2.3           | Parraga <i>et al.</i> , 1998           |
| PDTB41 | 1MEY   | CONSENSUS ZINC FINGER/DNA COMPLEX                                      | 2.2           | Kim & Berg, 1996                       |
| PDV001 | 2BOP   | E2/DNA COMPLEX                                                         | 1.7           | Hegde <i>et al.</i> , 1992             |

Note: Multiple entries of *Eco* RV endonuclease reflect different structures solved to study the different functional aspects of the catalytic activity of the enzyme.



### References to Table S1

- Aggarwal, A.K., Rodgers, D.W., Drottar, M., Ptashne, M. & Harrison, S.C. (1988) Recognition of a DNA operator by the repressor of Phage 434: A view at high resolution. *Science* **242**, 899-907.
- Batchelor, A.H., Piper, D.E., Charles De La Brousse, D., McKnight, S.L. & Wolberger, C. (1998) The structure of GABP  $\alpha/\beta$ : an ETS domain-ankyrin repeat heterodimer bound to DNA. *Science* **279**, 1037-1041.
- Beamer, L.J. & Pabo, C.O. (1992) Refined 1.8 Å crystal structure of the  $\lambda$  repressor-operator complex. *J. Mol. Biol.*, **227**, 177-196.
- Becker, S., Groner, B. & Muller, C.W. (1998) Three-dimensional structure of the Stat3 $\beta$  homodimer bound to DNA. *Nature* **394**, 145-151.
- Bochkarev, A., Bochkareva, E., Edwards, A.M. & Frappier, L. (1998) The 2.2 Å structure of a permanganate-sensitive DNA site bound by the Epstein-Barr virus origin binding protein, EBNA1. *J. Mol. Biol.* **284**, 1273-1278.
- Bruner, S.D., Norman, D.P. & Verdine, G.L. (2000) Structural basis for recognition and repair of the endogenous mutagen 8-oxoguanine in DNA. *Nature* **403**, 859-866.
- Chen, Y.Q., Ghosh, S. & Ghosh, S. (1998) A novel DNA recognition mode by the NF- $\kappa$  B P65 homodimer. *Nature Struct. Biol.* **5**, 67-73.
- Cho, Y., Gorina, S., Jeffrey, P.D. & Pavletich, N.P. (1994) Crystal structure of a P53 tumor suppressor-DNA complex: Understanding tumorigenic mutations. *Science* **265**, 346-355.
- Choi, J., Kim, Y., Greene, P., Hager, P. & Rosenberg, J.M. (to be published) X-ray structure of the DNA-*Eco* RI endonuclease complexes with the ED144 & RK145 mutations.
- Clark, K.L., Halay, E.D., Lai, E. & Burley, S.K. (1993) Co-crystal structure of the HNF-3/Fork Head DNA-recognition motif resembles histone H5. *Nature* **364**, 412-420.
- Cote, M.L., Yohannan, S.J. & Georgiadis, M.M. (2000) Use of an N-terminal fragment from Moloney murine leukemia virus reverse transcriptase to facilitate crystallization and analysis of a pseudo-16-mer DNA molecule containing G-A mispairs. *Acta Crystallogr., Sect. D* **56**, 1120-1131.
- Cramer, P., Larson, C.J., Verdine, G.L. & Muller, C.W. (1997) Structure of the human NF- $\kappa$ B p52 homodimer-DNA complex at 2.1 Å resolution. *EMBO J.* **16**, 7078-7090.
- Deibert, M., Grazulis, S., Janulaitis, A., Siksny, V. & Huber, V. (1999) Crystal structure of Mun I restriction endonuclease in complex with cognate DNA at 1.7 Å Resolution. *EMBO J.* **18**, 5805-5816.
- Double, S., Tabor, S., Long, A.M., Richardson, C.C. & Ellenberger, T. (1998) Crystal structure of a bacteriophage T7 DNA replication complex at 2.2 Å resolution. *Nature* **391**, 251-258.
- Elrod-Erickson, M., Benson, T.E. & Pabo, C.O. (1998) High-resolution structures of variant Zif268-DNA complexes: implications for understanding zinc finger-DNA recognition. *Structure* **6**, 451-464.
- Elrod-Erickson, M., Rould, M.A., Nekludova, L. & Pabo, C.O. (1996) Zif268 protein-DNA complex refined at 1.6 Å: a model system for understanding zinc finger-DNA interactions. *Structure* **4**, 1171-1180.
- Feng, J.A., Johnson, R.C. & Dickerson, R.E. (1994) Hin recombinase bound to DNA: The origin of specificity in major and minor groove interactions. *Science* **263**, 348-355.
- Flick, K.E., Jurica, M.S., Monnat Jr., R.J. & Stoddard, B.L. (1998) DNA binding and cleavage by the nuclear intron-encoded homing endonuclease I-PpoI. *Nature* **394**, 96-101.
- Fraenkel, E. & Pabo, C.O. (1998) Comparison of X-ray and NMR structures for the *Antennapedia* homeodomain-DNA complex. *Nature Struct. Biol.* **5**, 692-697.

- Fraenkel, E., Rould, M.A., Chambers, K.A. & Pabo, C.O. (1998) Engrailed homeodomain-DNA complex at 2.2 Å resolution: a detailed view of the interface and comparison with other engrailed structures. *J. Mol. Biol.* **284**, 351-361.
- Fujii, Y., Shimizu, T., Kusumoto, M., Kyogoku, Y., Taniguchi, T. & Hakoshima, T. (1999) Crystal structure of an IRF/DNA complex reveals novel DNA recognition and cooperative binding to a tandem repeat of core sequence. *EMBO J.* **18**, 5028-5041.
- Fujii, Y., Shimizu, T., Toda, T., Yanagida, M. & Hakoshima, T. (2000) Structural basis for the DNA recognition diversity of bZIP transcription factors revealed by the crystal structure of Pap1/DNA complex. *Nature Struct. Biol.* **7**, 889-893.
- Gajiwala, K.S., Chen, H., Cornille, F., Roques, B.P., Reith, W., Mach, B. & Burley, S.K. (2000) Structure of the winged helix-protein hRFX1 reveals a new mode of DNA binding. *Nature* **403**, 916-921.
- Galburt, E.A., Chevalier, B., Tang, W., Jurica, M.S., Flick, K.E., Monnat Jr., R.J. & Stoddard, B.L. (1999) A novel endonuclease mechanism directly visualized for I-PpoI. *Nature Struct. Biol.* **6**, 1096-1099.
- Gao, Y.G., Su, S.Y., Robinson, H., Padmanabhan, S., Lim, L., McCrary, B.S., Edmondson, S.P., Shriver, J.W. & Wang A. H. (1998) The crystal structure of the hyperthermophile chromosomal protein Sso7D bound to DNA. *Nature Struct. Biol.* **5**, 782-786.
- Garvie, C.W. & Phillips, S.E.V. (2000) Direct and indirect readout in mutant Met repressor-operator complexes. *Structure Fold. Des.* **8**, 905-914.
- Gewirth, D.T. & Sigler, P.B. (1995) The basis for half-site specificity explored through a non-cognate steroid receptor-DNA complex. *Nature Struct. Biol.* **2**, 386-394.
- Ghosh, G., Van Duyne, G., Ghosh, S. & Sigler, P.B. (1995) Structure of NF-κB p50 homodimer bound to a κB site. *Nature* **373**, 303-310.
- Glasfeld, A., Koehler, A.N., Schumacher, M.A. & Brennan, R.G. (1999) The role of lysine 55 in determining the specificity of the purine repressor for its operators through minor groove interactions. *J. Mol. Biol.* **291**, 347-361.
- Guo, F., Gopaul, D.N. & Van Duyne, G.D. (1997) Structure of Cre recombinase complexed with DNA in a site-specific recombination synapse. *Nature* **389**, 40-46.
- Hegde, R.S., Grossman, S.R., Laimins, L.A. & Sigler, P.B. (1992) Crystal structure at 1.7 Å of the bovine papillomavirus-1 E2 DNA-binding domain bound to its DNA target. *Nature* **359**, 505-512.
- Hirsch, J.A. & Aggarwal, A. K. (1995) Structure of the even-skipped homeodomain complexed to AT-rich DNA: New perspectives on homeodomain specificity. *EMBO J.* **14**, 6280-6291.
- Hollis, T., Ichikawa, Y. & Ellenberger, T. (2000) DNA bending and a flip-out mechanism for base excision by the helix-hairpin-helix DNA glycosylase, *Escherichia coli* AlkA. *EMBO J.* **19**, 758-766.
- Horton, J.R., Bonventre, J. & Cheng, X. (1998a) How is modification of the DNA substrate recognized by the *PvuII* restriction endonuclease? *J. Biol. Chem.* **379**, 451-458.
- Horton, J.R. & Cheng, X. (2000) *PvuII* endonuclease contains two calcium ions in active sites. *J. Mol. Biol.* **300**, 1049-1056.
- Horton, N.C., Connolly, B.A. & Perona, J.J. (2000) Inhibition of EcoRV endonuclease by deoxyribo-3'-S-phosphorothiolates: a high-resolution X-ray crystallographic study *J. Am. Chem. Soc.* **122**, 3314-3324.
- Horton, J.R., Nastro, H.G., Riggs, P.D., & Cheng, X. (1998b) Asp34 of *PvuII* endonuclease is directly involved in DNA minor groove recognition and indirectly involved in catalysis. *J. Mol. Biol.* **284**, 1491-1504.
- Horton, N.C. & Perona, J.J. (1998a) Recognition of flanking DNA sequences by EcoRV endonuclease involves alternative patterns of water-mediated contacts. *J. Biol. Chem.* **273**, 21721-21729.
- Horton, N.C. & Perona, J.J. (1998b) Role of protein-induced bending in the specificity of DNA recognition: crystal structure of EcoRV endonuclease complexed with d(AAAGAT) + d(ATCTT). *J. Mol. Biol.* **277**, 779-783.

- Horton, N.C. & Perona, J.J. (2000) Crystallographic snapshots along a protein-induced DNA-bending pathway. *Proc. Natl. Acad. Sci., USA* **97**, 5729-5734.
- Horvath, M.M., Choi, J., Kim, Y., Wilkosz, P. & Rosenberg, J.M. (to be published) The integration of recognition and cleavage: X-ray structures of pre- transition state and post-reactive DNA-*Eco* RI endonuclease complexes.
- Hosfield, D.J., Guan, Y., Haas, B.J., Cunningham, R.P. & Tainer, J.A. (1999) Structure of the DNA repair enzyme endonuclease IV and its DNA complex: double-nucleotide flipping at abasic sites and three-metal-ion catalysis. *Cell* **98**, 397-408.
- Houbaviy, H.B., Usheva, A., Shenk, T. & Burley, S.K. (1996) Cocystal structure of YY1 bound to the adeno-associated virus P5 initiator. *Proc. Natl. Acad. Sci., USA* **93**, 13577-13582.
- Jacobson, E.M., Li, P., Leon-del-Rio, A., Rosenfeld, M.G. & Aggarwal, A.K. (1997) Structure of Pit-1 POU domain bound to DNA as a dimer: unexpected arrangement and flexibility. *Genes Dev.* **11**, 198 - 212.
- Keller, W., Koenig, P. & Richmond, T.J. (1995) Crystal structure of a bZIP/DNA complex at 2.2 Å: determinants of DNA specific recognition. *J. Mol. Biol.* **254**, 657-667.
- Kiefer, J.R., Mao, C., Braman, J.C. & Beese, L.S. (1998) Visualizing DNA replication in a catalytically active *Bacillus* DNA polymerase crystal. *Nature* **391**, 304-307.
- Kim, C.A. & Berg, J.M. (1996) A 2.2 Å resolution crystal structure of a designed zinc finger protein bound to DNA. *Nature Struct. Biol.* **3**, 940-945.
- Kim, Y., Geiger, J.H., Hahn, S. & Sigler, P.B. (1993) Crystal structure of a yeast TBP/TATA-box complex. *Nature* **365**, 512-520.
- Kim, Y., Grable, J.C., Love, R., Greene, P.J. & Rosenberg, J.M. (1990) Refinement of EcoRI endonuclease crystal structure: a revised protein chain tracing. *Science* **249**, 1307-1309.
- King, D.A., Zhang, L., Guarente, L. & Marmorstein, R. (1999a) Structure of a HAP1-DNA complex reveals dramatically asymmetric DNA binding by a homodimeric protein. *Nature Struct. Biol.* **6**, 64-71.
- King, D.A., Zhang, L., Guarente, L. & Marmorstein, R. (1999b) Structure of HAP1-18-DNA implicates direct allosteric effect of protein-DNA interactions on transcriptional activation. *Nature Struct. Biol.* **6**, 22-27.
- Kodandapani, R., Pio, F., Ni, C.Z., Piccialli, G., Klemsz, M., McKercher, S., Maki, R.A. & Ely, K.R. (1996) A new pattern for helix-turn-helix recognition revealed by the PU.1 ETS-domain-DNA complex. *Nature* **380**, 456-460.
- Koenig, P., Giraldo, R., Chapman, L. & Rhodes, D. (1996) Crystal structure of the DNA binding domain of yeast RAP1 in complex with a telomeric DNA site. *Cell* **85**, 125-136.
- Kosa, P.F., Ghosh, G., DeDecker, B.S. & Sigler, P.B. (1997) The 2.1- Å crystal structure of an archaeal preinitiation complex: TATA-box-binding protein/transcription factor (II)B core/TATA-box. *Proc. Natl. Acad. Sci., USA* **94**, 6042-6047.
- Kostrewa, D. & Winkler, F.K. (1995) Mg<sup>2+</sup> binding to the active site of *Eco*RV endonuclease: a crystallographic study of complexes with substrate and product DNA at 2 Å resolution. *Biochemistry* **34**, 683-696.
- Kumar, S., Horton, J.R., Jones, G.D., Walker, R.T., Roberts, R.J. & Cheng, X. (1997) DNA containing 4'-thio-2'-deoxycytidine inhibits methylation by HhaI methyltransferase. *Nucleic Acids Res.* **25**, 2773-2783.
- Lahm, A. & Suck, D. (1991) DNase I-induced DNA conformation. 2 Å structure of a DNase I-octamer complex. *J. Mol. Biol.* **222**, 645-667.
- Lau, A.Y., Wyatt, M.D., Glassner, B.J., Samson, L.D. & Ellenberger, T. (2000) Molecular basis for discriminating between normal and damaged bases by the human alkyladenine glycosylase, AAG. *Proc. Natl. Acad. Sci., USA* **97**, 13573-13578.
- Lawson, C.L. & Carey, J. (1993) Tandem binding in crystals of a trp repressor/operator half-site complex. *Nature* **366**, 178-182.

- Li, T., Stark, M.R., Johnson, A.D. & Wolberger, C. (1995) Crystal structure of the MAT $\alpha$ 1/MAT $\alpha$ 2 homeodomain heterodimer bound to DNA. *Science* **270**, 262-269.
- Li, T., Jin, Y., Vershon, A.K. & Wolberger, C. (1998a) Crystal structure of the MAT $\alpha$ 1/MAT $\alpha$ 2 homeodomain heterodimer in complex with DNA containing an A-tract. *Nucleic Acids Res.* **26**, 5707-5718.
- Li, Y., Korolev, S. & Waksman, G. (1998b) Crystal structures of open and closed forms of binary and ternary complexes of the large fragment of *Thermus aquaticus* DNA polymerase I: structural basis for nucleotide incorporation. *EMBO J.* **17**, 7514-7525.
- Li, Y., Mitaxov, V., Waksman, G. (1999) Structure-based design of *Taq* DNA polymerases with improved properties of dideoxynucleotide incorporation. *Proc. Natl. Acad. Sci., USA* **96** 9491-9496.
- Littlefield, O., Korkhin, Y. & Sigler, P.B. (1999) The structural basis for the oriented assembly of a TBP/Tfb/promoter complex. *Proc. Natl. Acad. Sci., USA* **96**, 13668-13673.
- Littlefield, O. & Nelson, H.C.M. (1999) A new use for the 'wing' of the winged helix-turn-helix motif in the Hsf-DNA cocrystal. *Nature Struct. Biol.* **6**, 464-470.
- Lukacs, C.M., Kucera, R., Schildkraut, I. & Aggarwal, A.K. (2000) Understanding the immutability of restriction enzymes: crystal structure of BglII and its DNA substrate at 1.5 Å resolution. *Nature Struct. Biol.* **7**, 134-140.
- Martin, A.M., Sam, M.D., Reich, N.O. & Perona, J.J. (1999) Structural and energetic origins of indirect readout in site-specific DNA cleavage by a restriction endonuclease. *Nature Struct. Biol.* **6**, 269-277.
- Mo, Y., Vaessen, B., Johnston, K. & Marmorstein, R. (1998) Structures of SAP-1 Bound to DNA targets from the E74 and c-fos promoters: insights into DNA sequence discrimination by ETS proteins. *Mol. Cell* **2**, 201-212.
- Mo, Y., Vaessen, B., Johnston, K. & Marmorstein, R. (2000) Structure of the elk-1-DNA complex reveals how DNA-distal residues affect ETS domain recognition of DNA. *Nature Struct. Biol.* **7**, 292-297.
- Mondragon, A. & Harrison, S.C. (1991) The phage 434 Cro/OR1 complex at 2.5 Å resolution. *J. Mol. Biol.* **219**, 321-334.
- Muller, C.W. & Herrmann, B.G. (1997) Crystallographic structure of the T domain-DNA complex of the *Brachyury* transcription factor. *Nature* **389**, 884-888.
- Murphy IV, F.V., Sweet, R.M. & Churchill, M.E.A. (1999) The structure of a chromosomal high mobility group protein-DNA complex reveals sequence-neutral mechanisms important for non-sequence-specific DNA recognition. *EMBO J.* **18**, 6610-6618.
- Najmudin, S., Cote, M.L., Sun, D., Yohannan, S., Montano, S.P., Gu, J. & Georgiadis, M.M. (2000) Crystal structures of an N-terminal fragment from Moloney murine leukemia virus reverse transcriptase complexed with nucleic acid: functional implications for template-primer binding to the fingers domain. *J. Mol. Biol.* **296**, 613-622.
- Newman, M., Lunnen, K., Wilson, G., Greci, J., Schildkraut, I. & Phillips, S.E.V. (1998) Crystal structure of restriction endonuclease BglII bound to its interrupted DNA recognition sequence. *EMBO J.* **17**, 5466-5476.
- Newman, M., Strzelecka, T., Dorner, L.F., ISchildkraut, I. & Aggarwal, A.K. (1995) Structure of BamHI endonuclease bound to DNA: partial folding and unfolding on DNA binding. *Science* **269**, 656-663.
- Nikolov, D.B., Chen, H., Halay, E.D., Hoffman, A., Roeder, R.G. & Burley, S.K. (1996) Crystal structure of a human TATA box-binding protein/TATA element complex. *Proc. Natl. Acad. Sci., USA* **93**, 4862-4867.
- Obmolova, G., Ban, C., Hsieh, P. & Yang, W. (2000) Crystal structures of mismatch repair protein MutS and its complex with a substrate DNA. *Nature* **407**, 703-710.
- Ohndorf, U.M., Rould, M.A., He, Q., Pabo, C.O. & Lippard, S.J. (1999) Molecular basis for recognition of cisplatin-modified DNA by high-mobility-group proteins. *Nature* **399**, 708-712.

- Orth, P., Schnappinger, D., Hillen, W., Saenger, W. & Hinrichs, W. (2000) Structural basis of gene regulation by the tetracycline inducible Tet repressor-operator system. *Nature Struct. Biol.* **7**, 215-219.
- Parikh, S.S., Mol, C.D., Slupphaug, G., Bharati, S., Krokan, H.E. & Tainer, J.A. (1998) Base excision repair initiation revealed by crystal structures and binding kinetics of human uracil-DNA glycosylase with DNA. *EMBO J.* **17**, 5214-5226.
- Parikh, S.S., Slupphaug, G., Krokan, H.E., Blackburn, G.M. & Tainer, J.A. (2000) Uracil-DNA glycosylase-DNA substrate and product structures: conformational strain promotes catalytic efficiency by coupled stereoelectronic effects. *Proc. Natl. Acad. Sci., USA* **97**, 5083-5088.
- Parkinson, G., Wilson, C., Gunasekera, A., Ebright, Y.W., Ebright, R.H. & Berman, H.M. (1996) Structure of the CAP-DNA complex at 2.5 Å resolution: a complete picture of the protein-DNA interface. *J. Mol. Biol.* **260**, 395-408.
- Parraga, A., Bellolell, L., Ferre-D'Amare, A.R. & Burley, S.K. (1998) Co-crystal structure of sterol regulatory element binding protein 1A at 2.3 Å resolution. *Structure* **6**, 661-672.
- Passner, J.M., Ryoo, H.D., Shen, L., Mann, R.S. & Aggarwal, A.K. (1999) Structure of a DNA-bound ultrathorax-extradenticle homeodomain complex. *Nature* **397**, 714-719.
- Passner, J.M. & Steitz, T.A. (1997) The structure of a CAP-DNA complex having two cAMP molecules bound to each monomer. *Proc. Natl. Acad. Sci., USA* **94**, 2843-2847.
- Patikoglou, G.A., Kim, J.L., Sun, L., Yang, S.-H., Kodadek, T. & Burley, S.K. (1999) TATA element recognition by the TATA box-binding protein has been conserved throughout evolution. *Genes Dev.* **13**, 3217-3230.
- Perona, J.J. & Martin, A.M. (1997) Conformational transitions and structural deformability of EcoRV endonuclease revealed by crystallographic analysis. *J. Mol. Biol.* **273**, 207-225.
- Piper, D.E., Batchelor, A.H., Chang, C.P., Cleary, M.L., Wolberger, C. (1999) Structure of a HoxB1-Pbx1 heterodimer bound to DNA: role of the hexapeptide and a fourth homeodomain helix in complex formation. *Cell* **96**, 587-597.
- Rastinejad, F., Perlmann, T., Evans, R.M. & Sigler, P.B. (1995) Structural determinants of nuclear receptor assembly on DNA direct repeats. *Nature* **375**, 203-211.
- Rastinejad, F., Wagner, T., Zhao, Q. & Khorasanizadeh, S. (2000) Structure of the RXR-RAR DNA-binding complex on the retinoic acid response element DR1. *EMBO J.* **19**, 1045-1054.
- Redinbo, M.R., Stewart, L., Kuhn, P., Champoux, J.J. & Hol, W.G. (1998) Crystal structures of human topoisomerase I in covalent and noncovalent complexes with DNA. *Science* **279**, 1504-1513.
- Rhee, S., Martin, R.G., Rosner, J.L. & Davies, D.R. (1998) A novel DNA-binding motif of MarA: the first structure for an AraC family transcriptional activator. *Proc. Natl. Acad. Sci., USA* **95**, 10413-10418.
- Rice, P.A., Yang, S.W., Mizuuchi, K. & Nash, H.A. (1996) Crystal structure of an IHF-DNA complex: a protein-induced DNA U-turn. *Cell* **87**, 1295-1306.
- Robinson, H., Gao, Y.G., McCrary, B.S., Edmondson, S.P., Shriver, J.W. & Wang, A.H. (1998) The hyperthermophile chromosomal protein Sac7d sharply kinks DNA. *Nature* **392**, 202-205.
- Rodgers, D.W. & Harrison, S.C. (1993) The complex between phage 434 repressor DNA-binding domain and operator site OR3: structural differences between consensus and non-consensus half-sites. *Structure* **1**, 227-240.
- Santelli, E. & Richmond, T.J. (2000) Crystal structure of MEF2A core bound to DNA at 1.5 Å resolution. *J. Mol. Biol.* **297**, 437-449.
- Sawaya, M.R., Prasad, R., Wilson, S.H., Kraut, J. & Pelletier, H. (1997) Crystal structures of human DNA polymerase β complexed with gapped and nicked DNA: evidence for an induced fit mechanism. *Biochemistry* **36**, 11205-11215.

- Schildbach, J.F., Karzai, A.W., Raumann, B.E. & Sauer, R.T. (1999) Origins of DNA-binding specificity: role of protein contacts with the DNA backbone. *Proc. Natl. Acad. Sci., USA* **96**, 811-817.
- Schwabe, J.W.R., Chapman, L., Finch, J.T. & Rhodes, D. (1993) The crystal structure of the estrogen receptor DNA-binding domain bound to DNA: how receptors discriminate between their response elements. *Cell* **75**, 567-578.
- Shimon, L.J. & Harrison, S.C. (1993) The phage 434 OR2/R1-69 complex at 2.5 Å resolution. *J. Mol. Biol.* **232**, 826-838.
- Su, S., Gao, Y.G., Robinson, H., Liaw, Y.C., Edmondson, S.P., Shriver, J.W. & Wang, A.H.-J. (2000) Crystal structures of the chromosomal proteins Sso7D/Sac7D bound to DNA containing T-G mismatched base-pairs. *J. Mol. Biol.* **303**, 395-403.
- Swaminathan, K., Flynn, P., Reece, R.J. & Marmorstein, R. (1997) Crystal structure of a PUT3-DNA complex reveals a novel mechanism for DNA recognition by a protein containing a Zn<sub>2</sub>Cys<sub>6</sub> binuclear cluster. *Nature Struct. Biol.* **4**, 751-759.
- Tan, S., Hunziker, Y., Sargent, D.J. & Richmond, T.J. (1996) Crystal structure of a yeast TFIIA/TBP/DNA complex. *Nature* **381**, 127-134.
- Tan, S. & Richmond, T.J. (1998) Crystal structure of the yeast MAT $\alpha$ 2/MCM1/DNA ternary complex. *Nature* **391**, 660-666.
- Thomas, M.P., Brady, R.L., Halford, S.E., Sessions, R.B. & Baldwin, G.S. (1999) Structural analysis of a mutational hot-spot in the EcoRV restriction endonuclease: a catalytic role for a main chain carbonyl group. *Nucleic Acids Res.* **27**, 3438-3445.
- Tucker-Kellogg, L., Rould, M.A., Chambers, K.A., Ades, S.E., Sauer, R.T. & Pabo, C.O. (1997) Engrailed (Gln50-->Lys) homeodomain-DNA complex at 1.9 Å resolution: structural basis for enhanced affinity and altered specificity. *Structure* **5**, 1047-1054.
- Van Pouderoyen, G., Ketting, R.F., Perrakis, A., Plasterk, R.H.A. & Sixma, T.K. (1997) Crystal structure of the specific DNA-binding domain of Tc3 transposase of *C. elegans* in complex with transposon DNA. *EMBO J.* **16**, 6044-6054.
- Viadiu, H. & Aggarwal, A.K. (1998) The role of metals in catalysis by the restriction endonuclease BamHI. *Nature Struct. Biol.* **5**, 910-916.
- Viadiu, H. & Aggarwal, A.K. (2000) Structure of BamHI bound to non-specific DNA: a model for DNA sliding. *Mol. Cell* **5**, 889-895.
- Vilkaitis, G., Dong, A., Weinhold, E., Cheng, X. & Klimasauskas, S. (2000) Functional roles of the conserved threonine 250 in the target recognition domain of HhaI DNA methyltransferase. *J. Biol. Chem.* **275**, 38722-38730.
- Weston, S.A., Lahm, A. & Suck, D. (1992) X-ray structure of the DNase I-d(GGTATACC)<sub>2</sub> complex at 2.3 Å resolution. *J. Mol. Biol.* **226**, 1237-1256.
- Wilson, D.S., Guenther, B., Desplan, C. & Kuriyan, J. (1995) High resolution crystal structure of a paired (Pax) class cooperative homeodomain dimer on DNA. *Cell* **82**, 709-719.
- Xu, H.E., Rould, M.A., Xu, W., Epstein, J.A., Maas, R.L. & Pabo, C.O. (1999) Crystal structure of the human Pax6 paired domain-DNA complex reveals specific roles for the linker region and carboxy-terminal subdomain in DNA binding. *Genes Dev.* **13**, 1263-1275.
- Xu, W., Rould, M.A., Jun, S., Desplan, C. & Pabo, C.O. (1995) Crystal structure of a paired domain-DNA complex at 2.5 Ångstroms resolution reveals structural basis for Pax developmental mutations. *Cell* **80**, 639-650.
- Zhao, Q., Chasse, S.A., Devarakonda, S., Sierk, M.L., Ahvazi, B. & Rastinejad, F. (2000) Structural basis of RXR-DNA interactions. *J. Mol. Biol.* **296**, 509-520.
- Zhao, Q., Khorasanizadeh, S., Miyoshi, Y., Lazar, M.A. & Rastinejad, F. (1998) Structural elements of an orphan nuclear receptor-DNA complex. *Mol. Cell* **1**, 849-861.

**Table S2. Nucleosome-positioning sequences**

**(i) Nucleosome-binding sequences from the mouse genome**  
*SET 1A A-tracts 1 (90%)*

Widlund, H.R., Cao, H., Simonsson, S., Magnusson, E., Simonsson, T., Nielsen, P.E., Kahn, J.D., Crothers, D.M. & Kubista, M. (1997) Identification and characterization of genomic nucleosome-positioning sequences. *J. Mol. Biol.* 267, 807-817.

|        |        |                                                                                                                                                      |
|--------|--------|------------------------------------------------------------------------------------------------------------------------------------------------------|
| phen4  | 122 bp | TAGGACCTGG AGTATGGCGA GAAAAC TGAA AATCACAGAA AATGAGAAAT<br>ACACACTTTA GGATGTGAAA TATGGCGAGG AAAACTGAAA AAGGTGGAAA<br>ATTCAGAAAT GTCCACTGTA GG        |
| phen8  | 127 bp | AGGACCTGGA ACATGGTGAG AAAACTGAAA ATCACAGAAA ATGAGAAATA<br>GACACTTTAG GACGTGAAAT ATGACGAGGA AAACAGAAAA AGTTGGAAAA<br>TTTAGAAATG TCTAACGTAG GACGTGG    |
| phen12 | 123 bp | TGAAGGACCT GGAATATGGC GACGGAAAAC TGAAAATCAC GGAAAATGAG<br>AAATACACAC TTTACGACGT GAAATATGGC GAGGAAAAC TATAAAGGTG<br>GAATATTTAG AAACGTCCAC TGT         |
| phen14 | 125 bp | AGGGACATGG AATATGGAGA GAAAAC TGAA AATCACGGAA AATGAAAAAT<br>ACACACTTTA GGACGTGAAA TATAGCGAGG AAAACTGAAA AAGGTGGAAAT<br>ATTTAGAAAT GTCCACTGTA GGACG    |
| phen17 | 120 bp | CCGGAATATG GCGAGAAAAC TGAAAATCAC GTAAAATGAG AAATACACAC<br>TTTAGGACGT GAGATATCGC GAGGAAACCT GAAAAAGGTG GAAAATTTAG<br>AAATGTCACA GTAGGACGTG            |
| phen18 | 125 bp | TGACCTGGAA TATGGCGAGA AACCTGAAAA TCACGCAAAA TGAGAAATAC<br>ACACTTTAGG ACATGAAATA TGGTGAGGAA AATTGAAAAA GGTGGAATAT<br>TAAGAAATGT CCACTGTAGG ACGTG      |
| phen21 | 129 bp | TGAAGGACCT GGAATATGGC GAGAGAACTG AAAATCACCG AAAATGAGAA<br>ATACACACTT TAGGACGTGA AATATGGCGA GGAAAAC TGA AAAAGATGGA<br>AAATTTAGAA ATATCCACTG TAGGACGTG |
| phen22 | 118 bp | AATGTGGCGA GAAAAGTGAA AATCACGGAA AATGAGAAAT AAACACTTTA<br>GGAAGTGAAA TATGGCGAGG AAAACTGAAA AGGATGGAAA ATTTAGAAAT<br>GTCCACTGTA GGACGTGG              |
| phen23 | 125 bp | GAGGACCTGG AATATGGTGA GAAGACTGAA AATCACGGAA AATGAGAAAT<br>ACACACTTTT GGACGTGAAA TATGGCGAGG AAAACTGAAA AAGGTGGAAA<br>ATTTAGAAAT GTCCACTGTA GGACG      |
| phen24 | 111 bp | AGAGAAAACC GAAAATCACG GAAAATGAGA AATACGCACT TTAGGACGTG<br>AAATATGGCG AGGAAAAC TGA AAAAAGGTGG AAAATTTAGG GATGTCCACT<br>GTAGGACGTG G                   |
| phen26 | 127 bp | AGGACCTGGA ACATGGCGAG AAAACTGAAG ATCACGGAAA ATGAGAAATA<br>CACACTTTAG GGCGTGAAAT ATGACGAGGA AAACTGAAAA AAGGTGGAGAA<br>TTTAGAAATG TCCACTGTAG GACGTGG   |

|        |        |                                                                                                                                                     |
|--------|--------|-----------------------------------------------------------------------------------------------------------------------------------------------------|
| phcn29 | 120 bp | GGAATATGGC GAGAAAACAG AAAATCACGG GAAATGAGAA ATACACACTT<br>TAGGACGTGA AATATAGCGA GGGGAACTGA AAAAGGTGGA AAATTTAGAA<br>ATGTCCGCTG TAGGACGTGG           |
| phcn39 | 128 bp | AGAGGACCTG GAATATGGCG AGAAAACCTGA AAATCACGGA AAATGAGAAA<br>TACACACTTT AGGACATGAA ATATGGCGAG GAAAACCTGAA AAAGGTGGA<br>AATTGAGAAA TGCCACTGTA GGACGTGG |
| phcn43 | 119 bp | AGGACCTGGA ATATGGCGAG AAAACTGAAA ATCACGGAAA ATGAGAAACA<br>CGCGCTTAAG GACATGAAAT ATGGCGAGAA AAACTGAAAA AGGTGGAATA<br>TATAGAAATG TCCACTGTA            |
| phcn46 | 126 bp | ATGCACACTG TAGGACCTGG AATATGGCGA GAAAACCTGAA AATTAAGGAA<br>AATGAGAAAT ATACACTTTA GGACGTGAAA TATGGCGAGG AGGACTGAAA<br>GAGGTGGAAA ATTTAGATAC GTCCAC   |
| phcn47 | 128 bp | AAGGACCTGG AATATGACGA GAAAACCTGAA AATCACGGAA AATGAGAGAT<br>ACACACTTTA GGACGTGAAA TATGGCGAAG AAAACTGAAA AGGTCGGAAA<br>ATTTAGAAAT GTCCACCGTA GACGTGGA |
| phcn50 | 109 bp | AGAGAACTGA AAATCACCGA AAATGAGAAA TACACGCTTT AGGACGTGAA<br>ATATGGCGAG GAAAACCTGAA AAAGTGGAAA ATTTAGAAAT GTCCACTGTA<br>GGACGTGGT                      |
| phwn12 | 126 bp | GACCTGGAAA ATGGCGAGAA AACTGAAAAT CACGAAAAT GTGAAATACA<br>CACTTTAGGA CATGAAATAT GGCGAGGAAA ATTGAAAAAG TTGGATAATT<br>TAGAAATGTC CACTGTAGGA CGTGA      |



*SET 1B A-tracts 2 (81%)*

Widlund, H.R., Cao, H., Simonsson, S., Magnusson, E., Simonsson, T., Nielsen, P.E., Kahn, J.D., Crothers, D.M. & Kubista, M. (1997) Identification and characterization of genomic nucleosome-positioning sequences. *J. Mol. Biol.* 267, 807-817.

|        |                     |                                                                                                                                                    |
|--------|---------------------|----------------------------------------------------------------------------------------------------------------------------------------------------|
| phcn2  | 126 bp              | TAGGACGTGG AATATGGCAA GAAAAC TGAA AATCATGGAA AATGATAAGC<br>ATCCACTTGA CGACTTGAAA AATGACGAAA TCACTAAAAA ACGTGAAAAA<br>TGAGAAATGC ACACTGGAGG ACCTGG  |
| phcn10 | 125 bp              | AGAACGTGGA ATAAGGCAAG GAAACGGAAA ATCATGGAAA ATGAGGAACA<br>TCCAATTGAC GACTGGAAAA ATGACGAAAT CACTAAAAAA CGTGAAAAAT<br>GAGAAATGGA CACTGAAGGA CCTGG    |
| phcn13 | 119 bp <sup>†</sup> | AGGACGTGAA AATTGGCGAGA AACTGGAAAAG GTGGAATATT TAGAGATGTG<br>CACTGTAGGA CGTGGAAATAT GGCAAGAAAAG TGAAAAGCAT GGAAAATGAG<br>AAACATCCAC TTGACGATT       |
| phcn20 | 126 bp              | TAGGACGTGG AATATGGCAA GAAAAC TGAA AATCATGGAA AATGAGAAAC<br>ATCCACTTGA TGACTTGAAA AATGACGAAA TCACTAAAAA ACGTGAAAAA<br>TGAGAAATGC ACACTGAAGG ACCTGA  |
| phcn30 | 126 bp              | TGACGACTTG AAAAATGACG AGATCACTAA AAAATGTGAA AAATGAGAAA<br>TGCACACTGA AGGAGCTGGA ATATGGTGGG AAAACTGGAA ATTACGGAAA<br>ATGAGAAATA CACACTTTAG GACGTG   |
| phcn42 | 126 bp              | AGGACGTGGG AGTATGGCAA GAAAAC TGAA AGTCATGGAA AGTGAGAAAC<br>ATCCACTTGA TGACTTGAAA AATGACGAAA TCACTGAAAG ACGTGAAAAA<br>TGAGAAATGCA CACTGTAGGA CATGGA |
| phwn8  | 119 bp              | ATGGCAAGAA AACTGAAAAT CATGGAAAAT GAGAAACATC CACTCGACGA<br>CTTGAAAAGAT GACGAAATCA CTAGAAAACG TGAAAAATGA GAAATGCTCA<br>CTGAAGGACC TGAATATGG          |
| phwn26 | 124 bp              | TAGGACGTGG AATATGGCAA GAAATCTGAA AATCATGGAA AATGAGAAGC<br>ATCCACTTGA TGACTTGAAA ATGACGAAAT CACTAAAAAA ACGTGAAAAAT<br>GAGAAATGCA CACCGTAGAC CTGG    |
| phwn27 | 121 bp              | AGGACGTGGA ATACGGCAAG AAAACTGAAA ATCATGGAAA ATGAGAAACA<br>TCCACTTGAC GACTTGAAAA ATGACGAAAT CACTAAAAAA ACGTGAAAAAT<br>GAGAGATACA CACTGAAGGC C       |

<sup>†</sup> Chain length without space reported in sequence dataset of M. Kubista.

*SET 1C A-tracts 3 (72%)*

Widlund, H.R., Cao, H., Simonsson, S., Magnusson, E., Simonsson, T., Nielsen, P.E., Kahn, J.D., Crothers, D.M. & Kubista, M. (1997) Identification and characterization of genomic nucleosome-positioning sequences. *J. Mol. Biol.* 267, 807-817.

|        |        |                                                                                                                                                             |
|--------|--------|-------------------------------------------------------------------------------------------------------------------------------------------------------------|
| phen3  | 123 bp | ACGTGAAAAA TGAGAAATGC AACTGAAGG ACCTGAAATA TGGCGAGAAA<br>ACTGAAAATC ACGGAAAATG AGAAATACAC ACTTTAGGAC GTGAAAATATG<br>GCGAGGAAAA CTGACAAAGG CGG               |
| phen7  | 118 bp | AGAAAAGTGA AAATCACGGA AAATTAGAAA TACACACTTT AGGACGTGAA<br>ATATGGCGAG GAAAATGGAA AAAGGTGGAA AATTTAGCAG TGTCCACTGT<br>AGGAGGTGGA ATATGGCA                     |
| phen9  | 136 bp | AGGACGTGCA ATAAGGCAAG AAAACTGAAA ATCATGGAAA ATGAGAAACA<br>TCCACTTGAC GACTTGAAAA ATGACAAAAT CACTAAAATA CGTGAAAAAT<br>GAGAGATGCA CCCTGAAGGA CCTGGAATAT GGCGAG |
| phen11 | 124 bp | ATGGCTAGAA AACTGAAAAT CATGGAAAAA GAGAAACATC CACTTGACGA<br>CTTGAAAAAT GTCGAAATCA CTAAAAAACG TGAAAAATGA GAAATGCACA<br>CTGAGGGACC TGGAAATATGG CGAG             |
| phen19 | 129 bp | ATGGCGAGAA AACTGAAGTT CACGGAAAAT GGAGAAATAC ACACTTTAGG<br>ATGCAGTGAA ATATTGAGCG AAGGAAAAC TAAAAAGGTG GAAAAATTTAG<br>AAATGTCCAC TGTAGGACGA GGAATATGG         |
| phen28 | 122 bp | AGAAAAGTGA AAATCACGGA AAATGAGGAA TACACACTTT AGGACGTGAA<br>ATATGGCGAG GAAAAGTGA AAAGTGGGAA AATTTAGAAA TGTCCACTGT<br>AGGATCGTGG AATATAGCAG GC                 |
| phen37 | 117 bp | AGAACACTGA AAATCACGGA AAATGAGAAA TACACACTTT AGGACGTGAA<br>ATATGGCGAG GAAAAGTAAA AAAGGTGGAA AATTTAGAAA TGTCCACTGT<br>AGGACGTGGA ATATGGC                      |
| phen44 | 123 bp | ATGGCGAGAA AACTGAAAAT CACGGAAAAT GAAAAATACA CACTTCAGGA<br>CGTGAAAATAT GGCGAGGAAA ACTGAAAAAG GTGGAAAATT TAGAAATGTC<br>CACTGTAGGA CGTGAATAT GGC               |
| phwn11 | 123 bp | ATGGCGAGAA AACTGCAAAT CACGGAGAAT GAGAAATACA CACTTTAGGA<br>CGTGAAGTAT GGCGAGGAAA ACTGAAAAAG GTGGAAAATT TAGAAATGTC<br>CGCTGTAGGA CGTGAATAT GGC                |
| phwn29 | 136 bp | AGGACGTGCA ATAAGGCAAG AAAACTGAAA ATCATGGAAA ATGAGAAACA<br>TCCACTTGAC GACTTGAAAA ATGACAAAAT CACTAAAATA CGTGAAAAAT<br>GAGAAATGCA CCCTGAAGGA CCTGGAATAT GGCGAG |
| phwn36 | 120 bp | TGAAAAATTA GAAACATCCA CTTGATGACT TGAATAATGA CGAAATCACT<br>AAAAAACGTG AAAGATGAGA AATGCACACT GAAGGACCTG GAATATGGCG<br>AGAAAAGTGA AAATCACGGA                   |

## SET 2 TG/CTG RUNS (47%)

Widlund, H.R., Cao, H., Simonsson, S., Magnusson, E., Simonsson, T., Nielsen, P.E., Kahn, J.D., Crothers, D.M. & Kubista, M. (1997) Identification and characterization of genomic nucleosome-positioning sequences. *J. Mol. Biol.* 267, 807-817.

|        |        |                                                                                                                                                                            |
|--------|--------|----------------------------------------------------------------------------------------------------------------------------------------------------------------------------|
| phen31 | 141 bp | GCATGCATGC ATACACGCAT GTATACGAAC ATGTACACAC ATACTCATGA<br>ACACGCATAC ACGCGCACAT ATGCATACAT GCTTGTATAC ACACATGTAT<br>ACGAACATGT GTACACATAC TCATAAACAC TCACACACAC C          |
| phen32 | 125 bp | TACACACACA CCACATCATG CATAACACACA CATCAATGCA ATGCATACAC<br>ACATACATAC ACATACTAAC ACATACTACTC ACACACACGC AGAAATTATG<br>CATGCATCAT CGACATTGGC ACGCA                          |
| phen33 | 133 bp | TACACACACT AACACACACA CATGCACACA TACACACAGA CACATGCACA<br>TATACACACA CATAACACACG CATAACACACA CATAACACACA CATATACACA<br>CACATGCACA CTTACACACA CATGCACACA CAC                |
| phen40 | 151 bp | AGCACTGTGA CAACACAGTG GAGCAGCTTA ACACCACAGT GTAGCACTAT<br>GACATCAGAG TTGAGCACTG TGTCACTACT CAGAGAATA TGACTACTA<br>GTAGAGCACT GTAACATCAC AGTCGAGCAC TGTAACACCA CATATGCGCA T |
| phwn2  | 128 bp | GAGAGTAACA TAGGCACAGG TGTGGAGAGT AACACAGGCA CAGGTGTGGA<br>GAGTACACAC AGGCACAGGC GTGGAGAGTA CACACAGGCA CAGGTGTGGA<br>GAGCACACAC AGGCACAGGT GTGGAGAG                         |
| phwn3  | 139 bp | CACTGTGACA ACAATGTGGA ACATTGTGAC ATCACAGTGG CGAACAGTGA<br>CGGAACAGTA AAGGAGTCTG ACAGTACAGT GGAAAACAGT GACGGAACTG<br>TGGAGCACTG TGATTACACC ATGGGACATG TTGCACCAC             |
| phwn4  | 124 bp | GAGAGTAACA CAGGCACAGG TGTGGAGAGT AACACAGGCA CAGGTGTGGG<br>AGAGTGACAC ACAGGCACAG GTGAGGAGAG TACACACAGG CACAGGTGTG<br>GAGAGCACAC ACAGGTGCGG AGAG                             |
| phwn7  | 132 bp | AGCAGCAGCA GCAACAGTAG TAGAAGCAGC AGCACTAACG ACAGCACAGC<br>AGTAGCAGTA ATAGAAGCAG CAGCAGCAGC AGTAGCAGTA GCAGCAGCAG<br>CAGCAGCAAT TTCAACAACA GCAGCAGCAG CT                    |
| phwn10 | 127 bp | AGACCTTGTC TCAACACACA CACACACACA CACACACACA CACACACGCG<br>CGCACACACA CGCACACACA CATATGCACA CACACACGCA CACGCACACA<br>CACATGCACA CGCGCACGTG CACACAC                          |
| phwn13 | 134 bp | CACACACACA TACTCACACA CCTGTACCAC ACACACACAT GCACATATCT<br>GCACCACACA CAAACACATG CGTGTACACA CACATACTCA CACCTGTACC<br>ACACACACAC ATGCACACAT CCGCACCACA CGCA                  |
| phwn14 | 128 bp | CTTCCTCATG CATGAGCTTG CATGAGCTTG CATATGCTCA CATAACACAC<br>ATGTGAGTCT ACACACAATG AGCACACACA CACACACACA CATCACTAAC<br>CGTCTCGGTC TGGCCATCAT AGTCTGGC                         |
| phwn15 | 133 bp | CACACACACA CACCACATAC ACACACACAC CACATACACA CACACACACT<br>ACATACACAC ACACACATTC ACGCACACAC ACATACACAT ACACACACAC<br>ACCACATACA CACACATACA CACCACATAC ACA                   |

|                     |        |                                                                                                                                                                 |
|---------------------|--------|-----------------------------------------------------------------------------------------------------------------------------------------------------------------|
| phwn16              | 140 bp | CACTGTGACA ACAATGTGGA ACATTGTGAC ATCACAGTGG CGAACAGTGA<br>CAAAGCAGCA AAGGAGTCTG ACAGCACAGT GGAAAACAGT GACAGCAGAC<br>TGTGAGCACA GTGATTGCAC CATGGAGCAT ACTACACCAC |
| phwn17              | 139 bp | GAGCACCTGT GACACCACAA GGGGGCCTTG TGACTGCACA GAGGGGCACT<br>GTGTCACAAC AGTGGAATGC TGTGACAGTA CAGTGGAGCA GTGTGACAAA<br>ACAGTGGAGT ACTGTGACAC AATAGTAGGG CAATATGAC  |
| phwn18              | 128 bp | ATGCGCAGAC GCACACACAT GAGCATGCGC AGACGCACAT ACATGAGCGT<br>ACGCAGACGC ACACACATGA GCATGCGCGC GCGACACACA CACACACACA<br>CACACACACA CGAGTGGCAA GGCGGGGG              |
| phwn20              | 122 bp | ATGCGCTGAC GCACACACAT GAGCACGCGC AGACGCACAT ACATGAGCGT<br>ACGCAGACAC ACACACATGA GCATGCGCGC GCGACAACAC ACACGCTCAC<br>ACACACGAGT GGCAAGGCGG GG                    |
| phwn22              | 131 bp | CAATGTGACA TTACATGTAG CATGGTGAAA TCCCAGTGGA ATACTGTGAC<br>ACCACATTGG AGCACAATGA CACCACTGTG GAGCATGTGA CACCACAGTG<br>GAGCACTGTG AAACCTCAGT GGAGCACTGG T          |
| phwn23              | 126 bp | GCAGTGCTCA CATAACGCGC ACACATACAG TGCTCCATAT AGTGCACACA<br>TACAGTGAC ACATACGGTG CTCACGTACA GTGCTCACAT ACAGTGTACA<br>CATAACGTAC ACACATACAC TGCACA                 |
| phwn24              | 139 bp | CACTGTGACA ACAATGTGGA ACATTGTGAC ATCACAGTGG CGAACAGCGA<br>CAAACAGTA AAGGAGTCTG ACAGCACAGT GGAAAACAGT GACAGAAGTG<br>TGGAGCACTG TGATTGCACC ATGGAGCATG TTACACCAC   |
| phwn25              | 134 bp | ATGCGCAGAC GCACACACAT GAGCATGCGC AGGCGCACAT ACATGAGCAT<br>ACGCAGACGC ACACACATGA GCATGCGCGC GCACACACAC ACACACACAC<br>ACACACACAC ACACACACGA GTGGCAAGGC GGGG       |
| phwn28              | 139 bp | CACTGTGACA ACAAAGTGGA ACATTGTGAC ATCACAGTGG CGAATAGCGA<br>CAAACAGTA ACGGAGTCTG ACAGCACGGT GGAAAACAGT GACAGAAGTG<br>TGGAGCACCG TGGTTGCACC ATGGAGCATG TTACGCCAC   |
| phwn30              | 131 bp | CAATGTGACA TCACATGTAG CATGGTGAAA TCCCAGTGGA ATACTGTGAC<br>ACCACATTGG AGCACAGTGA CGCCACAGTG GAGCATGTGG CACCACAGTG<br>GAGCACTGTG AAACCACAGT GGAGCACTGG G          |
| phwn32 <sup>†</sup> | 138 bp | TGCCAGATGA CACGTGCTAT GCCCAGGTGA CACAAGCTAT GCCCAGATGA<br>TACGTGCTAT GCCCAGGTGA CACATGCTAT GCCCAGGTGA CACATGCTAT<br>GCCCAAGTGA CACATGCCAT GCCAGGTGAC ACAAGCTA   |

<sup>†</sup> Reverse complement of unlabeled file in sequence dataset of M. Kubista.

*SET 3 Phased TATA (96%)*

Widlund, H.R., Cao, H., Simonsson, S., Magnusson, E., Simonsson, T., Nielsen, P.E., Kahn, J.D., Crothers, D.M. & Kubista, M. (1997) Identification and characterization of genomic nucleosome-positioning sequences. *J. Mol. Biol.* 267, 807-817.

|        |        |                                                                                                                                                  |
|--------|--------|--------------------------------------------------------------------------------------------------------------------------------------------------|
| phen5  | 123 bp | AGGTCTATAA GCGTCTATAA ACGTCTATAA ACGTCTATAA GCGTCTATAA<br>ACGCCTATAA GCGCCTATAA ACGCCTATAC GAGCCTATAA ACGCCTATAC<br>ACGGCTATAC ACGTCTATAC ACG    |
| phen25 | 126 bp | AGGTCTCTAA GCGTCTAAAA ACGCCTATAA ACGTTTATAA ACGTCTATAA<br>ACGCCTACAA ACGCCTATAA ACGCCTATAC AAGCCTATAA ACGCCTGTAC<br>ACGTCTACAC ACGTCTATAC ACGTCT |
| phen41 | 126 bp | AGGTCTATAA GCGTCTATAA GCGTCTATGA ACGTCTATAA ACGTCTATAA<br>ACGCCTATAA ACGCCTATAA ACGCCTATAC AAGCCTATAA ACGCCTATAC<br>ACGTCTATGC ACGACTATAC ACGTCT |
| phen49 | 126 bp | AGGTCTATAA GCGTCTATAA ACGTCTATAA ACGTTTATAA ACGTCTATAA<br>ACGCCTATAA ACACCTATAA ACGCCTATAC AAGCCTATAA ACGCCTATAC<br>ACGTCTATAC ACGCCTATAC GCGTCT |

*SET 4 phased TG/CA (96%)*

Widlund, H.R., Cao, H., Simonsson, S., Magnusson, E., Simonsson, T., Nielsen, P.E., Kahn, J.D., Crothers, D.M. & Kubista, M. (1997) Identification and characterization of genomic nucleosome-positioning sequences. *J. Mol. Biol.* 267, 807-817.

|                     |        |                                                                                                                                                  |
|---------------------|--------|--------------------------------------------------------------------------------------------------------------------------------------------------|
| phen6               | 126 bp | ATTTGTAGAA CAGTGTATAT CAATGAGTTA CAATGAAAAA ACATGGAGAA<br>TGATAAATAC CACACTGTAG AACATATTAG ATGAGTGAGT TACGCTGAAA<br>AACACATACG TTGGAAACCG GCATTG |
| phen16              | 123 bp | ATTTGTAGAA CAGTGTATAT CAATGAGCTA CAATGAAAAT CATGGAAAAT<br>GATAAAAACC ACACTGTAGA ACATATTAGA TGAGTGAGTT ACACTGAAAA<br>ACACATCCGT TGGAAACCGG CAT    |
| phen27              | 126 bp | AACAGGATTT GTAGAACAGT GTATATCAAT GAGTTACAAT GAGAAACGTG<br>GAAAATGATA GAAACCACAC TGTAGAACAT ATTATCTGAG TGAGTTACAC<br>AGAAAAACAC ATTCGTTGGA AACGGG |
| phen48 <sup>†</sup> | 118 bp | ATGTAGGACA GTGTATATCA ACGAGTTACA ATGAGAAACA TGGAAAATGA<br>TAAAAACCAC ACTGTAGAAC AGATTAGATG AGTGAGTTAC ACTGAGAAAC<br>ACATTCGTTG GAAACGGC          |

<sup>†</sup> DNA-binding site for CENP-B

## SET 5 No sequence (40%)

Widlund, H.R., Cao, H., Simonsson, S., Magnusson, E., Simonsson, T., Nielsen, P.E., Kahn, J.D., Crothers, D.M. & Kubista, M. (1997) Identification and characterization of genomic nucleosome-positioning sequences. *J. Mol. Biol.* 267, 807-817.

|        |                      |                                                                                                                                                                         |
|--------|----------------------|-------------------------------------------------------------------------------------------------------------------------------------------------------------------------|
| phcn1  | 144 bp <sup>†</sup>  | GGCGGGTAAT TGAGCATCAG TAGGTATAGC TAAGCGGGAT GCGATAGTAG<br>CAATAGCGTC AACAAAGAGGA TAGTGGTGAG CAGAGACGTG CTGCGCGCTA<br>CAATTGGCGT GGCAGTAATA GTCCTGTTTA GTAACCTCGGT CTTG  |
| phcn15 | 145 bp <sup>†</sup>  | CGGGAGTAGA ATGCAAGCGA GGCCGGTACG AGCTAAAGAA TGCCTGATGC<br>AGGGATAAAC GTGAACCGTT ATACAGAAAA ATGCAGATAG AGTGACTAAC<br>GGCGAGCTTA CTGCCACGCG TTGAGAGCCA GCACCGGACA CGATA   |
| phcn34 | 125 bp <sup>†</sup>  | CAGCCCCGGC CTTGAACTAT AGAGCAGCTG AAGATAACTT TGAATTTCTG<br>ACCCCTCTAC CTCTACCTCA CGAATGTTAG GACTACAGGT GAATGCCACC<br>ACACCCCTACT TAACACAGTG ACCAA                        |
| phcn35 | 145 bp <sup>†</sup>  | GTGAGCTGTG CGGAAGCAAA AGGAAAGCGA TTAACGGTGT GCTGCATGAT<br>AGTAAGTTAT GCCGCGGACA AGCAGCGTCG AAGCACCGGC GATGGCACAG<br>CTGGCACTAA GGCCGGTGGT ATCAGAAGCT CCTGACAGCT TAGGG   |
| phcn36 | 146 bp <sup>†</sup>  | GGCGAAAGCG GTGAACAGTG GGTCGGAGCC CATTATATTG GTTGAGAGGG<br>CATTGAGACC ACGCCAACAA AACATTGGTT GCATGTGATA GTTTAACCAAG<br>CGAATGACTC GATAAGTCTT AAGATAACGG GCGTATTGGT CGTTTG |
| phcn38 | 144 bp <sup>†</sup>  | GTGAGCTGTG CGGAAGCAAA AGGAAAGCGA TTAACGGTGT GCTGCATGAT<br>AGTAAGTTAT GCCGCGGACA AGCAGCGTCG AAGCACCGGG ATGGCACAGC<br>TGGCACTAAG GCCGGTGGTA TCAGAAGCTC CTGACAGCTT AGGG    |
| phcn45 | 144 bp <sup>†E</sup> | AGAGGGCGGG TGATATGGAA TCGGGGCCAA TGCGCAGTTT AAGGTTACAG<br>ATTAGGAGTG CGCGCGGAGC TGTAAGCTCG TCGAGCGTCC ATTGGCTAGG<br>TGGAAGTGGA TAGAGGCGTC GAGGGTCCGG ACCAGGTAGC GTTG    |
| phwn1  | 134 bp <sup>†</sup>  | GCGGAGGGTG GGGCAATGGG AGCTGCGCAG CAAATACTCC GTCATCAGGG<br>GTTAGCCGCG TGTAGCAATG GAGCTGGTAG CAGGCACGAA TGACTCGGGT<br>TTGGGTGTAA CCTGAATAGC GGCTGTAGTC GTCG               |
| phwn5  | 144 bp <sup>*</sup>  | GAGGACAAGA GCACCTAACT AACTAAAGC CGGACCGTTG GCGCTCACCC<br>TGTGGTGATC AATCTCCCAC CACGCTTTCC ACCTGACAGC GCAGAGTATC<br>CCAGTCAATA TAGTTCCGCA TCAAGACAGA AACGTCAATG ACCC     |
| phwn6  | 140 bp <sup>§</sup>  | CGGGACAGTG TCGACAAGCA AAGGCGTAGG CCTACCGAGA GGCGTGGGAG<br>CAGTGGTAAT CAGGGCAGCG GCGCGAATAG CGTACGTAGC GGGTGTGAGC<br>TATTACAGGC GTTACGATGC CCTATGTCCG GTGTGCGAGC         |
| phwn9  | 127 bp <sup>*</sup>  | AGGGAGGGTT CTGACCTCAG AACTCAGGAG GTGGATCAGA GCCCCAGACT<br>GCTAGACACA TGCCCTGAAA GAGGAAAGCT TGCCCTGCAGA GAGTGCTCTG<br>ACCACTGGAA CTCAGGAAAG AGCTAGT                      |
| phwn19 | 137 bp <sup>*</sup>  | TGTGAACAAC CAATCAACGG TGGCAGTGCA GCATGGTCTA TCAGGTTGTA<br>CAGGCCAGAG CGAGACTAAA ATCAATTCCA CACAAACCCT CTTACCAACG<br>TTAGGACCAT GATCTCTCGC ATCTCCCCC AACCCCG             |

|        |                     |                                                                                                                                                                         |
|--------|---------------------|-------------------------------------------------------------------------------------------------------------------------------------------------------------------------|
| phwn21 | 146 bp <sup>*</sup> | ACTCAAAGAA CAAAGATCCT GCTAACCACG GCATTAGGGA ACGGGCGGTA<br>CCGATGCCGT TCTGGTCGAC AGCGCATAGC CCCGGTCCAA CTCCGTGCGG<br>CCTAGAACGT TACGTACCCT AGATGCAGCG GAACTCTTGC GTGTCTG |
| phwn31 | 144 bp <sup>§</sup> | CGGGCAGTAT TGCGCACGAA CAAGGTTACT TTTGAAGACC ACATCTGTAC<br>ATCTGGGTAG AGCAGGAAAG CAATTGGTGT GAAGTCATTG GCGTTGCTGC<br>ACAGACCAGC GTCACAGTCG TTAGGGAGCC GGAATGCTAT CTGG    |
| phwn33 | 124 bp <sup>*</sup> | GGGCTGTAGA ATCTGATGGA GGTGTAGGAT GGATGGACAG TATGACAAAA<br>GGGTACTAGC CTGGGACAGC AGGATTGGTG GAAAGGTTAC AGGCAGGCC<br>AGCAGGCTCG GACGCTGTAT AGAG                           |
| phwn34 | 142 bp <sup>*</sup> | AAGACAAAAT ATGCACGATG TCACATGCAG GACCGCCGAT TGTATTGATA<br>CCATTACGTT ATGCGTGGAC GTCGGCTGTA GTCCTAAGCG CACCCCGACC<br>GAGTTCTGTG TACGAAACCT ACCAGCTCCT TCGACGCGAT GT      |
| phwn35 | 145 bp <sup>§</sup> | GCGGATAACA ATTTACATA GGAAACAGCT ATGACCATGA TTACGCAAGC<br>GCGCAATTAA CCCTCACTAA AGGGAACAAA AGCTGGAGCT CCACGCGGTG<br>GCGGCCGCTC TAGCCCGGC GGATCCCGAG CTGTTTCCTG TGTA      |
| phwn37 | 136 bp <sup>*</sup> | TAGACCAGGT GAGCAGGAGG CGGACAGCAG GGAACAGTCT GGAGGGCAGG<br>AAAGAGCTCT GAGGAGCCAT AGCGGGTAAA GCTGAGGATG GGTTTAAGCA<br>AAAGCCAGAC CAAGGACAGG AGGATGTGCA CACTGC             |

<sup>†</sup> Reverse complement of unlabeled file in sequence dataset of M. Kubista.

<sup>‡</sup> Chain length with extra space removed.

<sup>\*</sup> Sequence included in M. Kubista list of Set5 sequences and in table.

<sup>§</sup> Sequence not included in list of Set5 sequences in M. Kubista dataset (but in table).



**(ii) Anti-selection sequences from the mouse genome<sup>†</sup>***TGGA Fragments*

Cao, H., Widlund, H. R., Simonsson, T. & Kubista, M. (1998) TGGA repeats impair nucleosome formation.  
*J. Mol. Biol.* 281, 253-260.

|    |        |                                                                                                                                                  |
|----|--------|--------------------------------------------------------------------------------------------------------------------------------------------------|
| 35 | 105 bp | ATCATGGTGA TGTGATGAT GATGATGATG ATGGTGATGA TGATGATGGT<br>GATGGCGATG ATGATGATGA TGGATGGCGA TGGTGATAAT GATATGGGGA<br>GTAGG                         |
| 19 | 123 bp | AGATGGATGG ATGATGGATG GATGATGGAT AGATGGATGA TGGATGGATG<br>GATGATGATG GATGAATAGA TGGATGGATG GATGATGGAT GGATGGACGA<br>TGGATGGATA GATGGATGGA TGG    |
| 29 | 116 bp | TGGATGGATG GATGGATGGG TGGATGGATG AGATGATGGA TGGATGATAA<br>GGTGATGGAT GGATGGGTGG ATGGGTGGAT GGATGGATGA GATGATGGAC<br>GGGTGCATGA TGGATG            |
| 75 | 86 bp  | TGGATAGGTG GATGGGTAGA TGGATGAATG AATGAGTAGA TGGATGGATG<br>GATGATGGAT GGATGGATGG ATGGATGGAT GGATGG                                                |
| 44 | 119 bp | TGGATCGATG GATGGATGGG TGGATGGATC AGATGATGGA TGTGATGATA<br>AGATCGATCG GATGGATGGG TGGATGGCCG GATGGATGGA TGAGATGACG<br>GACGGATGGG TGATGGATG         |
| 81 | 111 bp | TGGATGGATG GATGAATGGG TGGATGGATG AGATGATGGA TGGATGATAA<br>GATGATGGAT GGATGGTGGA TGGGCGGATG GATGGATGAG ATGATGGATG<br>GATGATGGAT G                 |
| 49 | 116 bp | ATAGATGGAT GAGTGGATGG ATGGATGGGT GGATGGATGG ACGGGTGGAT<br>GGGTGGATGG GTAGATGGAT GGATGGATGA GTGGATGGAT GGATGGATGG<br>GTGGATGGGT GGATGG            |
| 62 | 115 bp | ATAGATGGAT GAGTGGATGG ATGGGTGGAT GGATAGATGG GTGGATGGGT<br>GGATGGGTGG ATGGATGATG GATGGATGAG TGGATGGATG GATGGATGGG<br>TGGATGGGTG GACGG             |
| 57 | 112 bp | ATAGATGGAT AAGTGGATGG ATGGATGGGT GGATGGATGG ATGGGTGGAT<br>GGGTGGATGG GTGGATGGAT GGATAAGTGG ATGGATGGAC GGATGGGTGG<br>ATGGGTGGAT GG                |
| 47 | 126 bp | TGGATCGATG GGTGGATGCG ACGGGTGGAT CGGATGAGAT GATGGATGGA<br>TGATCAAGAT GATGATGGCA TGGGTGGATC GGGTGGATGG ATGGCATGAG<br>ATGATCGGAT GGATGGATGA TGAATG |
| 77 | 120 bp | TGGATGGATG GATGGATGGA TGGGTGGATG GATGAGATGA TGGATGGATG<br>ATAAGATGAT GGATGGATGG GTGGATAGGC GGATGGATGG TTGAGATGAT<br>GGAGGGATGG ATGATAGATG        |
| 23 | 117 bp | AAAGGGTGGG TGGAAATGGGA TGGAAATGGGG TGGAAATGGAT GGACGGATGG<br>ATGGGGTGGG TAGAATGGAT GGATGGATGG ACGAATGGAT GTGTGGATGG<br>ATGGATGGAT GGATGGT        |

|    |        |                                                                                                                                          |
|----|--------|------------------------------------------------------------------------------------------------------------------------------------------|
| 80 | 109 bp | AGGTGGATGG ATGGTGGATA GATGGATGGA TGGACGGATG GATGGGTGGA<br>TAAATGGATG GATGGATGGA CGAATGGATG TGTGGATGGA TGGATGGATG<br>GATGGATGG            |
| 86 | 119 bp | ATAGATGGAT GAGTGGGTGG ATGGATGGGT GGATGGATGG ATGGGTGGAT<br>GGGTGGATGG GCGGATGGAT GATGGATGGA TGAGTGGATG GATGGATGGA<br>TGGGTGGATG GGTGGATGG |

## BADSECS

Cao, H., Widlund, H. R., Simonsson, T. & Kubista, M. (1998) TGGA repeats impair nucleosome formation.  
*J. Mol. Biol.* 281, 253-260.

|    |        |                                                                                                                                         |
|----|--------|-----------------------------------------------------------------------------------------------------------------------------------------|
| 24 | 93 bp  | TACCACAATG ACTTGGACAC AAGATACCCC CTCATCATCG CACCTAATTG<br>GTATCAATCA GGGGGCCATC ACCCTCCAGA ACTAAAGTTG CTC                               |
| 26 | 81 bp  | ATGACAGACG ACGCTGTCAA ATATGATAGC ACCAGCCGAG CTCCCCGATG<br>TATGCCACG TTATCTTGTC CTGCTGAAGT T                                             |
| 28 | 95 bp  | AGGCTTACTC GGACATACCC CCCACTAGTC TAACTTTAAC ATTCGAATGA<br>CAAAAACCAC TGAACCTACC TAAGTGCTG ACGTTCTTGT CGCGG                              |
| 48 | 117 bp | TCTAGAGTGT ACAACTATCT ACCCTGTAGG CATCAAGTCT ATTTTCGGTAA<br>TCACTGCAGT TGCATCATTT CGATACGTTG CTCTTGCTTC GCTAGCAACG<br>GACGATCGTA CAAGCAC |
| 51 | 91 bp  | AAGATCGCTA ACTATCCTGG ACTTTGCGAC GAAAATCTAG CACTAAAGGC<br>AGGTCAACTC TTGACCACAC CTCGACGACT GCCCGCAATT A                                 |
| 78 | 97 bp  | ACGAATTACA ATAATACGCC ACATAAGAGG TATGACCCGC CCATCACTTA<br>TCAAGTACAG CACTTGCTG CTATTGACTC TGTTTCTTGA GCAATCC                            |
| 31 | 88 bp  | ACTACTTCGG TATCACAAC TCGTGAATCG CTACAAGTTA CCGGACATAA<br>TCGTTGGTCA CTGGCAGTCC CCATATCTAC CCAAGCGT                                      |
| 32 | 86 bp  | ACCAAGATCC TGTATCAGT CGTAAAGATT AACCAACTGA CCAATAGGAA<br>CACAGTCAGT GGGGGAATCG ATTGAGTACG GGCCTC                                        |
| 33 | 85 bp  | TTGCGCAAGT CGGCGTACTC GTCGACCATT CAAGCTGTTA CCCTAGACTC<br>TCATACCCTC TTACTACTACC AATACCATAT GCGGA                                       |
| 52 | 99 bp  | ACGGTAAGGC GCACACCCGG CTTCTATCCC TCAGCACCGT CTATACCTTG<br>CCGATATTCA CGGCAACTAC ACATCAACCA CTACGCGCTC TCCTCAGGC                         |
| 63 | 89 bp  | CCGGCTAGCG TTTGTCCCAC TTTTCACTAC TATGCAGACC CTGATGTACC<br>CGACTCGAGT ATCGTACCCT CACCGGCCGT CTGGAGTTG                                    |
| 69 | 99 bp  | TACTTCGACT ACACACGCCA ATTCCGCCAA CCTCGTATCA ATTAACCTCA<br>TGACGTGTAT ACCACCCGAC ACGCAAGGCA TCTCGCAGGC TCACCCTCG                         |
| 73 | 95 bp  | AACGTTTCCC CGAAAGTAGG CCTGATGAGA CGACACCCTA TCTCATGTGG<br>ACGACTCATA CGCCCCTGGC ACCATTTCTT CATGTAGTCA ACAGG                             |
| 76 | 92 bp  | TTAGTCCGAA CCAGCAGACG AGTACCCTAG CTGTCGGAGG TATCTATCAC<br>GTGCCCCAGC TGCCACTCAT AATACTACAC GAGATCCGGC CC                                |
| 84 | 102 bp | AGAGGTGACA TGCGACTGAG GACATCTTAT CAGTAGTCAC AACAGCAGAT<br>GGTGCTGCAA TGCCCAACGA TTACCGTCTG CCGCATAGCA CAAGACCCGA AA                     |
| 85 | 99 bp  | AACACGTCCC ATGTCACCCC TGCCCTGTTGG ACTCTCAAAA TGCTCACTAC<br>GCTGAGTATA TTTTATCACA CATGTGTGGT GGACCCCGA ATGCTAACT                         |

|    |        |                                                                                                                             |
|----|--------|-----------------------------------------------------------------------------------------------------------------------------|
| 27 | 87 bp  | TACAAAATTA CGCAAGGCTA TAATGGCCCG AAGGCACGGA AGACCCGGCA<br>AGCAAACGCTA ACTGGCGCGC CAATCCTATG CTTTNNNT                        |
| 30 | 88 bp  | AACCAAGTGA CAACTAACAC ACACAGGTGA GTTATCAGCG GGCCGGCATC<br>CAGTTTAGGA GTGCCACGCC CATCTATGTT AGATACAA                         |
| 43 | 108 bp | CACCACATAG TTTGGTGAAG CCGGCTTCCA GCAAGCACAG TCGACTAACA<br>AAAACGAAAT ATCTGCCCCG GGAGACGAGC TCCTTGATT ACCGCTCTTG<br>CCAACATG |
| 53 | 87 bp  | ATCACACAGG AAACAGCTAT GACATGGCAC ACAGAAAACA GCTATGACTG<br>GGAAAACCTT GCCGTCGTGA CCGGGAAAAC CCTGGCG                          |
| 55 | 89 bp  | TTATACCCAA AAAACCAGGT GAACAGAACG GCCATGCAAT AGTTCCTGCA<br>ACAAACCTGC CTGAAATACG TACACGGAAT CTAAAGTAC                        |
| 56 | 77 bp  | TTCACACAGG AAACAGCTAT GACTGAGAAA ACCCTGGCGT CACACAGGAA<br>ACAGCTATGA CTGGGAAAAC CCTGGCG                                     |
| 59 | 96 bp  | TAGATTCAAG TGACGGACGC GTCTGCCGAC GCCCACTAGA CTGTGCGAAT<br>GGTAAAAATG TTACTGAATA TCCTGGAAAG AGCACCTAGC TGCAAG                |
| 66 | 101 bp | TGTGACGGTT ATGCAACTAG CACGTGATTT TCGTAAGAGG TCACAAGATA<br>ATACGGCGAG ATAACTTAAA CCATCGGACC CGATGACTAA CGGATACACT A          |
| 67 | 84 bp  | CCAGTAGGGT TTGTTCATAC TGAGTAAAAG TCTGTCCATA ACTACCTACA<br>TGGAACGCAA TCAGTCACAG AAATTAGCGC CCGA                             |
| 74 | 87 bp  | AAGAAAACGA TAGAGATCAA ACAGCAAACC TAGATAGTAA TACGACGGAC<br>TCAAACCTCCG GTCGGGCGAG CTGAGGTTGC ACCTAGA                         |

† Names are denoted pasHC# as the plasmid counterparts.

**(iii) Synthetic SELEX sequences\***

Lowary, P.T. & Widom, J., New DNA sequence rules for high affinity binding to histone octamer and sequence-directed nucleosome positioning. (1998) *J. Mol. Biol.* 276, 19-42.

|       |        |                                                                                                                                                                                                                                                                               |
|-------|--------|-------------------------------------------------------------------------------------------------------------------------------------------------------------------------------------------------------------------------------------------------------------------------------|
| 10nvp | 233 bp | GCGAGCTCTA GATACGCTTA AAGTACTTAT CGGCGGCGTA CAAGCGTTTT<br>AGGCTCCAAT TGCCTAGACC GCGGTGCCGG TAAGCTAGCG GGTCGAATGA<br>TTGTACTTCC CCCCTTCTGT CTTAAGCCCC CAGCTCATCC CTCTGTATTA<br>TTCACCCAAG GTCTCGCGCA ATTCCCCTGA GATTGGGTAC TAATGAATCC<br>GACCCGTGCG TGGAAGCCGA GAGGCGATTG CGT  |
| 11nvp | 229 bp | ATGCACTAGA GGGTGACGAG CGCGATGCTG GGCCGACACG CTGGATGTAC<br>TGTTTTTCATT AGTTGTAAAG GTGCCCGCTG GAGGCAGCAT CACAAGTTAT<br>AATTCGTCCA CTTTAAAGAAT GTCGCCTTCG GACTACCAGG GCGGAACCCG<br>ACCAAGGGAC CGCTTATCTC GCGTTTAAACG GCGTTTGCAC GCATCTAGAG<br>TACGCTACGA CATA CGCCGA ACGTAAGCC   |
| 13nvp | 233 bp | TACATAGATT GTTGTACATC TCTAGACCCG CTTAGCGTGC GCTACTGTGC<br>ATTCTGAGCG GTTCACAACA CGGGTGCCCTG GGTTCCGGCC CTCAACTGCG<br>AGCGAGCCCC TGGTGATCCC TTGTTTGGCC CTGCTCGTAC TGCTTCGGCT<br>CCATCCAAGG GGTTGAGAAC GTGGCATGCG CGAAAACGAG CCATATTTAT<br>TTCAAAGCGA TCCTCATTCG CGTTCCTGAC TAT |
| 16nvp | 233 bp | GATGCGTATT GCATACAAGG CAAGATAAAC GTCGCAGAGC TACCATATCG<br>TGCACAGGCT GCGCAAAGTC GGGTGCCCGC GACGACGTGT CTGGTTTCTC<br>AGCTATACTG GGACTAGCCC GAGAGTACTA GAAAACCCGT TTGGAGCCTC<br>ACGACCAAGG ACAAGAGGTA AGTGCGTAGA TTGCTGTCTA AGCCAGTTTA<br>AGCGTACTTA GAAGGCCCTA ACCGACGGCG GAG  |
| 18nvp | 232 bp | TTACAATTTA CAGTGACTTG GACACTTACT GCTACAGAAC CACAGGCAGC<br>ATGCTTAGCC TGGCGATTGC TTGGTGCCAA TACAACGCAC CAGGCGCTGT<br>AATCGACGTA ACTCAACGAG CCTGCCACGC TAAGCATACT TAGAACGTGC<br>CTAACCAAGG GGTGGAGCCT ATCGGGCTGT GTGATTAATAA AATGAACTCT<br>CTCGCTCTGG AGTCTTCCCG TACCCTTCGC TC  |
| 22nvp | 231 bp | CAAGGGGGCG GGATGGGCTC TACAGCGAAC TATCACCCAT TCCGCGAGCG<br>GCACAGTTCC ATCCACTGCT GGGTGCCGGA GTGTTGCGCT TCATACGGTA<br>ATTGCCGGGG TACTACCTGC CGAATGTGGC TTAAATGACA TGACGCCGT<br>GTTCCAAGGG TCTAGAGCAT CGTAGCGCCT TCCCCTGAG GAAAGTAGAC<br>TCGAACACGG TGCATCCCTA ACCACGGCTA A      |
| 24nvp | 228 bp | GACTTCGGAA CGTAAAATTT CTGCCCTGG CTTCTGCGGA CCGTCATCCC<br>CCGTATGGAG AGCCCCGCA CATGGTGCCA ATAGACATGT CTTTCTACAA<br>ATTCAAAACG GGACTACAGT TGAGCTAGGC TGACGGGGAT CTATGAAGCC<br>CCAAGGAGTG CAGGGGTGTA CAGCTCACCG CGTACGTCAC TTAAAGCGGG<br>TCTAGGCGTC ACTAAGGGGC CGGTTGTA          |
| 25nvp | 232 bp | GATCTATAGA GCTCTAGAAT ATTTATGGAG CTGAAAACCTG CTCCCCACA<br>CCCTATACTG CCCGCGTAAG AAGGTGCCGA CTATGTCTGC GGAAATTAAG<br>AGGTATTAATA CGTGCAGCTG GAATGCTCTA GACCCCTTTA GGAGCCGCTA<br>GAGGCCAAGG TTAGCATATT AGCTCGGTAG TTtGGCCTCA GTCAATTGGG<br>TTCACTCCGA ACTGGACATA CCGATTGGA AC   |

|                    |        |                                                                                                                                                                                                                                                                              |
|--------------------|--------|------------------------------------------------------------------------------------------------------------------------------------------------------------------------------------------------------------------------------------------------------------------------------|
| 26nvp              | 229 bp | TGGGCAAAC T ATCAGTCACA AATCACTTGC TTCGCCCAGA GCACGCCCCG<br>CTTTCATTAA ACTGCCCGGT GGTGCCTCTA GTGTACGCCA GACGGACGTA<br>GAGCCTATTC TGGAGCGTTT CCACATAATC CACGAGACAG AAGATACTCA<br>TACCAAGGGA AATCTAGTGC AAACGCAAGT GACGTAACAG TATAACCGCG<br>CGGTGGCTAA CGACACCAA ACTCCGATG      |
| 28nvp              | 226 bp | GAAGAGAATC CCTTCTCTC CCAACTAAAT GCTTAGTTGG CGTCGGTGCT<br>ACCCCTCAG GAAGGGTCTT AGGTGCCTCT AGACCCCTGC AGACGGCCGC<br>TTTCACTGAG TTACTACTGGA TTGACGTTGT CCCACCCGGC GTTACTATCC<br>AAGGGTCTGC CATTACGCAT TGTAGGATGT TTCAAGCTTT GACTGGGTAT<br>TAGGAGGAAT CTCACGGTCA AACTAA          |
| 29nvp              | 231 bp | TGGGAGGGAC CAGTCCGCGA TGGAAATTAT TAACATGAGC ACCACAATTT<br>TCCGTCCAAC ACAGGCACTC CTGGTGCCTG AATGAGGGGC TTAAGTACC<br>CTAGTTAGCT GTGTAGCGAA CTCTAGTGTG TCCTAGAGTG CCTCTCGTGC<br>GATTCCAAGG GGTTTTGGCC TGGGGGATAG GCCACATAGC GGTACTATAG<br>GAGTCTGAGC GGGCGAGTTT GCCTCTAAGA C    |
| 2nvp               | 232 bp | GAGTCAGCCA GCTAGAACGC TCTAGACACT GTTAGCGTGA CGTAGGCCAT<br>TAGATAAGCC CCTACGGAAC GCGGTGCCGG CGTTGTAACG AGGTTGTGTT<br>TTACACGGGA ACATTATGTC GCGTAGCGGC AATGGCGTAA CCCACCTTAC<br>TGTTCCAAGG TCTCACCTCC GAGTGAATCA TCCTCCAGGG TGTGCTCCTC<br>CGGGGTACCC CGCGATGTCC GTGGGTCCGGC GA |
| 30nvp              | 229 bp | TGTGCGTTGT GTAGTCACGG CGTTTGTGTC TCGATGAAAT CGGAAACCCA<br>GAACTTAAGC TGTGCTCCAC ACGGTGCCCC AAAAACGTTA GTAGGCCGGT<br>CTACAGCGTG CTAAAGCACT CTAGAGCCGA TCGTGACCCT GCTATGCTCT<br>GCCAAGGGCA CCTGGTGTAC CCCTTGCACG CAGGTCTGCC TCCGTGTATA<br>CAGGACATTA CCGTGCGCTG TACTATGAT      |
| 34nvp              | 231 bp | rTCgACGGgw gGGCCGCTg cATGcCGTTA CCTcATCTTg CtCCGCTCTA<br>ACCAC TTCAT TATCGAGCAC AGGTGCCCAG ACGATTTAAT TTcCGTgGGA<br>CGGCATcCTG CGGAaGACG TATTTGTCG TAGCAATGGC TGTTAAAGGT<br>TCTCCAAGGA GCCTTCTAGA CCGGCTTAGA GTCATCAGAA TcCAATTCTA<br>AGcGCACCGc raATACTACT GAGGCTAggg G     |
| 37nvp <sup>#</sup> | 229 bp | ACGAATGCAC gGGgcCCGGT CTAATGGAGG CGTAATGGAA GGCAGCTAgG<br>AGAGaAATGC TGCATTCAGT GTCCTTGGca tTtAAGCtA TACTAGACGg<br>CCCCGGCGGg GACTGGAACA CTCGGATAGG CATCAGGAgT AAGCATTGCA<br>ATAGGCACCC AGATTATTGc CCAGATTGTG CTaACACccg gagGaGttAc<br>GacAGTgcaA AGcacATCgG ATCTAGcCA       |
| 38nvp              | 230 bp | cCgGGAAGCs gcgCCAgGat TTCCTccctT ATtgGCTCTA gGTATGcTta<br>AAcgGCTtgG cgcGTTGtTT GCGGTGCCCC TGTGCATGCT AGAGCctTTG<br>GTTGAATGTG CATCAgCCTA GTATTGCAGG AGCgcccCGa GCCAACTGTA<br>CAcCCAAGGT ATTCGTGTGA ACTTCgGcAC tTTTGTgGcTG TcTtGAGttc<br>gCGTTAgCgg tTTTTAGGgg tAAAtgACCA    |
| 40nvp <sup>#</sup> | 231 bp | GcGGAaGGT GGtggGGGTT GTTCAGGcTt CTAGTAGTGC TTAAAGTGCG<br>TTAGAGGCC AgcGCAGcgc tCCCTTGGCA CgGGtcccC cACTGAATAG<br>TaCCTATccT ATTTTcGccG TtttacCGAG GGgtTTaGGA GGcCATACAA<br>AAtGGCACCG TTAAGAtcG ccaggAGGcA CGcCGTgGat cGaGatCTgg<br>CtgcgAcAta aTgcCATgAt TCctgAcCaT t       |

|                             |        |                                                                                                                                                                                                                                                                              |
|-----------------------------|--------|------------------------------------------------------------------------------------------------------------------------------------------------------------------------------------------------------------------------------------------------------------------------------|
| 41nvp <sup>#</sup>          | 230 bp | AGCTGGAAAG TGTAATAGGG CGGGCGCGGG GCGGACACTA TTCgAAggCT<br>gTGTGcATCA TAGTCTGGCA CCTTGGCAGA ATGAGGAGAT ATTGCgCCCT<br>GTACCGGAAA ACgGCTCAGA AcGACGTAAC AGamgcccTA AGcgCACCTA<br>gGGGCACCTA tCTCGTTCGA ACGGGTGTcC ACGCgGTTTC TGcgAATCCT<br>gAACcGGGGA TAGCAGTAGG TgACgGCACT     |
| 52nvp                       | 232 bp | GGACCCGtTA TtgGAATTGA GTCGTATGTC CGACgGCGCG TTGAAGTGGC<br>CGAtTTTTCA ACTACACgGC ATGGTGCCCA CCTCCATAGT CGTGATCTGA<br>ATTcCGCGGC TACATGCGcT GTGTCTTCTA GACCCTCTAG GAGCACGTTA<br>GAgGCCAAGG CAAGCACGGt cCCGGTAACG AACgGGGTTG CACtGGTACG<br>CacCCCTAGA TgGGcAGCTT GGAACGcCTA CT  |
| 54nvp                       | 230 bp | AGAACCTTCT ACATACGCTT AGGGTGAcGc ACTCCTcAtT TCTGAGcCTC<br>GtGcTtTAgg gCGTATAAgG AAGGTGCCAG TCTCGTAGTG TTATAAGCGc<br>GCCCCACGTT GTCAAACGGG CGGCGATCTC TCTTGGCCGT GGTGTTTTATT<br>TGCCCAAGGT TGCGTGCGTA CCaTGAAGTC TTTTTATTGA CTCACCCAAC<br>GAACACACTA GTGCGTACCT cCCGCTTACg    |
| 5nvp                        | 231 bp | GGCTAACTAG GCATCATTAG GTTGTGTGTT TTAGGCCTCT CCCAGCGTCT<br>AACAGTGCTT AGCCACACCG CTGGTGCCAG TGCAGCACTT TACGATACAA<br>TGCGGATGCT TATGGCGAAT TCCCTACTGG AGATCCCTCA CTACTTGCAG<br>TTGCCCAAGG CGTACTGAGG GTATCGACAG CACCACGTAA AATTTTCCAG<br>TGGGGACTCA GGAGTCTTTG CGAAAGACTA G   |
| 602nvp_rev_rev <sup>#</sup> | 232 bp | GGCAAGGTCG CTGTTCAATA CATGCACAGG GTGTaTGTAT CCGACaCGtG<br>CCTGGAGACT AgGAAGTAAT cCCCTTGGCG GTTaAAAATGC gGGGGACAGC<br>gCGTACGTgc GTTTAAGCGG TGCTAGAGCT gtCTAcGACC AATTGAGCGG<br>CCTCGGCACC gGGATTCTcC AGGACGGcCG CGTATAGGGT cCATCACATA<br>agGGATGAAC TCGGTGTGAA GAATCATGCT TT |
| 603nvp                      | 234 bp | CGagacATAC ACGaATatgG CgTTTTCTTA GTACAAaTCA CCCCAGCGTG<br>AcgcGTAAAA TAATCGACAC TCTCGGGTGC CCAGTTCGCG CGCCCaCTA<br>CCGTGTGAAG TCGTCACTCG GGCTTcTAAg TAcgcTTAGg cCACggTAGA<br>gggcaaTCCA AGGCTAACCA CCGTGCATCG ATGTTGaAAG AGGcCCTccG<br>TCctTATTAC TTCaAGTcCC TGGGgTACCG TTtc |
| 604nvp                      | 233 bp | GTCGTCTGCA CAAATACGGA ACCTTTGGty CGgTTTTGCT CTAAGACACG<br>GGCgGCACTc TAACTAGGCT TAAGGTGCCG TAAAGCCGAT TCTGAGTATA<br>AtcCTGTCTC TTGACTTgTc TCGGGCTAAA GTTGACTcGA TGtCGTGACA<br>TCACCCCAAG GCGATCTTGT TTGTAGTcCC CCGTsTATCG TGGGGCCGCG<br>AGACATAGCA kCCAATAGGC ATGATGAATA GTC |
| 605nvp                      | 231 bp | TACTGGTTGG TGTGACAGAT GCTCTAGATG GCGATasmGA CAGGTCAAGG<br>TTCCGACgac GCGGGATATg GGGTGCCTAT cGCACATTGA GTgcgaGACC<br>GGTCTAGATA CGCTTAAACG AcGTTACAAC CCTAGcCCCC TCGTTTTAGC<br>CGcCCAAGGG TATTCAAGcT CGACGCTAAT CACCTATTGA GCCGGTATCC<br>ACCgTcACGA CCATATTAAT AgGACACgCC G   |
| 607nvp_rev_rev              | 227 bp | CTTTGGCGGA GAATGCGTAG GTGAGTGttt tgGAgACGgg aAgGCATaaA<br>ACACCcgGAG CCTAACGaGC GCCTTGGtAt cCGGaacggg tTCTAGTACC<br>cGTTAGCgTG gTTTAGAGGG gCAAAGGAAC ATCTttcccc CCCCAGATA<br>CgGGCACCGt TCgGAcCCTg GTTAGTcCAG TGCTACTGCC GGTTCCTAGC<br>CTAAGGcGAG GATGcCTATT AGaAAGG         |

|                             |        |                                                                                                                                                                                                                                                                              |
|-----------------------------|--------|------------------------------------------------------------------------------------------------------------------------------------------------------------------------------------------------------------------------------------------------------------------------------|
| 609nvp                      | 230 bp | TAATCTTAGC CGGTGTGCAT TACAAGCACT ACAGTGACGG ATGATCTCTA<br>TGCGGATCTT TcAATCATGC GGGTGCCGAG TAgcGTgCcG caGTTGATGG<br>TTCAGCCGAC GAAGCAGGCg GAAcCCACTC CTAACGATGC CCACTACTAT<br>cCTCCAAGGG GCTCTATAcC CCTTAAAgT Gc+tGCGCTGG GCATTGGCTC<br>CgTTTTTCCCC TGTCTTCCAC CGTGCAGTAA    |
| 611nvp <sup>#†</sup>        | 232 bp | GaACGCaAAT CTCAGATgGT gAGTAgGGGG CAGTTGAgGG GCTTGGTCTG<br>TGTTTAAACGC GCTTcTTCAG GGCCTTGGAG CTCTCTCTTG AGCTTGCTGA<br>GCAAtcgTCG ACATTAGCtT TCTGCGTGAg CGGCGTCATT AGTGAGAATG<br>CCAAGGCACC GGCATTGCGC gTGAgATGGG CTAGGCaaCG cgCTAAGcgt<br>ATCTaGAACg CGCTACGAAA CATACGCAtG TT |
| 613nvp                      | 232 bp | TAACTAGCAT GGACCCGATT GTACGCCGTA ACACTCGCGC TCGGTGTACC<br>TTAGTcCTAG TATAGGCGTA TTGGTGCCAA TTGCGCcGAG CgTTGtaGCC<br>GtGGAgTgTc GttGtCGtAT GGGGGCTCTA GATGTGCTTA AACGGGTGGG<br>TsGcCCAAGG CcTGCATTAT TGC GGAGTAT GGCCACGcTT CCGTGCCGCT<br>CCcTAGTcG ACCcTtcACA CTCTCACTCG CG  |
| 615fnvp                     | 229 bp | ACACTTGTAAC AACAGGACGC CGTTATCTTC CCCTCCAGTC GGGACCGGCT<br>CTCCAACCAt GCCAAGCGAG CGGTGCCAGC AAGGATTCGG TCTCTACGTG<br>CATCTAAGAC CCCTTAGAGT GCTCTAcTCG CTCTcGCTAG CTcCGCGAGA<br>ACCAAGGCCG GATTaATTGG CACGGGAGGT TTCTACaaCC GCACTACGTG<br>TGCTGACGTT CGAgCCCCCT CAAACATGt     |
| 618nvp_rev_rev              | 232 bp | CgGACTAAAC GAACCGGtTc GtTTACAtTG TGCgaAgGGG AtTGGCGTTC<br>TACGACAAAt tCtgGGAACA GCCCTTGGTG GCTCTAGGgA GCTCTAGATG<br>AGCTTAGCgG TCTGTAGACg CAATTCTGGG cATTTCCGCT CGTCTGGatC<br>tGTAGGCACC tGCTCGGTCA gGTACaActT TgaAAAAGGCG cCAGTTATGA<br>GCcgGTATCG TgGGCTTTgG GTAgcCCAcc CC |
| 620nvp_rev_rev <sup>‡</sup> | 231 bp | GggACCcAGC GTGCCcAGCG gTCTCTAGaT AcgcttaAAG TACTCTACGC<br>ACTAAAaGAG GcAGCTTGgc CGGGTGCCGC GcAGTGTAaA GTGgATACgc<br>tGGGccTGAC GTATCCGAGG ACgCTCGCgT GTCACTcTTT GCcTTGCCCC<br>CCCCCAAGGA GAAGCCTGAT ACAAacCCAT TCTGCCCGCG AGTCAGTCCG<br>GTCAGaGTGA TACGGCGACC GgtAGATCTT C   |
| 621nvp                      | 232 bp | TACAGGGCGG TTCCCTAGCT GTTGcATAAA GGCCGGTGGT TCGTCGCCCC<br>CCCTTAAAGA TAATCCTGCG TAGGTGCCCG TGGAGCCGTT CTATTGACCC<br>TTTACGATCG TTTAAAGGGG TCTAGAGCTA GCTAGCTTGT TcAGTCTAGC<br>CCCACCAAGG ACTgGTgGCG TATCAGTTCA CGgcCTCCcg GGTgGTCgGG<br>TACtTTagGA ATATCCcgtT TACATCCGAC AT  |
| 624bnvp <sup>#</sup>        | 231 bp | ACTCTAGCAA CTGGTgCGgC GACTcGGgaa CGATTAGGTT GCAATCCTAG<br>ACACCCATCC AGAtTGCAct GTCCTTGGac CCAGAGCCCg CgGAgGgACC<br>GATTTCTAGT TTcCTAGTCT CTGGGTAAcC GAAGcCCCAT ACGGAAACGA<br>GCCAGGCACC GTGCAAAAACG TcCAGAGTGA gCTGTcCTAT CGTTTAAAGCG<br>GTCCTAGAGC CTCTAAGCT TGCAACCACA A  |
| 626nvp                      | 230 bp | xxxxxGGwGG GAATTTcGwG ATwGTTAwGC TCCACCAwGC CTTGTcGCTC<br>TgCtTCGATG AGAGTCGACC GGTGCCgGGT AtTGtATCGC CGCTTGACTC<br>TGGAATgGCG TCTACGTAGC gCTAAGCACT ATTAGAGTCC TCTCCtGCAT<br>CTCCAAGGAT AGtGCCTATA AATCGTCCAC CTGTgGCATT ATcCGGTGCC<br>CTTTCgGgAC gTGCTTTTTA GTGTCgGGTG     |



|                     |        |                                                                                                                                                                                                                                                                                |
|---------------------|--------|--------------------------------------------------------------------------------------------------------------------------------------------------------------------------------------------------------------------------------------------------------------------------------|
| 628fnvp_rev_rev     | 232 bp | TGCGGTTGGG CTAATCGGGG GCTTGGCGCG TAAACCTACC GTTCCGACAC<br>CTGTTCAAAG TTTCTGACCA GTGGTGCCCTG GTCTCTGAAC TGCTGTAGAG<br>AGGCC TAGAC gTGCTTAGCG TG CAGTAGAA CCGATTCTAA ACCGTTTTGA<br>GACGCCAAGG GTTAATGCGC ATAGgcccTT GCATGGCCCC TTGcTCAAGC<br>CGGCTGCCAA CCAGGGccAG AGTCTCCGTT TG |
| 69nvp               | 231 bp | TCgCAtCcac CCTGTgAAGT gGAGGGTCGA CGTTAAatTTA CCATaccCCG<br>cATAACACGT cACGGCTAAC AGGTGCCAAT CTCCTCGGAA AGAATATcAG<br>GatCGcgtTA cCGCACgGGG GGAGCTCTAG AGTGGcTTAA ACGACCGCAG<br>acGCCAAGGG GAACAGGCTG cAGGAGGTgG CCGgGACtCt tcctgCgATC<br>GAACGCTcTc ttGTAGAATT GGATcCTCgG A    |
| 6nvp                | 232 bp | TGGACACTTT TATGTGTTTA CTCGACCTTC CTCAAACctc GCCTTGGGCT<br>GACTCGAATT TTCCAGGCTG CAGGTGCCCGG TGGAGCCTCT AGGTGTGCTC<br>AGAGGACGGT AGAGCCCGAA TCTAGTGCTC TCCCGGTAT TATGTGCCT<br>TCCCCAAGG GACGGCGCAA GTTCCACACG AGCAACGCAG ATCTGGGTCC<br>TGATCACTCG AAAGCCGTCG CTTC CCATAG AC     |
| 73nvp               | 230 bp | GAGAGAGCTG ATAGGCacGC ggacTCACgt GGGTCCCTct TACGGTGGTG<br>GCAGGAGGGC TAGGATGATT GTAGGTGCCT CTAAGTGTGC TTAAAACgaT<br>cCACGGACcG CTcCTGTcGg TTTCTACACG tGTCGGACTT AATCAAAGCT<br>CACTACCAAG GGCgGCgACG TAGccgaTAT CCGCaAAACT ACCATgaGTG<br>GgCAgCctCc GcGcGaCtcc gGGATCTgGA       |
| 7nvp                | 233 bp | GCACCTGCGT CCCAGCCTTC TCCAGATGAG TTTCCACAGT GTCCCTCAGT<br>TTCACGCTTA AAATGCTGCT TTCGGTGCCC CTGCGTGTTT AGGCACTACT<br>AGAGCATTCC ACGGCTTTCT TTTACACTTG ATGGTCTACG CTCTTACGTT<br>CCATGCCAAG GACTGAGGCC TAGCACGATC TAGCcTcTCC CGTGCTGCCG<br>GGAAAATACG CGTCCATCGT TGCTCTTTCC TCT   |
| 83nvp <sup>#§</sup> | 228 bp | ATGCGGATAC AGCAACGGAT GGATCGGgAC AGCCAATCGG TGCCCTCCCGT<br>GGGAGTAAAT CGACAGGCAT ACCCTTGGAG CCCGCGTCTA CCCGGTGCTC<br>TGAAACggcC CCAAATGCC TGTAAgGCAT CCTAAGCATA CTCCTGCGAT<br>aCTAGGCACC TATGGAAGAT TGGAGTGGGT GTCGGACAGT TCATTTAGCG<br>CAacGGGAGA CCCGgcCGct waGCCCTA         |

\* Single and double underlined sequences are restriction fragment sequences used to ligate segments extracted in selection experiments.

# Reverse complement of restriction fragments.

† Restriction fragment sequences overlap with reverse complements.

§ Chain contains second restriction fragment.

‡ Sequence of reverse complement is identical to original sequence.

**(iv) High-resolution positioning sequences<sup>†</sup>***Crystallographic DNA sequence*

Davey, C.A., Sargent, D.F., Luger, K., Mäder, A.W. & Richmond, T.J. (2002) Solvent mediated interactions in the structure of the nucleosome core particle at 1.9 Å resolution. *J. Mol. Biol.* 319, 1087-1113.

pd0285                    146 bp                    ATCAATATCC ACCTGCAGAT TCTACCAAAA GTGTATTTGG AAAGTGCCTC  
ATCAAAAGGC ATGTTTCAGCT GAATTCAGCT GAACATGCCT TTTGATGGAG  
CAGTTTCCAA ATACACTTTT GGTAGAATCT GCAGGTGGAT ATTGAT

pd0286                    146 bp                    ATCTCCAAAT ATCCCTTGCG GATCGTAGAA AAAGTGTGTC AAAGTGCCTC  
ATCAAAAGGA AACTTCAACT GAATTCAGTT GAAGTTTCCC TTTGATAGCG  
CAGTTTGACA CACTTTTCT ACGATCCGCA AGGGATATTT GGAGAT

pd0287                    147 bp                    ATCAATATCC ACCTGCAGAT ACTACCAAAA GTGTATTTGG AAAGTGCCTC  
ATCAAAAGGC ATGTTTCAGCT GGAATCCAGC TGAACATGCC TTTTGTAGGA  
GCAGTTTCCA AATACACTTT TGGTAGTATC TGCAGGTGGA TATTGAT

Bao, Y., White, C.L. & Luger, K. (2006) Nucleosome core particles containing a poly(dA·dT) sequence element exhibit a locally distorted DNA structure. *J. Mol. Biol.* **361**, 617-624.

pd0755                    147 bp                    ATCAATATCC ACCTGCACAT TCTACCAAAA GTGTCAAAA AAAAAAAAAA  
ATCATGATAA GCTAATTTGG CTGACTCAGC TGAACATGCC TTTTGTAGGA  
GCAGTTTCCA AATACACTTT TGGTAGTATC TGCAGGTGGA TATTGAT

*TG-pentamer*

Shrader, T. E. & Crothers, D. M. (1989) Artificial nucleosome positioning sequences. *Proc. Natl. Acad. Sci., USA* 86, 7418-7422.

TG-pentamer            190 bp                    TCGGTGTTAG AGCCTGTAAC TCGGTGTTAG AGCCTGTAAC TCGGTGTTAG  
AGCCTGTAAC TCGGTGTTAG AGCCTGAACT CGGTGTAGAG GCCTGAACTC  
GGTGTAGAG CCTGAACTCG GTGTAGAGC CTGAACTCGG TGTAGAGCC  
TGAACCTCGG GTTAGAGCCT GAACTCGGTG TTAGAGCCTG

*pGUB*

An, W., Leuba, S.H., van Holde, K. & Zlatanova, J. (1998) Linker histone protects linker DNA on only one side of the core particle and in a sequence-dependent manner. *Proc. Natl. Acad. Sci., USA* **95**, 3396-3401.

Kassabov, S.R., N.M. Henry, M. Zofall, T. Tsukiyama & Bartholomew, B. (2002) High-resolution mapping of changes in histone-DNA contacts of nucleosomes remodeled by ISW2. *Mol. Cell. Biol.* **22**, 7524-7534.

pGUB                    183 bp                    GATCCTCTAG ACGGAGGACA GTCCTCCGGT TACCTTCGAA CCACGTGGCC  
GTCTAGATGC TGAATCATTG TCGACACGCG TAGATCTGCT AGCATCGATC  
CATGGACTAG TCTCGAGTTT AAAGATATCC AGCTGCCCGG GAGGCCTTCG  
CGAAATATTG GTACCCCATG GAATCGAGGG ATC

**Table S3. Properties of DNA base-pair steps used in knowledge-based potentials****(i) Number of base-pair steps included in derived ‘energy’ functions<sup>†</sup>**

| Step    | Olson <i>et al.</i> <sup>*</sup> | A+B+AB | B+AB | B    | B+AB+TA | B+TA |
|---------|----------------------------------|--------|------|------|---------|------|
| CG      | 88                               | 160    | 160  | 118  | 160     | 118  |
| CA      | 110                              | 177    | 166  | 143  | 166     | 143  |
| TA      | 134                              | 236    | 232  | 212  | 238     | 218  |
| AG      | 106                              | 168    | 157  | 133  | 157     | 133  |
| GG      | 97                               | 146    | 139  | 95   | 139     | 95   |
| AA      | 129                              | 169    | 169  | 166  | 181     | 178  |
| GA      | 117                              | 175    | 173  | 146  | 173     | 146  |
| AT      | 140                              | 236    | 230  | 202  | 234     | 202  |
| AC      | 137                              | 189    | 188  | 168  | 188     | 168  |
| GC      | 86                               | 182    | 164  | 140  | 164     | 140  |
| Generic | 1840                             | 2862   | 2770 | 2374 | 2798    | 2402 |

<sup>†</sup>Counts exclude terminal dimer units and steps with single-stranded nicks and mismatches within the selected sets of high-resolution structures.

**(ii) Average values and dispersion of Tilt,  $\langle \theta_1 \rangle \pm (\sigma_{\theta_1})$ , in protein-bound DNA dimers**

| Step    | Olson <i>et al.</i> <sup>*</sup> | A+B+AB                | B+AB                  | B                     | B+AB+TA               | B+TA                  |
|---------|----------------------------------|-----------------------|-----------------------|-----------------------|-----------------------|-----------------------|
| CG      | 0.0 <sub>(4.2)</sub>             | 0.0 <sub>(3.9)</sub>  | 0.0 <sub>(3.9)</sub>  | 0.0 <sub>(3.2)</sub>  | 0.0 <sub>(3.9)</sub>  | 0.0 <sub>(3.2)</sub>  |
| CA      | 0.5 <sub>(3.7)</sub>             | 0.1 <sub>(3.1)</sub>  | 0.2 <sub>(3.2)</sub>  | -0.3 <sub>(3.2)</sub> | 0.2 <sub>(3.2)</sub>  | -0.3 <sub>(3.2)</sub> |
| TA      | 0.0 <sub>(2.7)</sub>             | 0.0 <sub>(2.7)</sub>  | 0.0 <sub>(2.7)</sub>  | 0.0 <sub>(2.8)</sub>  | 0.0 <sub>(2.7)</sub>  | 0.0 <sub>(2.8)</sub>  |
| AG      | -1.7 <sub>(3.3)</sub>            | -1.1 <sub>(2.5)</sub> | -1.0 <sub>(2.5)</sub> | -1.0 <sub>(2.5)</sub> | -1.0 <sub>(2.5)</sub> | -1.0 <sub>(2.5)</sub> |
| GG      | -0.1 <sub>(3.7)</sub>            | 0.7 <sub>(3.6)</sub>  | 0.6 <sub>(3.5)</sub>  | 0.4 <sub>(3.6)</sub>  | 0.6 <sub>(3.5)</sub>  | 0.4 <sub>(3.6)</sub>  |
| AA      | -1.4 <sub>(3.3)</sub>            | -1.1 <sub>(2.5)</sub> | -1.1 <sub>(2.5)</sub> | -1.1 <sub>(2.5)</sub> | -0.9 <sub>(2.6)</sub> | -0.9 <sub>(2.6)</sub> |
| GA      | -1.5 <sub>(3.8)</sub>            | -1.5 <sub>(2.8)</sub> | -1.6 <sub>(2.8)</sub> | -1.4 <sub>(2.8)</sub> | -1.6 <sub>(2.8)</sub> | -1.4 <sub>(2.8)</sub> |
| AT      | 0.0 <sub>(2.5)</sub>             | 0.0 <sub>(2.4)</sub>  | 0.0 <sub>(2.5)</sub>  | 0.0 <sub>(2.3)</sub>  | 0.0 <sub>(2.4)</sub>  | 0.0 <sub>(2.3)</sub>  |
| AC      | -0.1 <sub>(3.1)</sub>            | 0.6 <sub>(2.9)</sub>  | 0.6 <sub>(2.9)</sub>  | 0.7 <sub>(2.9)</sub>  | 0.6 <sub>(2.9)</sub>  | 0.7 <sub>(2.9)</sub>  |
| GC      | 0.0 <sub>(3.9)</sub>             | 0.0 <sub>(3.6)</sub>  | 0.0 <sub>(3.8)</sub>  | 0.0 <sub>(3.9)</sub>  | 0.0 <sub>(3.8)</sub>  | 0.0 <sub>(3.9)</sub>  |
| Generic | 0.0 <sub>(3.6)</sub>             | 0.0 <sub>(3.1)</sub>  |

**(iii) Average values and dispersion of Roll,  $\langle \theta_2 \rangle \pm (\sigma_{\theta_2})$ , in protein-bound DNA dimers**

| Step    | Olson <i>et al.</i> * | A+B+AB               | B+AB                 | B                    | B+AB+TA              | B+TA                 |
|---------|-----------------------|----------------------|----------------------|----------------------|----------------------|----------------------|
| CG      | 5.4 <sub>(5.2)</sub>  | 5.5 <sub>(5.7)</sub> | 5.5 <sub>(5.7)</sub> | 6.0 <sub>(5.8)</sub> | 5.5 <sub>(5.7)</sub> | 6.0 <sub>(5.8)</sub> |
| CA      | 4.7 <sub>(5.1)</sub>  | 5.1 <sub>(5.0)</sub> | 5.2 <sub>(4.9)</sub> | 4.9 <sub>(4.9)</sub> | 5.2 <sub>(4.9)</sub> | 4.9 <sub>(4.9)</sub> |
| TA      | 3.3 <sub>(6.6)</sub>  | 2.5 <sub>(5.8)</sub> | 2.4 <sub>(5.8)</sub> | 2.6 <sub>(5.7)</sub> | 2.7 <sub>(6.1)</sub> | 3.0 <sub>(6.0)</sub> |
| AG      | 4.5 <sub>(3.4)</sub>  | 4.1 <sub>(3.7)</sub> | 4.2 <sub>(3.5)</sub> | 4.2 <sub>(3.4)</sub> | 4.2 <sub>(3.5)</sub> | 4.2 <sub>(3.4)</sub> |
| GG      | 3.6 <sub>(4.5)</sub>  | 5.0 <sub>(4.6)</sub> | 4.8 <sub>(4.6)</sub> | 5.0 <sub>(4.7)</sub> | 4.8 <sub>(4.6)</sub> | 5.0 <sub>(4.7)</sub> |
| AA      | 0.7 <sub>(5.4)</sub>  | 0.7 <sub>(4.5)</sub> | 0.7 <sub>(4.5)</sub> | 0.7 <sub>(4.5)</sub> | 1.7 <sub>(5.7)</sub> | 1.7 <sub>(5.7)</sub> |
| GA      | 1.9 <sub>(5.3)</sub>  | 1.9 <sub>(5.4)</sub> | 1.8 <sub>(5.4)</sub> | 2.6 <sub>(3.9)</sub> | 1.8 <sub>(5.4)</sub> | 2.6 <sub>(3.9)</sub> |
| AT      | 1.1 <sub>(4.9)</sub>  | 1.0 <sub>(3.7)</sub> | 1.0 <sub>(3.6)</sub> | 0.9 <sub>(3.7)</sub> | 1.0 <sub>(3.6)</sub> | 0.9 <sub>(3.7)</sub> |
| AC      | 0.7 <sub>(3.9)</sub>  | 1.6 <sub>(3.3)</sub> | 1.5 <sub>(3.3)</sub> | 1.5 <sub>(3.4)</sub> | 1.5 <sub>(3.3)</sub> | 1.5 <sub>(3.4)</sub> |
| GC      | 0.3 <sub>(4.6)</sub>  | 1.2 <sub>(4.6)</sub> | 0.4 <sub>(4.0)</sub> | 0.7 <sub>(3.7)</sub> | 0.4 <sub>(4.0)</sub> | 0.7 <sub>(3.7)</sub> |
| Generic | 2.7 <sub>(5.2)</sub>  | 2.9 <sub>(4.9)</sub> | 2.9 <sub>(4.9)</sub> | 3.0 <sub>(4.7)</sub> | 3.0 <sub>(5.0)</sub> | 3.1 <sub>(4.8)</sub> |

**(iv) Average values and dispersion of Twist,  $\langle \theta_3 \rangle \pm (\sigma_{\theta_3})$ , in protein-bound DNA dimers**

| Step    | Olson <i>et al.</i> * | A+B+AB                | B+AB                  | B                     | B+AB+TA               | B+TA                  |
|---------|-----------------------|-----------------------|-----------------------|-----------------------|-----------------------|-----------------------|
| CG      | 36.1 <sub>(5.5)</sub> | 34.4 <sub>(3.7)</sub> | 34.4 <sub>(3.7)</sub> | 33.9 <sub>(3.7)</sub> | 34.4 <sub>(3.7)</sub> | 33.9 <sub>(3.7)</sub> |
| CA      | 37.3 <sub>(6.5)</sub> | 35.0 <sub>(4.9)</sub> | 35.5 <sub>(4.6)</sub> | 35.8 <sub>(4.6)</sub> | 35.5 <sub>(4.6)</sub> | 35.8 <sub>(4.6)</sub> |
| TA      | 37.8 <sub>(5.5)</sub> | 37.4 <sub>(7.3)</sub> | 37.5 <sub>(7.3)</sub> | 37.6 <sub>(7.5)</sub> | 37.1 <sub>(7.7)</sub> | 37.1 <sub>(7.9)</sub> |
| AG      | 31.9 <sub>(4.5)</sub> | 32.5 <sub>(4.6)</sub> | 32.6 <sub>(4.6)</sub> | 32.3 <sub>(4.5)</sub> | 32.6 <sub>(4.6)</sub> | 32.3 <sub>(4.5)</sub> |
| GG      | 32.9 <sub>(5.2)</sub> | 33.3 <sub>(4.5)</sub> | 33.4 <sub>(4.5)</sub> | 32.7 <sub>(3.9)</sub> | 33.4 <sub>(4.5)</sub> | 32.7 <sub>(3.9)</sub> |
| AA      | 35.1 <sub>(3.9)</sub> | 35.1 <sub>(3.9)</sub> | 35.1 <sub>(3.9)</sub> | 35.1 <sub>(3.9)</sub> | 34.3 <sub>(4.8)</sub> | 34.3 <sub>(4.8)</sub> |
| GA      | 36.3 <sub>(4.4)</sub> | 35.5 <sub>(4.2)</sub> | 35.7 <sub>(4.1)</sub> | 35.5 <sub>(4.2)</sub> | 35.7 <sub>(4.1)</sub> | 35.5 <sub>(4.2)</sub> |
| AT      | 29.3 <sub>(4.5)</sub> | 29.8 <sub>(4.0)</sub> | 29.8 <sub>(4.0)</sub> | 29.8 <sub>(4.2)</sub> | 29.5 <sub>(4.4)</sub> | 29.8 <sub>(4.2)</sub> |
| AC      | 31.5 <sub>(4.2)</sub> | 31.7 <sub>(3.7)</sub> | 31.7 <sub>(3.7)</sub> | 31.5 <sub>(3.6)</sub> | 31.7 <sub>(3.7)</sub> | 31.5 <sub>(3.6)</sub> |
| GC      | 33.6 <sub>(4.7)</sub> | 33.7 <sub>(5.0)</sub> | 34.3 <sub>(4.6)</sub> | 33.5 <sub>(4.4)</sub> | 34.3 <sub>(4.6)</sub> | 33.5 <sub>(4.4)</sub> |
| Generic | 34.2 <sub>(5.5)</sub> | 33.8 <sub>(4.9)</sub> | 34.0 <sub>(4.9)</sub> | 33.8 <sub>(4.8)</sub> | 33.8 <sub>(5.0)</sub> | 33.6 <sub>(4.9)</sub> |

**(v) Average values and dispersion of Shift,  $\langle \theta_4 \rangle \pm (\sigma_{\theta_4})$ , in protein-bound DNA dimers**

| Step    | Olson <i>et al.</i> *   | A+B+AB                  | B+AB                    | B                       | B+AB+TA                 | B+TA                    |
|---------|-------------------------|-------------------------|-------------------------|-------------------------|-------------------------|-------------------------|
| CG      | 0.00 <sub>(0.87)</sub>  | 0.00 <sub>(0.79)</sub>  | 0.00 <sub>(0.79)</sub>  | 0.00 <sub>(0.75)</sub>  | 0.00 <sub>(0.79)</sub>  | 0.00 <sub>(0.75)</sub>  |
| CA      | 0.09 <sub>(0.55)</sub>  | -0.05 <sub>(0.67)</sub> | -0.08 <sub>(0.67)</sub> | -0.15 <sub>(0.67)</sub> | -0.08 <sub>(0.67)</sub> | -0.15 <sub>(0.67)</sub> |
| TA      | 0.00 <sub>(0.52)</sub>  | 0.00 <sub>(0.58)</sub>  | 0.00 <sub>(0.58)</sub>  | 0.00 <sub>(0.55)</sub>  | 0.00 <sub>(0.58)</sub>  | 0.00 <sub>(0.54)</sub>  |
| AG      | 0.09 <sub>(0.69)</sub>  | 0.19 <sub>(0.64)</sub>  | 0.20 <sub>(0.65)</sub>  | 0.20 <sub>(0.65)</sub>  | 0.20 <sub>(0.65)</sub>  | 0.20 <sub>(0.65)</sub>  |
| GG      | 0.05 <sub>(0.76)</sub>  | 0.02 <sub>(0.67)</sub>  | 0.01 <sub>(0.68)</sub>  | 0.02 <sub>(0.73)</sub>  | 0.01 <sub>(0.68)</sub>  | 0.02 <sub>(0.73)</sub>  |
| AA      | -0.03 <sub>(0.57)</sub> | 0.08 <sub>(0.35)</sub>  | 0.08 <sub>(0.35)</sub>  | 0.08 <sub>(0.35)</sub>  | 0.10 <sub>(0.35)</sub>  | 0.10 <sub>(0.35)</sub>  |
| GA      | -0.28 <sub>(0.46)</sub> | -0.21 <sub>(0.49)</sub> | -0.22 <sub>(0.49)</sub> | -0.21 <sub>(0.50)</sub> | -0.22 <sub>(0.49)</sub> | -0.21 <sub>(0.50)</sub> |
| AT      | 0.00 <sub>(0.57)</sub>  | 0.00 <sub>(0.54)</sub>  | 0.00 <sub>(0.54)</sub>  | 0.00 <sub>(0.55)</sub>  | 0.00 <sub>(0.55)</sub>  | 0.00 <sub>(0.55)</sub>  |
| AC      | 0.13 <sub>(0.59)</sub>  | 0.22 <sub>(0.55)</sub>  | 0.22 <sub>(0.55)</sub>  | 0.21 <sub>(0.57)</sub>  | 0.22 <sub>(0.55)</sub>  | 0.21 <sub>(0.57)</sub>  |
| GC      | 0.00 <sub>(0.61)</sub>  | 0.00 <sub>(0.70)</sub>  | 0.00 <sub>(0.72)</sub>  | 0.00 <sub>(0.74)</sub>  | 0.00 <sub>(0.72)</sub>  | 0.00 <sub>(0.74)</sub>  |
| Generic | 0.00 <sub>(0.64)</sub>  | 0.00 <sub>(0.61)</sub>  | 0.00 <sub>(0.61)</sub>  | 0.00 <sub>(0.62)</sub>  | 0.00 <sub>(0.61)</sub>  | 0.00 <sub>(0.62)</sub>  |

**(vi) Average values and dispersion of Slide,  $\langle \theta_5 \rangle \pm (\sigma_{\theta_5})$ , in protein-bound DNA dimers**

| Step    | Olson <i>et al.</i> *   | A+B+AB                  | B+AB                    | B                       | B+AB+TA                 | B+TA                    |
|---------|-------------------------|-------------------------|-------------------------|-------------------------|-------------------------|-------------------------|
| CG      | 0.41 <sub>(0.56)</sub>  | 0.36 <sub>(0.57)</sub>  | 0.36 <sub>(0.57)</sub>  | 0.55 <sub>(0.40)</sub>  | 0.36 <sub>(0.57)</sub>  | 0.55 <sub>(0.40)</sub>  |
| CA      | 0.53 <sub>(0.89)</sub>  | 0.22 <sub>(0.91)</sub>  | 0.33 <sub>(0.81)</sub>  | 0.50 <sub>(0.75)</sub>  | 0.33 <sub>(0.81)</sub>  | 0.50 <sub>(0.75)</sub>  |
| TA      | 0.05 <sub>(0.71)</sub>  | 0.37 <sub>(0.93)</sub>  | 0.39 <sub>(0.92)</sub>  | 0.46 <sub>(0.93)</sub>  | 0.43 <sub>(0.95)</sub>  | 0.50 <sub>(0.95)</sub>  |
| AG      | -0.25 <sub>(0.41)</sub> | -0.32 <sub>(0.45)</sub> | -0.27 <sub>(0.41)</sub> | -0.22 <sub>(0.40)</sub> | -0.27 <sub>(0.41)</sub> | -0.22 <sub>(0.40)</sub> |
| GG      | -0.22 <sub>(0.64)</sub> | -0.52 <sub>(0.62)</sub> | -0.45 <sub>(0.54)</sub> | -0.27 <sub>(0.50)</sub> | -0.45 <sub>(0.54)</sub> | -0.27 <sub>(0.50)</sub> |
| AA      | -0.08 <sub>(0.45)</sub> | -0.16 <sub>(0.33)</sub> | -0.16 <sub>(0.33)</sub> | -0.15 <sub>(0.33)</sub> | -0.11 <sub>(0.38)</sub> | -0.11 <sub>(0.38)</sub> |
| GA      | 0.09 <sub>(0.70)</sub>  | -0.12 <sub>(0.53)</sub> | -0.10 <sub>(0.51)</sub> | -0.02 <sub>(0.48)</sub> | -0.10 <sub>(0.51)</sub> | -0.02 <sub>(0.48)</sub> |
| AT      | -0.59 <sub>(0.31)</sub> | -0.66 <sub>(0.33)</sub> | -0.64 <sub>(0.32)</sub> | -0.58 <sub>(0.28)</sub> | -0.64 <sub>(0.32)</sub> | -0.58 <sub>(0.28)</sub> |
| AC      | -0.58 <sub>(0.41)</sub> | -0.63 <sub>(0.32)</sub> | -0.62 <sub>(0.32)</sub> | -0.58 <sub>(0.37)</sub> | -0.62 <sub>(0.32)</sub> | -0.58 <sub>(0.37)</sub> |
| GC      | -0.38 <sub>(0.56)</sub> | -0.33 <sub>(0.55)</sub> | -0.21 <sub>(0.41)</sub> | -0.15 <sub>(0.39)</sub> | -0.21 <sub>(0.41)</sub> | -0.15 <sub>(0.39)</sub> |
| Generic | -0.09 <sub>(0.69)</sub> | -0.21 <sub>(0.67)</sub> | -0.17 <sub>(0.64)</sub> | -0.07 <sub>(0.63)</sub> | -0.16 <sub>(0.65)</sub> | -0.07 <sub>(0.64)</sub> |

**(vii) Average values and dispersion of Rise,  $\langle \theta_6 \rangle \pm (\sigma_{\theta_6})$ , in protein-bound DNA dimers**

| Step    | Olson <i>et al.</i> *  | A+B+AB                 | B+AB                   | B                      | B+AB+TA                | B+TA                   |
|---------|------------------------|------------------------|------------------------|------------------------|------------------------|------------------------|
| CG      | 3.39 <sub>(0.27)</sub> | 3.41 <sub>(0.22)</sub> | 3.41 <sub>(0.22)</sub> | 3.38 <sub>(0.23)</sub> | 3.41 <sub>(0.22)</sub> | 3.38 <sub>(0.23)</sub> |
| CA      | 3.33 <sub>(0.26)</sub> | 3.38 <sub>(0.26)</sub> | 3.37 <sub>(0.23)</sub> | 3.35 <sub>(0.22)</sub> | 3.37 <sub>(0.23)</sub> | 3.35 <sub>(0.22)</sub> |
| TA      | 3.42 <sub>(0.24)</sub> | 3.32 <sub>(0.21)</sub> | 3.33 <sub>(0.21)</sub> | 3.30 <sub>(0.19)</sub> | 3.33 <sub>(0.21)</sub> | 3.31 <sub>(0.19)</sub> |
| AG      | 3.34 <sub>(0.23)</sub> | 3.35 <sub>(0.23)</sub> |
| GG      | 3.42 <sub>(0.24)</sub> | 3.45 <sub>(0.24)</sub> | 3.45 <sub>(0.24)</sub> | 3.38 <sub>(0.20)</sub> | 3.45 <sub>(0.24)</sub> | 3.38 <sub>(0.20)</sub> |
| AA      | 3.27 <sub>(0.22)</sub> | 3.25 <sub>(0.17)</sub> | 3.25 <sub>(0.17)</sub> | 3.25 <sub>(0.16)</sub> | 3.26 <sub>(0.17)</sub> | 3.25 <sub>(0.16)</sub> |
| GA      | 3.37 <sub>(0.26)</sub> | 3.32 <sub>(0.20)</sub> | 3.32 <sub>(0.21)</sub> | 3.27 <sub>(0.17)</sub> | 3.32 <sub>(0.21)</sub> | 3.27 <sub>(0.17)</sub> |
| AT      | 3.31 <sub>(0.21)</sub> | 3.24 <sub>(0.17)</sub> | 3.24 <sub>(0.17)</sub> | 3.24 <sub>(0.17)</sub> | 3.24 <sub>(0.16)</sub> | 3.24 <sub>(0.17)</sub> |
| AC      | 3.36 <sub>(0.23)</sub> | 3.27 <sub>(0.20)</sub> | 3.27 <sub>(0.20)</sub> | 3.27 <sub>(0.21)</sub> | 3.27 <sub>(0.20)</sub> | 3.27 <sub>(0.21)</sub> |
| GC      | 3.40 <sub>(0.24)</sub> | 3.36 <sub>(0.24)</sub> | 3.33 <sub>(0.24)</sub> | 3.29 <sub>(0.22)</sub> | 3.33 <sub>(0.24)</sub> | 3.29 <sub>(0.22)</sub> |
| Generic | 3.36 <sub>(0.25)</sub> | 3.34 <sub>(0.23)</sub> | 3.33 <sub>(0.22)</sub> | 3.31 <sub>(0.21)</sub> | 3.33 <sub>(0.22)</sub> | 3.31 <sub>(0.21)</sub> |

**(viii) Relative base-pair flexibility  $V$  of protein-bound DNA dimers<sup>†</sup>**

| Step    | Olson <i>et al.</i> * | A+B+AB | B+AB | B   | B+AB+TA | B+TA |
|---------|-----------------------|--------|------|-----|---------|------|
| CG      | 12.1                  | 4.9    | 4.9  | 2.3 | 4.9     | 2.3  |
| CA      | 9.8                   | 7.1    | 5.1  | 4.7 | 5.1     | 4.7  |
| TA      | 6.3                   | 7.6    | 7.5  | 6.1 | 8.4     | 6.8  |
| AG      | 2.1                   | 1.6    | 1.3  | 1.1 | 1.3     | 1.1  |
| GG      | 6.1                   | 4.1    | 3.6  | 2.6 | 3.6     | 2.6  |
| AA      | 2.9                   | 0.6    | 0.6  | 0.6 | 0.8     | 0.8  |
| GA      | 4.5                   | 1.9    | 1.8  | 1.0 | 1.8     | 1.0  |
| AT      | 1.6                   | 0.9    | 0.8  | 0.7 | 0.9     | 0.7  |
| AC      | 2.3                   | 0.9    | 0.9  | 1.1 | 0.9     | 1.1  |
| GC      | 4.0                   | 3.5    | 2.2  | 1.8 | 2.2     | 1.8  |
| Generic | 9.2                   | 5.2    | 4.8  | 4.2 | 5.1     | 4.5  |

<sup>†</sup>Deformability values, in units of ( $\text{\AA}^{-\circ}$ )<sup>3</sup> given by the products of the eigenvalues of the covariance matrix of the averages and products of the six step parameters.

\*W.K. Olson, A.A. Gorin, X.-J. Lu, L.M. Hock & V.B. Zhurkin (1998) DNA sequence-dependent deformability deduced from protein-DNA crystal complexes, *Proc. Natl. Acad. Sci., USA* **95**, 11163-11168.

**Table S4. Comparative ‘cost’ of nucleosomal deformation of individual base-pair steps with knowledge-based functions based on different subsets of observed protein-bound DNA conformations<sup>†</sup>**

**(i) Pyrimidine-purine (YR) base-pair steps**

*CG*

| Score               | Olson <i>et al.</i> <sup>*</sup> | A+B+AB | B+AB | B    | B+AB+TA | B+TA |
|---------------------|----------------------------------|--------|------|------|---------|------|
| $\langle E \rangle$ | 7.4                              | 4.5    | 4.5  | 6.4  | 4.5     | 6.4  |
| $E_0$               | 0.8                              | 0.4    | 0.4  | 0.7  | 0.4     | 0.7  |
| $E^\dagger$         | 24.8                             | 13.0   | 13.0 | 18.8 | 13.0    | 18.8 |
| $SH_0$              | -2.4                             | -2.4   | -2.4 | -2.4 | -2.4    | -2.4 |
| $SH^\dagger$        | -1.7                             | 1.5    | 1.5  | 1.5  | 1.5     | 1.5  |

*CA*

| Score               | Olson <i>et al.</i> <sup>*</sup> | A+B+AB | B+AB | B    | B+AB+TA | B+TA |
|---------------------|----------------------------------|--------|------|------|---------|------|
| $\langle E \rangle$ | 8.6                              | 4.0    | 4.4  | 4.4  | 4.4     | 4.4  |
| $E_0$               | 1.3                              | 0.4    | 0.4  | 0.6  | 0.4     | 0.6  |
| $E^\dagger$         | 30.6                             | 13.8   | 14.9 | 14.6 | 14.9    | 14.6 |
| $SH_0$              | -2.4                             | 0.1    | -1.0 | -1.0 | -1.0    | -1.0 |
| $SH^\dagger$        | -2.0                             | -2.0   | -2.0 | -1.5 | -2.0    | -1.5 |

**Pyrimidine-purine (YR) base-pair steps (continued)**

*TG*

| Score               | Olson <i>et al.</i> * | A+B+AB | B+AB | B    | B+AB+TA | B+TA |
|---------------------|-----------------------|--------|------|------|---------|------|
| $\langle E \rangle$ | 8.2                   | 3.8    | 4.2  | 4.2  | 4.2     | 4.2  |
| $E_0$               | 1.0                   | 0.4    | 0.5  | 0.7  | 0.5     | 0.7  |
| $E^\dagger$         | 29.1                  | 13.1   | 14.5 | 14.3 | 14.5    | 14.3 |
| $SH_0$              | 0.1                   | -2.4   | -2.4 | -1.0 | -2.4    | -1.0 |
| $SH^\dagger$        | -1.7                  | -1.7   | -1.7 | -1.9 | -1.7    | -1.9 |

*TA*

| Score               | Olson <i>et al.</i> * | A+B+AB | B+AB | B    | B+AB+TA | B+TA |
|---------------------|-----------------------|--------|------|------|---------|------|
| $\langle E \rangle$ | 8.7                   | 4.3    | 4.3  | 4.7  | 4.6     | 4.8  |
| $E_0$               | 1.0                   | 0.6    | 0.7  | 0.8  | 0.7     | 0.8  |
| $E^\dagger$         | 26.6                  | 14.8   | 14.8 | 19.1 | 16.9    | 19.4 |
| $SH_0$              | -2.4                  | 0.1    | 0.1  | 0.1  | 0.1     | 0.1  |
| $SH^\dagger$        | -1.9                  | -1.5   | -1.5 | -1.5 | -1.5    | -1.5 |



**(ii) Purine-purine and pyrimidine-pyrimidine (RR, YY) base-pair steps***AG*

| Score               | Olson <i>et al.</i> * | A+B+AB | B+AB | B    | B+AB+TA | B+TA |
|---------------------|-----------------------|--------|------|------|---------|------|
| $\langle E \rangle$ | 18.1                  | 9.4    | 10.7 | 11.1 | 10.7    | 11.1 |
| $E_0$               | 1.0                   | 0.8    | 0.8  | 0.9  | 0.8     | 0.9  |
| $E^\dagger$         | 67.1                  | 33.4   | 41.8 | 44.0 | 41.9    | 44.0 |
| $SH_0$              | 1.0                   | -0.1   | -0.1 | -0.1 | -0.1    | -0.1 |
| $SH^\dagger$        | 1.5                   | 1.5    | 1.5  | 1.5  | 1.5     | 1.5  |

*CT*

| Score               | Olson <i>et al.</i> * | A+B+AB | B+AB | B    | B+AB+TA | B+TA |
|---------------------|-----------------------|--------|------|------|---------|------|
| $\langle E \rangle$ | 19.4                  | 10.2   | 11.5 | 12.0 | 11.5    | 12.0 |
| $E_0$               | 0.6                   | 0.2    | 0.2  | 0.2  | 0.2     | 0.2  |
| $E^\dagger$         | 59.4                  | 31.4   | 39.0 | 40.7 | 39.0    | 40.7 |
| $SH_0$              | 0.1                   | 0.1    | 0.1  | 0.1  | 0.1     | 0.1  |
| $SH^\dagger$        | 1.5                   | 1.5    | 1.5  | 1.5  | 1.5     | 1.5  |

**Purine-purine and pyrimidine-pyrimidine (RR, YY) base-pair steps (continued)**

*GG*

| Score               | Olson <i>et al.</i> * | A+B+AB | B+AB | B    | B+AB+TA | B+TA |
|---------------------|-----------------------|--------|------|------|---------|------|
| $\langle E \rangle$ | 10.3                  | 5.4    | 5.9  | 5.7  | 5.9     | 5.7  |
| $E_0$               | 0.9                   | 0.5    | 0.4  | 0.3  | 0.4     | 0.3  |
| $E^\dagger$         | 44.4                  | 17.9   | 18.5 | 18.9 | 18.4    | 18.9 |
| $SH_0$              | 0.1                   | 0.1    | 0.1  | 0.1  | 0.1     | 0.1  |
| $SH^\dagger$        | -2.0                  | -2.0   | -2.0 | -2.0 | -2.0    | -2.0 |

*CC*

| Score               | Olson <i>et al.</i> * | A+B+AB | B+AB | B    | B+AB+TA | B+TA |
|---------------------|-----------------------|--------|------|------|---------|------|
| $\langle E \rangle$ | 11.4                  | 6.0    | 6.5  | 6.6  | 6.5     | 6.6  |
| $E_0$               | 0.7                   | 0.5    | 0.5  | 0.3  | 0.5     | 0.3  |
| $E^\dagger$         | 39.0                  | 18.2   | 18.9 | 17.8 | 18.9    | 17.8 |
| $SH_0$              | 0.1                   | 0.1    | 0.1  | 0.1  | 0.1     | 0.1  |
| $SH^\dagger$        | -2.0                  | -2.0   | -2.0 | -1.9 | -2.0    | -1.9 |



**Purine-purine and pyrimidine-pyrimidine (RR, YY) base-pair steps (continued)**

*GA*

| Score               | Olson <i>et al.</i> * | A+B+AB | B+AB | B    | B+AB+TA | B+TA |
|---------------------|-----------------------|--------|------|------|---------|------|
| $\langle E \rangle$ | 12.3                  | 7.5    | 7.5  | 8.7  | 7.5     | 8.7  |
| $E_0$               | 1.0                   | 0.7    | 0.7  | 0.9  | 0.7     | 0.9  |
| $E^\dagger$         | 47.3                  | 24.6   | 24.4 | 31.7 | 24.4    | 31.7 |
| $SH_0$              | -0.1                  | -0.1   | -0.1 | -0.1 | -0.1    | -0.1 |
| $SH^\dagger$        | -1.7                  | -1.5   | -1.5 | -1.5 | -1.5    | -1.5 |

*TC*

| Score               | Olson <i>et al.</i> * | A+B+AB | B+AB | B    | B+AB+TA | B+TA |
|---------------------|-----------------------|--------|------|------|---------|------|
| $\langle E \rangle$ | 13.5                  | 8.0    | 8.1  | 9.4  | 8.1     | 9.4  |
| $E_0$               | 2.0                   | 1.1    | 1.2  | 1.3  | 1.2     | 1.3  |
| $E^\dagger$         | 45.7                  | 25.7   | 25.8 | 30.4 | 25.8    | 30.4 |
| $SH_0$              | -0.9                  | 0.1    | 0.1  | -0.9 | 0.1     | -0.9 |
| $SH^\dagger$        | 2.5                   | -1.6   | -1.6 | -1.6 | -1.6    | -1.6 |



## Purine-pyrimidine (RY) base-pair steps (continued)

## GT

| Score               | Olson <i>et al.</i> * | A+B+AB | B+AB | B    | B+AB+TA | B+TA |
|---------------------|-----------------------|--------|------|------|---------|------|
| $\langle E \rangle$ | 20.3                  | 15.6   | 15.6 | 12.5 | 15.6    | 12.5 |
| $E_0$               | 1.1                   | 0.9    | 0.9  | 0.7  | 0.9     | 0.7  |
| $E^\dagger$         | 62.4                  | 44.1   | 44.1 | 38.4 | 44.1    | 38.4 |
| SH <sub>0</sub>     | 1.2                   | 1.2    | 1.2  | 1.2  | 1.2     | 1.2  |
| SH <sup>†</sup>     | -2.0                  | 1.5    | 1.5  | -2.0 | 1.5     | -2.0 |

## GC

| Score               | Olson <i>et al.</i> * | A+B+AB | B+AB | B    | B+AB+TA | B+TA |
|---------------------|-----------------------|--------|------|------|---------|------|
| $\langle E \rangle$ | 15.7                  | 7.1    | 8.8  | 7.1  | 8.8     | 7.1  |
| $E_0$               | 1.9                   | 1.0    | 1.1  | -1.9 | 1.1     | -1.9 |
| $E^\dagger$         | 89.8                  | 39.8   | 47.1 | 32.0 | 47.1    | 32.0 |
| SH <sub>0</sub>     | 1.2                   | 1.2    | 1.2  | -2.3 | 1.2     | -2.3 |
| SH <sup>†</sup>     | -2.0                  | -2.0   | -2.0 | -2.0 | -2.0    | -2.0 |

† Knowledge-based scores — average cost  $\langle E \rangle$  over the central 60 base-pair steps of the best-resolved nucleosome core particle structure (2) and the least and most costly values,  $E_0$  and  $E^\dagger$  — derived from the base-pair step parameters of DNA dimers of different conformational types from high-resolution protein-DNA structures. Locations SH<sub>0</sub> and SH<sup>†</sup> of the least and most costly steps are expressed in terms of superhelical position, *i.e.*, number of helical turns with respect to the structural dyad. See text and legend to Table 1

\*W.K. Olson, A.A. Gorin, X.-J. Lu, L.M. Hock & V.B. Zhurkin (1998) DNA sequence-dependent deformability deduced from protein-DNA crystal complexes, Proc. Natl. Acad. Sci., USA 95, 11163-11168.

**Table S5. Threading scores of known nucleosome binding and antiselection sequences on the central 60 base-pair steps of the 147-bp nucleosome core-particle structure (NDB\_ID pd0287) (2) and an ideal 61-bp superhelical template with the same average global structure.<sup>§</sup>**

| Sequence_ID                                               | <i>Crystallographic template</i> |            |       |             | <i>Smooth superhelical template</i> |            |       |             |
|-----------------------------------------------------------|----------------------------------|------------|-------|-------------|-------------------------------------|------------|-------|-------------|
|                                                           | $\langle U \rangle$              | $\sigma_U$ | $U_0$ | $U^\dagger$ | $\langle U \rangle$                 | $\sigma_U$ | $U_0$ | $U^\dagger$ |
| <b>Nucleosome-binding sequences from the mouse genome</b> |                                  |            |       |             |                                     |            |       |             |
| <i>A-tracts 1</i>                                         |                                  |            |       |             |                                     |            |       |             |
| phcn4                                                     | 501                              | 43         | 415   | 633         | 146                                 | 3          | 140   | 152         |
| phcn8                                                     | 511                              | 42         | 431   | 618         | 147                                 | 3          | 142   | 153         |
| phcn12                                                    | 510                              | 42         | 408   | 632         | 146                                 | 4          | 139   | 158         |
| phcn14                                                    | 507                              | 41         | 421   | 649         | 146                                 | 3          | 141   | 154         |
| phcn17                                                    | 511                              | 42         | 430   | 594         | 145                                 | 3          | 139   | 152         |
| phcn18                                                    | 500                              | 51         | 396   | 629         | 148                                 | 3          | 140   | 154         |
| phcn21                                                    | 499                              | 45         | 393   | 638         | 145                                 | 3          | 138   | 152         |
| phcn22                                                    | 495                              | 42         | 412   | 615         | 143                                 | 3          | 137   | 148         |
| phcn23                                                    | 498                              | 45         | 391   | 635         | 144                                 | 4          | 139   | 155         |
| phcn24                                                    | 493                              | 45         | 382   | 620         | 141                                 | 2          | 137   | 146         |
| phcn26                                                    | 499                              | 45         | 387   | 637         | 144                                 | 2          | 140   | 149         |
| phcn29                                                    | 501                              | 47         | 378   | 640         | 144                                 | 3          | 138   | 150         |
| phcn39                                                    | 494                              | 44         | 400   | 640         | 144                                 | 3          | 137   | 150         |
| phcn43                                                    | 490                              | 37         | 423   | 625         | 141                                 | 3          | 135   | 149         |
| phcn46                                                    | 502                              | 41         | 414   | 618         | 146                                 | 4          | 136   | 154         |
| phcn47                                                    | 506                              | 41         | 409   | 619         | 145                                 | 3          | 137   | 152         |
| phcn50                                                    | 494                              | 40         | 406   | 607         | 142                                 | 2          | 138   | 147         |
| phwn12                                                    | 501                              | 41         | 408   | 592         | 146                                 | 2          | 143   | 152         |
| <i>A-tracts 2</i>                                         |                                  |            |       |             |                                     |            |       |             |
| phcn2                                                     | 503                              | 44         | 408   | 598         | 144                                 | 2          | 137   | 148         |
| phcn10                                                    | 499                              | 41         | 401   | 604         | 143                                 | 3          | 136   | 148         |
| phcn13                                                    | 491                              | 45         | 382   | 635         | 145                                 | 3          | 139   | 151         |
| phcn20                                                    | 506                              | 43         | 410   | 593         | 146                                 | 3          | 139   | 151         |
| phcn30                                                    | 494                              | 40         | 397   | 597         | 144                                 | 5          | 133   | 153         |
| phcn42                                                    | 509                              | 43         | 416   | 601         | 146                                 | 3          | 141   | 153         |
| phwn8                                                     | 517                              | 45         | 418   | 606         | 145                                 | 3          | 140   | 150         |
| phwn26                                                    | 500                              | 45         | 410   | 607         | 145                                 | 3          | 140   | 152         |

| Sequence_ID        | <i>Crystallographic template</i> |            |       |             | <i>Smooth superhelical template</i> |            |       |             |
|--------------------|----------------------------------|------------|-------|-------------|-------------------------------------|------------|-------|-------------|
|                    | $\langle U \rangle$              | $\sigma_U$ | $U_0$ | $U^\dagger$ | $\langle U \rangle$                 | $\sigma_U$ | $U_0$ | $U^\dagger$ |
| phwn27             | 511                              | 44         | 410   | 595         | 145                                 | 3          | 138   | 152         |
| <i>A-tracts 3</i>  |                                  |            |       |             |                                     |            |       |             |
| phcn3              | 501                              | 39         | 393   | 607         | 144                                 | 3          | 136   | 150         |
| phcn7              | 493                              | 47         | 381   | 614         | 143                                 | 2          | 139   | 148         |
| phcn9              | 510                              | 43         | 403   | 597         | 146                                 | 5          | 135   | 154         |
| phcn11             | 510                              | 49         | 414   | 616         | 144                                 | 4          | 137   | 151         |
| phcn19             | 494                              | 43         | 399   | 587         | 143                                 | 3          | 136   | 149         |
| phcn28             | 500                              | 39         | 393   | 600         | 144                                 | 2          | 141   | 149         |
| phcn37             | 497                              | 46         | 389   | 638         | 144                                 | 2          | 139   | 150         |
| phcn44             | 500                              | 46         | 387   | 636         | 143                                 | 2          | 139   | 149         |
| phwn11             | 496                              | 42         | 386   | 615         | 143                                 | 3          | 137   | 148         |
| phwn29             | 509                              | 44         | 401   | 597         | 146                                 | 5          | 135   | 153         |
| phwn36             | 513                              | 41         | 419   | 596         | 146                                 | 4          | 137   | 153         |
| <i>TG/CTG runs</i> |                                  |            |       |             |                                     |            |       |             |
| phcn31             | 531                              | 40         | 446   | 619         | 161                                 | 5          | 150   | 170         |
| phcn32             | 535                              | 58         | 417   | 623         | 163                                 | 4          | 151   | 171         |
| phcn33             | 550                              | 47         | 452   | 621         | 168                                 | 4          | 161   | 176         |
| phcn40             | 527                              | 32         | 458   | 642         | 155                                 | 6          | 144   | 168         |
| phwn2              | 496                              | 42         | 416   | 589         | 148                                 | 4          | 140   | 158         |
| phwn3              | 518                              | 36         | 449   | 622         | 151                                 | 5          | 140   | 162         |
| phwn4              | 498                              | 42         | 421   | 590         | 149                                 | 3          | 141   | 157         |
| phwn7              | 461                              | 33         | 380   | 555         | 137                                 | 5          | 128   | 148         |
| phwn10             | 525                              | 50         | 427   | 609         | 154                                 | 3          | 147   | 162         |
| phwn13             | 536                              | 58         | 414   | 644         | 161                                 | 3          | 156   | 167         |
| phwn14             | 527                              | 51         | 381   | 611         | 156                                 | 7          | 136   | 166         |
| phwn15             | 560                              | 50         | 457   | 656         | 169                                 | 2          | 163   | 176         |
| phwn16             | 499                              | 43         | 422   | 614         | 145                                 | 5          | 134   | 155         |
| phwn17             | 502                              | 39         | 396   | 584         | 150                                 | 6          | 136   | 163         |
| phwn18             | 495                              | 50         | 401   | 602         | 144                                 | 4          | 134   | 152         |
| phwn20             | 495                              | 41         | 409   | 589         | 143                                 | 3          | 135   | 151         |
| phwn22             | 508                              | 33         | 430   | 595         | 151                                 | 5          | 141   | 162         |
| phwn23             | 528                              | 43         | 427   | 650         | 159                                 | 4          | 152   | 169         |
| phwn24             | 507                              | 37         | 432   | 615         | 147                                 | 6          | 136   | 162         |



| Sequence_ID         | <i>Crystallographic template</i> |            |       |             | <i>Smooth superhelical template</i> |            |       |             |
|---------------------|----------------------------------|------------|-------|-------------|-------------------------------------|------------|-------|-------------|
|                     | $\langle U \rangle$              | $\sigma_U$ | $U_0$ | $U^\dagger$ | $\langle U \rangle$                 | $\sigma_U$ | $U_0$ | $U^\dagger$ |
| phwn25              | 492                              | 44         | 385   | 581         | 145                                 | 6          | 132   | 157         |
| phwn28              | 506                              | 36         | 433   | 621         | 146                                 | 6          | 136   | 158         |
| phwn30              | 495                              | 36         | 409   | 597         | 147                                 | 4          | 138   | 157         |
| phwn32              | 479                              | 38         | 407   | 561         | 146                                 | 7          | 132   | 156         |
| <i>Phased TATA</i>  |                                  |            |       |             |                                     |            |       |             |
| phcn5               | 502                              | 38         | 436   | 589         | 146                                 | 13         | 127   | 173         |
| phcn25              | 513                              | 36         | 431   | 582         | 147                                 | 11         | 131   | 170         |
| phcn41              | 509                              | 38         | 415   | 583         | 149                                 | 12         | 131   | 171         |
| phcn49              | 520                              | 41         | 430   | 610         | 152                                 | 12         | 133   | 174         |
| <i>Phased TG/CA</i> |                                  |            |       |             |                                     |            |       |             |
| phcn6               | 528                              | 43         | 434   | 636         | 156                                 | 3          | 147   | 163         |
| phcn16              | 523                              | 47         | 405   | 622         | 155                                 | 3          | 147   | 159         |
| phcn27              | 530                              | 46         | 417   | 628         | 156                                 | 2          | 150   | 160         |
| phcn48              | 529                              | 47         | 447   | 642         | 154                                 | 2          | 148   | 158         |
| <i>No sequence</i>  |                                  |            |       |             |                                     |            |       |             |
| phcn1               | 483                              | 33         | 407   | 567         | 141                                 | 4          | 132   | 149         |
| phcn15              | 492                              | 39         | 420   | 574         | 142                                 | 5          | 129   | 152         |
| phcn34              | 511                              | 39         | 436   | 598         | 147                                 | 5          | 137   | 157         |
| phcn35              | 467                              | 35         | 371   | 581         | 133                                 | 5          | 123   | 146         |
| phcn36              | 493                              | 41         | 385   | 597         | 144                                 | 7          | 123   | 155         |
| phcn38              | 467                              | 35         | 371   | 581         | 133                                 | 5          | 123   | 146         |
| phcn45              | 470                              | 38         | 382   | 593         | 134                                 | 7          | 121   | 148         |
| phwn1               | 467                              | 32         | 383   | 535         | 136                                 | 6          | 123   | 149         |
| phwn5               | 491                              | 43         | 410   | 582         | 141                                 | 5          | 132   | 151         |
| phwn6               | 465                              | 34         | 387   | 540         | 135                                 | 7          | 119   | 155         |
| phwn9               | 473                              | 40         | 397   | 566         | 136                                 | 4          | 127   | 146         |
| phwn19              | 498                              | 38         | 420   | 603         | 144                                 | 4          | 137   | 152         |
| phwn21              | 477                              | 39         | 379   | 562         | 134                                 | 5          | 120   | 145         |
| phwn31              | 494                              | 46         | 386   | 597         | 142                                 | 5          | 132   | 152         |
| phwn33              | 471                              | 38         | 394   | 584         | 141                                 | 8          | 126   | 158         |
| phwn34              | 503                              | 39         | 385   | 595         | 143                                 | 5          | 134   | 153         |
| phwn35              | 467                              | 36         | 386   | 560         | 131                                 | 8          | 116   | 147         |
| phwn37              | 450                              | 27         | 393   | 528         | 133                                 | 5          | 121   | 143         |

| Sequence_ID                                           | <i>Crystallographic template</i> |            |       |             | <i>Smooth superhelical template</i> |            |       |             |
|-------------------------------------------------------|----------------------------------|------------|-------|-------------|-------------------------------------|------------|-------|-------------|
|                                                       | $\langle U \rangle$              | $\sigma_U$ | $U_0$ | $U^\dagger$ | $\langle U \rangle$                 | $\sigma_U$ | $U_0$ | $U^\dagger$ |
| <b>Anti-selection sequences from the mouse genome</b> |                                  |            |       |             |                                     |            |       |             |
| <i>TGGA fragments</i>                                 |                                  |            |       |             |                                     |            |       |             |
| 35                                                    | 500                              | 25         | 442   | 541         | 154                                 | 3          | 148   | 158         |
| 19                                                    | 492                              | 35         | 431   | 576         | 153                                 | 2          | 148   | 156         |
| 29                                                    | 480                              | 39         | 397   | 566         | 149                                 | 3          | 143   | 156         |
| 75                                                    | 495                              | 50         | 410   | 600         | 152                                 | 2          | 149   | 158         |
| 44                                                    | 486                              | 34         | 413   | 567         | 146                                 | 3          | 140   | 154         |
| 81                                                    | 482                              | 35         | 416   | 569         | 149                                 | 3          | 143   | 154         |
| 49                                                    | 474                              | 31         | 426   | 528         | 147                                 | 3          | 143   | 152         |
| 62                                                    | 474                              | 44         | 374   | 566         | 148                                 | 2          | 144   | 152         |
| 57                                                    | 472                              | 32         | 408   | 548         | 147                                 | 2          | 143   | 152         |
| 47                                                    | 480                              | 41         | 369   | 571         | 146                                 | 2          | 140   | 150         |
| 77                                                    | 481                              | 40         | 404   | 566         | 149                                 | 3          | 142   | 155         |
| 23                                                    | 478                              | 42         | 397   | 572         | 146                                 | 3          | 140   | 152         |
| 80                                                    | 482                              | 31         | 433   | 557         | 149                                 | 2          | 146   | 153         |
| 86                                                    | 463                              | 43         | 371   | 566         | 144                                 | 2          | 140   | 151         |
| <i>Badsecs</i>                                        |                                  |            |       |             |                                     |            |       |             |
| 24                                                    | 490                              | 31         | 424   | 562         | 144                                 | 5          | 133   | 154         |
| 26                                                    | 498                              | 33         | 446   | 569         | 142                                 | 1          | 140   | 145         |
| 28                                                    | 511                              | 51         | 418   | 653         | 148                                 | 3          | 143   | 152         |
| 48                                                    | 502                              | 36         | 420   | 582         | 145                                 | 6          | 134   | 160         |
| 51                                                    | 500                              | 33         | 418   | 564         | 140                                 | 4          | 133   | 148         |
| 78                                                    | 503                              | 34         | 397   | 556         | 146                                 | 6          | 134   | 157         |
| 31                                                    | 508                              | 41         | 432   | 571         | 147                                 | 3          | 140   | 152         |
| 32                                                    | 516                              | 49         | 427   | 627         | 149                                 | 3          | 140   | 154         |
| 33                                                    | 518                              | 38         | 424   | 597         | 149                                 | 8          | 129   | 163         |
| 52                                                    | 494                              | 30         | 428   | 551         | 143                                 | 6          | 133   | 153         |
| 63                                                    | 526                              | 36         | 433   | 595         | 147                                 | 7          | 138   | 161         |
| 69                                                    | 508                              | 37         | 454   | 615         | 146                                 | 4          | 131   | 153         |
| 73                                                    | 506                              | 35         | 428   | 589         | 146                                 | 4          | 139   | 156         |
| 76                                                    | 493                              | 34         | 430   | 593         | 144                                 | 4          | 135   | 152         |
| 84                                                    | 486                              | 27         | 433   | 544         | 144                                 | 6          | 134   | 157         |
| 85                                                    | 503                              | 34         | 418   | 594         | 149                                 | 4          | 141   | 157         |

| Sequence_ID                      | <i>Crystallographic template</i> |            |       |             | <i>Smooth superhelical template</i> |            |       |             |
|----------------------------------|----------------------------------|------------|-------|-------------|-------------------------------------|------------|-------|-------------|
|                                  | $\langle U \rangle$              | $\sigma_U$ | $U_0$ | $U^\dagger$ | $\langle U \rangle$                 | $\sigma_U$ | $U_0$ | $U^\dagger$ |
| 27                               | 452                              | 38         | 386   | 532         | 128                                 | 4          | 119   | 138         |
| 30                               | 490                              | 38         | 395   | 559         | 142                                 | 4          | 134   | 148         |
| 43                               | 484                              | 35         | 389   | 579         | 136                                 | 4          | 130   | 142         |
| 53                               | 488                              | 30         | 437   | 549         | 140                                 | 4          | 132   | 147         |
| 55                               | 489                              | 36         | 422   | 556         | 142                                 | 3          | 135   | 146         |
| 56                               | 493                              | 28         | 450   | 538         | 142                                 | 6          | 133   | 149         |
| 59                               | 485                              | 49         | 397   | 593         | 142                                 | 4          | 134   | 151         |
| 66                               | 515                              | 42         | 397   | 616         | 147                                 | 5          | 138   | 156         |
| 67                               | 521                              | 48         | 444   | 602         | 152                                 | 4          | 141   | 158         |
| 74                               | 512                              | 40         | 432   | 602         | 143                                 | 4          | 137   | 151         |
| <b>Synthetic SELEX sequences</b> |                                  |            |       |             |                                     |            |       |             |
| 10nvp                            | 477                              | 32         | 407   | 561         | 136                                 | 5          | 121   | 150         |
| 11nvp                            | 483                              | 41         | 390   | 579         | 137                                 | 5          | 126   | 149         |
| 13nvp                            | 467                              | 36         | 368   | 615         | 132                                 | 7          | 114   | 146         |
| 16nvp                            | 488                              | 36         | 371   | 595         | 139                                 | 6          | 124   | 151         |
| 18nvp                            | 479                              | 40         | 362   | 611         | 138                                 | 5          | 127   | 149         |
| 22nvp                            | 480                              | 38         | 376   | 577         | 138                                 | 6          | 124   | 153         |
| 24nvp                            | 481                              | 34         | 364   | 575         | 139                                 | 5          | 122   | 148         |
| 25nvp                            | 479                              | 41         | 368   | 629         | 139                                 | 5          | 128   | 152         |
| 26nvp                            | 493                              | 38         | 397   | 589         | 141                                 | 7          | 124   | 155         |
| 28nvp                            | 485                              | 40         | 368   | 597         | 140                                 | 7          | 124   | 155         |
| 29nvp                            | 484                              | 42         | 390   | 609         | 140                                 | 6          | 124   | 150         |
| 2nvp                             | 490                              | 38         | 400   | 630         | 140                                 | 4          | 130   | 147         |
| 30nvp                            | 481                              | 31         | 416   | 572         | 138                                 | 5          | 126   | 154         |
| 34nvp                            | 483                              | 41         | 345   | 584         | 138                                 | 4          | 128   | 148         |
| 37nvp                            | 471                              | 38         | 359   | 586         | 138                                 | 5          | 126   | 149         |
| 38nvp                            | 471                              | 42         | 382   | 605         | 136                                 | 5          | 122   | 148         |
| 40nvp                            | 469                              | 41         | 345   | 601         | 134                                 | 6          | 122   | 152         |
| 41nvp                            | 477                              | 37         | 399   | 562         | 136                                 | 4          | 125   | 150         |
| 52nvp                            | 481                              | 38         | 378   | 589         | 137                                 | 5          | 123   | 146         |
| 54nvp                            | 484                              | 41         | 393   | 643         | 138                                 | 7          | 123   | 155         |
| 5nvp                             | 483                              | 38         | 394   | 599         | 140                                 | 4          | 128   | 151         |
| 602nvp_rev_rev                   | 477                              | 37         | 382   | 573         | 136                                 | 7          | 124   | 154         |

| Sequence_ID    | <i>Crystallographic template</i> |            |       |             | <i>Smooth superhelical template</i> |            |       |             |
|----------------|----------------------------------|------------|-------|-------------|-------------------------------------|------------|-------|-------------|
|                | $\langle U \rangle$              | $\sigma_U$ | $U_0$ | $U^\dagger$ | $\langle U \rangle$                 | $\sigma_U$ | $U_0$ | $U^\dagger$ |
| 603nvp         | 487                              | 44         | 358   | 618         | 138                                 | 5          | 124   | 150         |
| 604rnvp        | 496                              | 37         | 415   | 594         | 141                                 | 5          | 129   | 154         |
| 605nvp         | 489                              | 39         | 371   | 575         | 139                                 | 5          | 126   | 153         |
| 607nvp_rev_rev | 476                              | 39         | 347   | 571         | 135                                 | 4          | 123   | 146         |
| 609nvp         | 475                              | 41         | 381   | 587         | 136                                 | 7          | 118   | 152         |
| 611nvp         | 466                              | 37         | 361   | 585         | 132                                 | 5          | 121   | 143         |
| 613nvp         | 476                              | 41         | 372   | 583         | 138                                 | 5          | 126   | 149         |
| 615fnvp        | 475                              | 39         | 342   | 590         | 134                                 | 6          | 123   | 152         |
| 618nvp_rev_rev | 479                              | 37         | 390   | 587         | 137                                 | 4          | 128   | 146         |
| 620nvp_rev_rev | 470                              | 40         | 366   | 577         | 133                                 | 5          | 121   | 146         |
| 621rnvp        | 480                              | 36         | 390   | 565         | 137                                 | 5          | 125   | 152         |
| 624bnvp        | 481                              | 36         | 389   | 570         | 137                                 | 4          | 129   | 145         |
| 626nvp         | 488                              | 34         | 399   | 579         | 139                                 | 5          | 126   | 150         |
| 628nvp_rev_rev | 477                              | 43         | 374   | 586         | 136                                 | 8          | 117   | 157         |
| 69nvp          | 475                              | 44         | 373   | 610         | 135                                 | 7          | 119   | 149         |
| 6nvp           | 474                              | 39         | 386   | 576         | 134                                 | 5          | 122   | 149         |
| 73nvp          | 485                              | 44         | 358   | 628         | 139                                 | 5          | 123   | 148         |
| 7nvp           | 485                              | 35         | 408   | 593         | 137                                 | 5          | 128   | 149         |
| 83nvp          | 472                              | 42         | 340   | 630         | 137                                 | 6          | 123   | 152         |

<sup>§</sup> Threading scores reported for individual sequences are the total dimeric scores computed with Eqn. (1) using all six step parameters and elastic constants and rest states based on the dimer steps from all conformational categories, *i.e.*, the A+B+AB dataset in Table 1. Values include the mean score  $\langle U \rangle$  and the standard deviation  $\sigma_U$  for all possible settings of each sequence on the designated templates as well as the lowest and highest scores  $U_0$  and  $U^\dagger$  associated with the best and worst settings of each sequence on the template.

### Legends to Supplementary Figures

**Figure S1.** Collective scatter plots of the rigid-body (step) parameters found for the ten unique DNA base-pair steps in the high-resolution protein-DNA crystal complexes that make up the reference database, the sequence-dependent potentials derived from these data, and the step-parameter values found in nucleosomal DNA. Small black dots correspond to the points used to derive the potentials (solid contours) and large red dots to the states that the given dimers adopt in the currently best-resolved nucleosome core particle structure (NDB\_ID pd0287, Davey *et al.* 2002. *J. Mol. Biol.* **319**, 1097-1113). Ellipses are projections of the multi-dimensional potentials on the specified conformational planes obtained from the  $2 \times 2$  covariance matrices of observed values: (a) Roll-Twist; (b) Roll-Slide; (c) Twist-Slide. Contours correspond to deviations of parameters equal to two times the combined root-mean-square deviations from the intrinsic (mean) values. Average values of step parameters are highlighted by thin (dashed) lines. The three columns show the respective deformational patterns of individual purine-purine (RR), purine-pyrimidine (RY), and pyrimidine-purine (YR) steps. Note the absence of CG steps in the nucleosomal DNA. Images kindly provided by Guohui Zheng.

**Figure S2.** Comparative variation of Twist, expressed the number of base pairs that would form a complete turn of an ideal, naturally straight helix, as a function of DNA superhelical position in two 147-bp nucleosome core-particle structures: (top) the DNA pathway in the currently best-resolved nucleosome core particle structure (NDB\_ID pd0287/PDB\_ID 1kx5, Davey *et al.* 2002. *J. Mol. Biol.* **319**, 1097-1113); (bottom) the pathway adopted by the same sequence in the presence of cisplatin (NDB\_ID pd1046/PDB\_ID 3b6f, Wu & Davey. 2008. *Nature Chem. Biol.* **4**, 110-112). Superhelical positions correspond to the number of double-helical turns a dimeric step is displaced from the structural dyad on the central base pair (here denoted by 0). Color-coded lines denote the helical repeat in the canonical A-DNA (Franklin & Gosling. 1953. *Nature* **171**, 740-741) and C-DNA (Marvin *et al.* 1958. *Nature* **182**, 387-388) double helices.

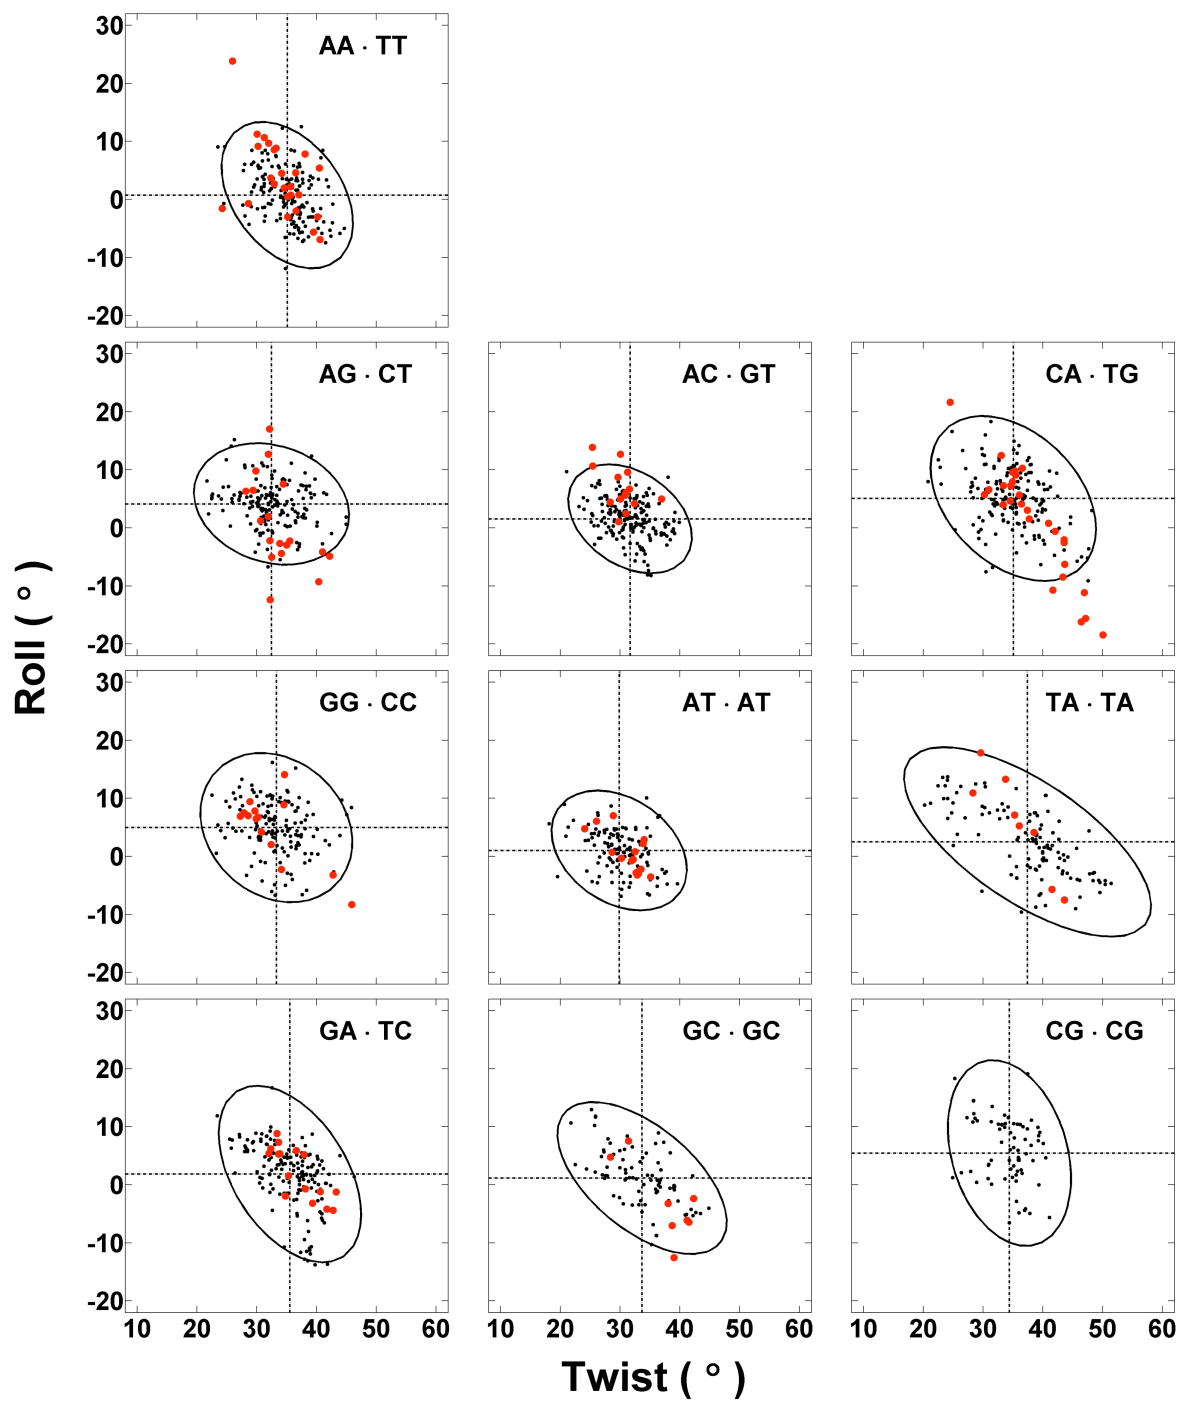Balasubramanian *et al.*, Figure S1a

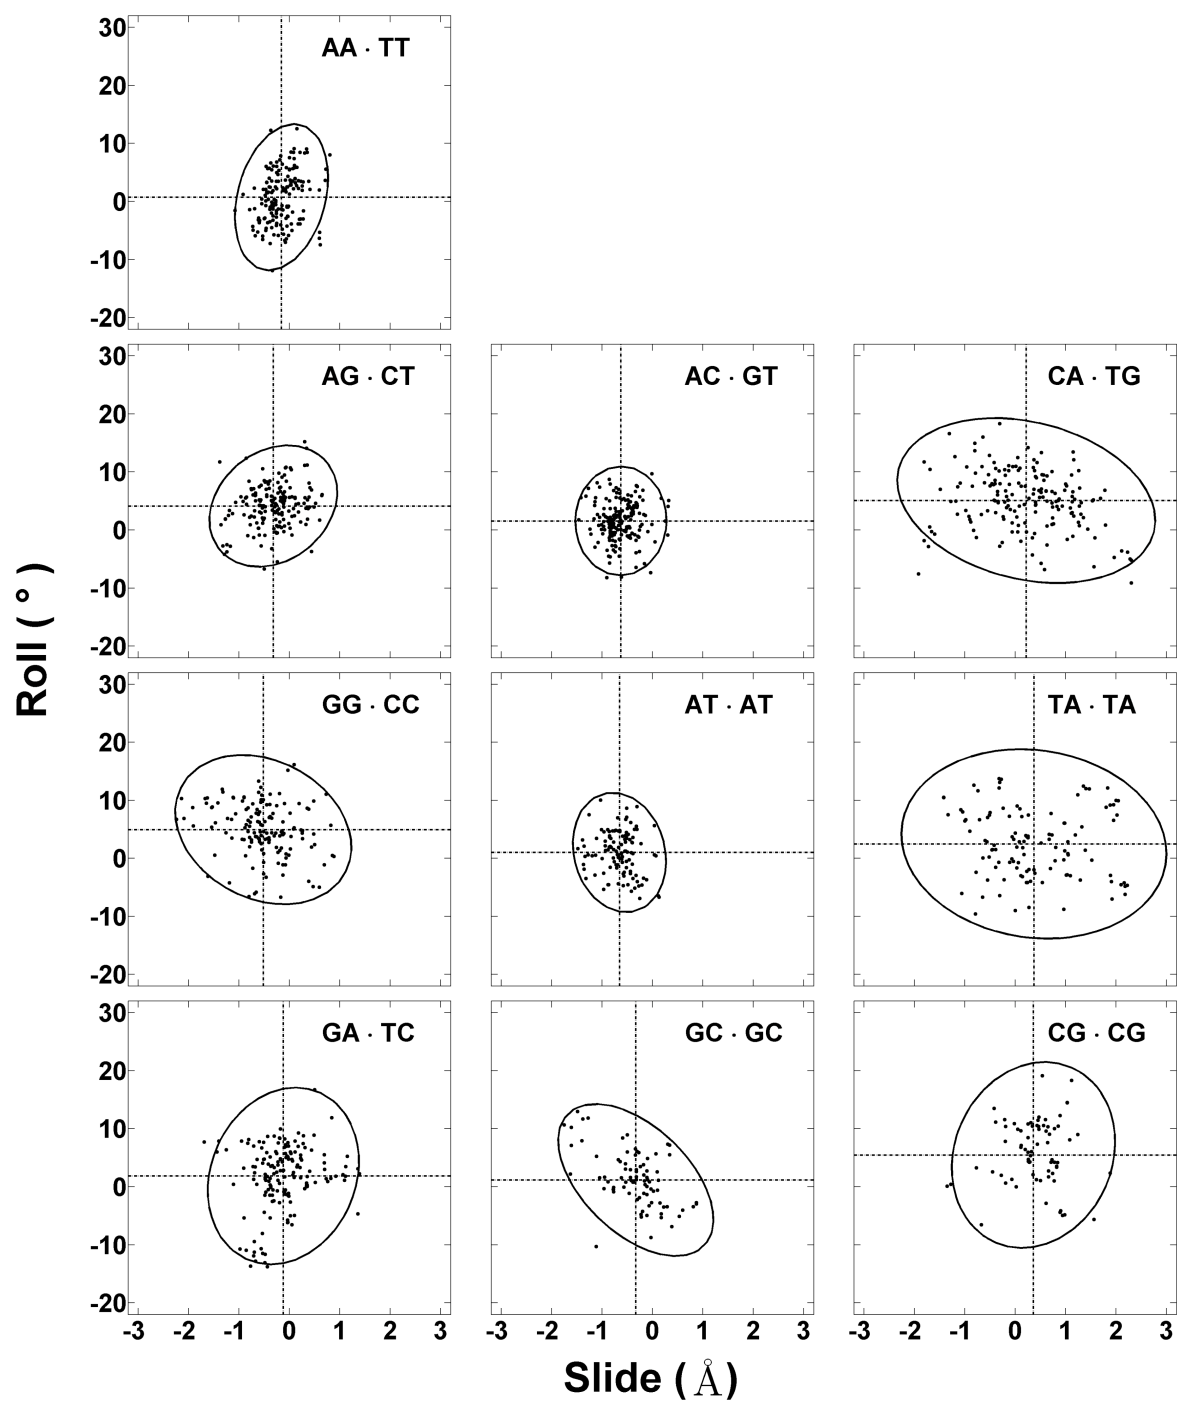Balasubramanian *et al.*, Figure S1b

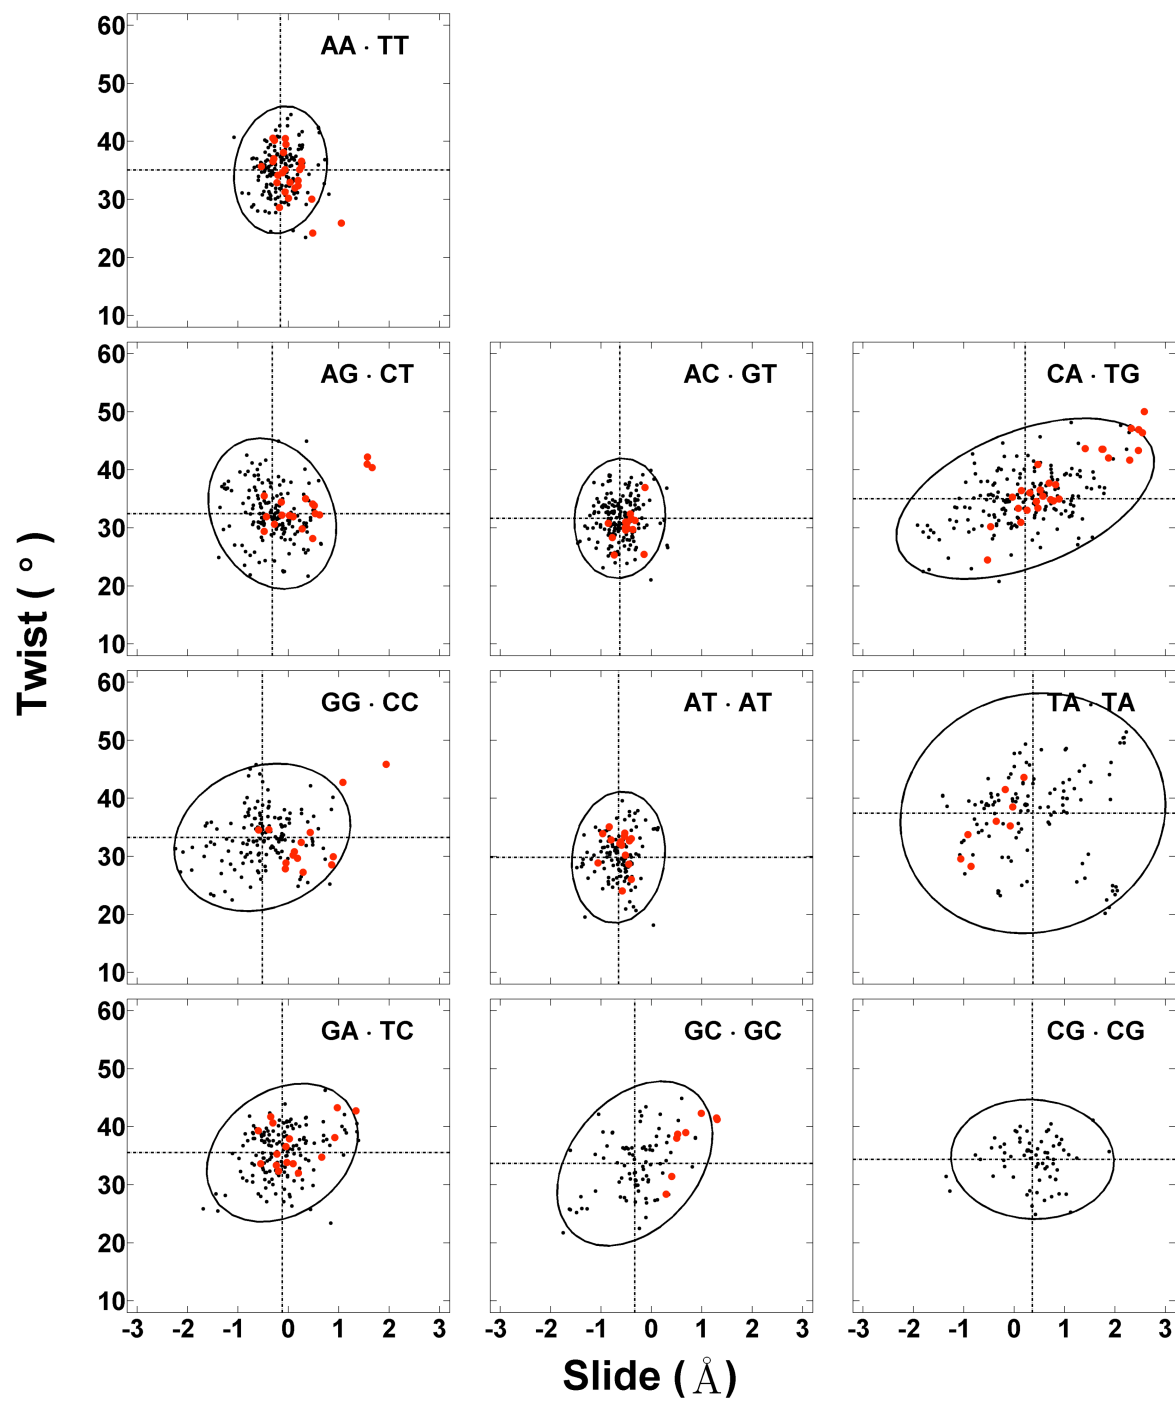Balasubramanian *et al.*, Figure S1c



The presence of cisplatin appears to unwind nucleosomal DNA to more A-like states.

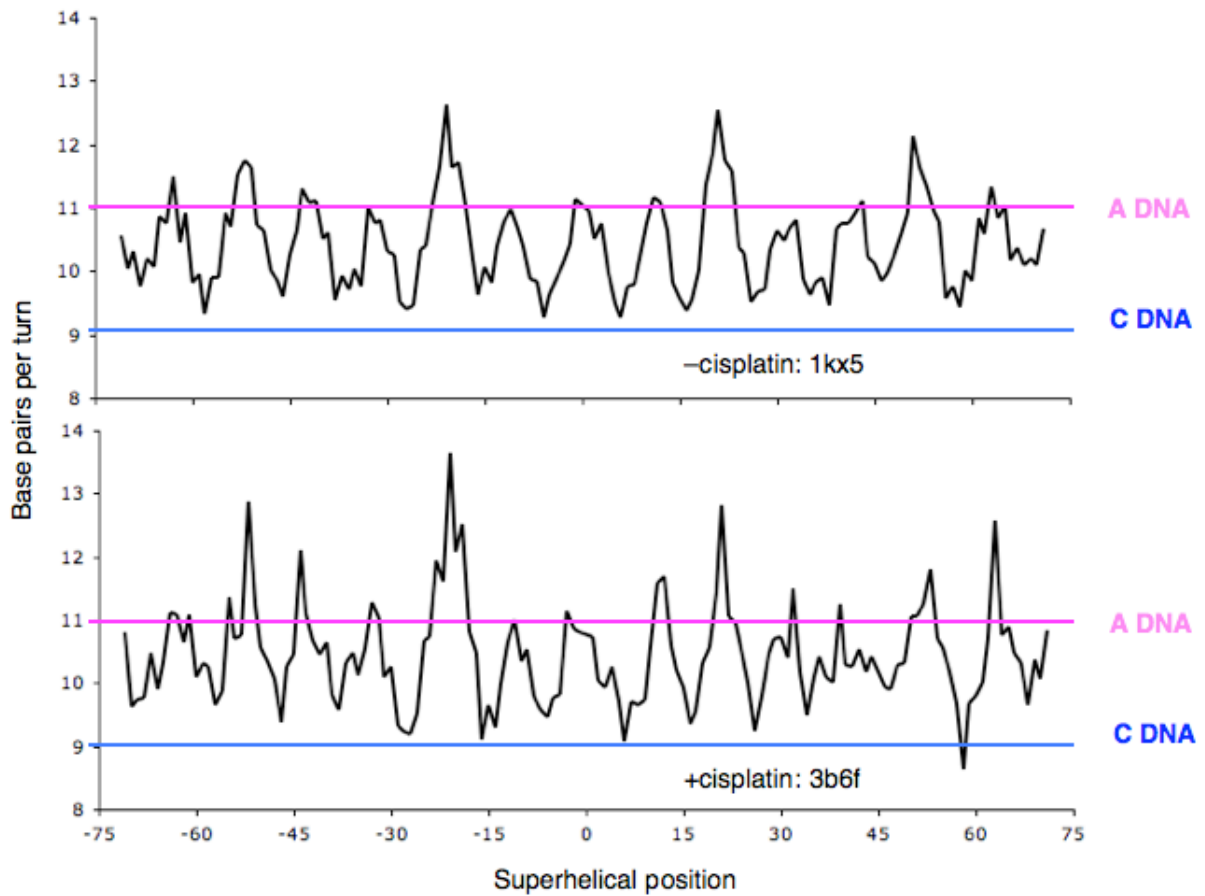

Balasubramanian *et al.*, Figure S2
